# Supplementary material for: Recovery from recurrent depression with mindfulness-based cognitive therapy and antidepressants: a qualitative study with illustrative case studies
Source: PubMed Central journal article supplement (PMC7044862; doi:10.1136/bmjopen-2019-033892), 2020-02-18
Supplement: bmjopen-2019-033892.draft_revisions.pdf [file bmjopen-2019-033892.draft_revisions.pdf]

# BMJ Open

BMJ Open is committed to open peer review. As part of this commitment we make the peer review history of every article we publish publicly available.

When an article is published we post the peer reviewers' comments and the authors' responses online. We also post the versions of the paper that were used during peer review. These are the versions that the peer review comments apply to.

The versions of the paper that follow are the versions that were submitted during the peer review process. They are not the versions of record or the final published versions. They should not be cited or distributed as the published version of this manuscript.

BMJ Open is an open access journal and the full, final, typeset and author-corrected version of record of the manuscript is available on our site with no access controls, subscription charges or pay-per-view fees (<http://bmjopen.bmj.com>).

If you have any questions on BMJ Open's open peer review process please email [info.bmjopen@bmj.com](mailto:info.bmjopen@bmj.com)

# BMJ Open

## Discontinuing antidepressants with the support of psychological therapy: a qualitative study in the UK.

|                               |                                                                                                                                                                                                                                                                                                                                                                                                                                                                                                                                                                                                                                                                                                                                                            |
|-------------------------------|------------------------------------------------------------------------------------------------------------------------------------------------------------------------------------------------------------------------------------------------------------------------------------------------------------------------------------------------------------------------------------------------------------------------------------------------------------------------------------------------------------------------------------------------------------------------------------------------------------------------------------------------------------------------------------------------------------------------------------------------------------|
| Journal:                      | <i>BMJ Open</i>                                                                                                                                                                                                                                                                                                                                                                                                                                                                                                                                                                                                                                                                                                                                            |
| Manuscript ID                 | bmjopen-2019-033892                                                                                                                                                                                                                                                                                                                                                                                                                                                                                                                                                                                                                                                                                                                                        |
| Article Type:                 | Research                                                                                                                                                                                                                                                                                                                                                                                                                                                                                                                                                                                                                                                                                                                                                   |
| Date Submitted by the Author: | 27-Aug-2019                                                                                                                                                                                                                                                                                                                                                                                                                                                                                                                                                                                                                                                                                                                                                |
| Complete List of Authors:     | <p>Tickell, Alice; University of Oxford, Psychiatry<br/>         Byng, Richard; University of Plymouth, Community and Primary Care Research Group<br/>         Crane, Catherine; University of Oxford, Psychiatry<br/>         Gradinger, Felix; Plymouth University, Community and Primary Care Research Group<br/>         Hayes, Rachel; University of Exeter, College of Medicine and Health<br/>         Robson, James; University of Oxford, Education<br/>         Cardy, Jessica; Oxford University, Oxford Institute of Clinical Psychology Training<br/>         Weaver, Alice; Devon Partnership NHS Trust<br/>         Morant, Nicola; University College London, Psychiatry<br/>         Kuyken, Willem; University of Oxford, Psychiatry</p> |
| Keywords:                     | Depression & mood disorders < PSYCHIATRY, psychological therapy, antidepressants                                                                                                                                                                                                                                                                                                                                                                                                                                                                                                                                                                                                                                                                           |
|                               |                                                                                                                                                                                                                                                                                                                                                                                                                                                                                                                                                                                                                                                                                                                                                            |

SCHOLARONE™  
Manuscripts

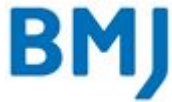

I, the Submitting Author has the right to grant and does grant on behalf of all authors of the Work (as defined in the below author licence), an exclusive licence and/or a non-exclusive licence for contributions from authors who are: i) UK Crown employees; ii) where BMJ has agreed a CC-BY licence shall apply, and/or iii) in accordance with the terms applicable for US Federal Government officers or employees acting as part of their official duties; on a worldwide, perpetual, irrevocable, royalty-free basis to BMJ Publishing Group Ltd ("BMJ") its licensees and where the relevant Journal is co-owned by BMJ to the co-owners of the Journal, to publish the Work in this journal and any other BMJ products and to exploit all rights, as set out in our [licence](#).

The Submitting Author accepts and understands that any supply made under these terms is made by BMJ to the Submitting Author unless you are acting as an employee on behalf of your employer or a postgraduate student of an affiliated institution which is paying any applicable article publishing charge ("APC") for Open Access articles. Where the Submitting Author wishes to make the Work available on an Open Access basis (and intends to pay the relevant APC), the terms of reuse of such Open Access shall be governed by a Creative Commons licence – details of these licences and which [Creative Commons](#) licence will apply to this Work are set out in our licence referred to above.

Other than as permitted in any relevant BMJ Author's Self Archiving Policies, I confirm this Work has not been accepted for publication elsewhere, is not being considered for publication elsewhere and does not duplicate material already published. I confirm all authors consent to publication of this Work and authorise the granting of this licence.

1  
2  
3 **DISCONTINUING ANTIDEPRESSANTS WITH THE SUPPORT OF PSYCHOLOGICAL**  
4  
5 **THERAPY: A QUALITATIVE STUDY IN THE UK**  
6  
7  
8  
9

10  
11 Alice Tickell, Department of Psychiatry, University of Oxford, [alice.tickell@psych.ox.ac.uk](mailto:alice.tickell@psych.ox.ac.uk)  
12

13  
14 Richard Byng, Community and Primary Care Research Group, University of Plymouth,  
15  
16 [richard.byng@plymouth.ac.uk](mailto:richard.byng@plymouth.ac.uk)  
17

18  
19 Catherine Crane, Department of Psychiatry, University of Oxford, [catherine.crane@psych.ox.ac.uk](mailto:catherine.crane@psych.ox.ac.uk)  
20

21  
22 Felix Gradinger, Community and Primary Care Research Group, University of Plymouth,  
23  
24 [felix.gradinger@plymouth.ac.uk](mailto:felix.gradinger@plymouth.ac.uk)  
25

26  
27 Rachel Hayes, College of Medicine and Health, University of Exeter, [r.a.hayes@exeter.ac.uk](mailto:r.a.hayes@exeter.ac.uk)  
28

29  
30 James Robson, Department of Education, University of Oxford, [james.robson@education.ox.ac.uk](mailto:james.robson@education.ox.ac.uk)  
31

32  
33 Jessica Cardy, Oxford Institute of Clinical Psychology Training, University of Oxford,  
34  
35 [jessica.cardy@hmc.ox.ac.uk](mailto:jessica.cardy@hmc.ox.ac.uk)  
36

37  
38 Alice Weaver, Devon Partnership NHS Trust, [a.weaver@exeter.ac.uk](mailto:a.weaver@exeter.ac.uk)  
39

40  
41 Nicola Morant, Division of Psychiatry, University College London, [n.morant@ucl.ac.uk](mailto:n.morant@ucl.ac.uk)  
42

43  
44 Willem Kuyken, Department of Psychiatry, University of Oxford, [willem.kuyken@psych.ox.ac.uk](mailto:willem.kuyken@psych.ox.ac.uk)  
45

46  
47 Correspondence concerning the article should be addressed to Professor Willem Kuyken, Department  
48  
49 of Psychiatry, Warneford Hospital, Oxford, OX3 7JX.  
50

51  
52 Email: [willem.kuyken@psych.ox.ac.uk](mailto:willem.kuyken@psych.ox.ac.uk)  
53

54  
55  
56 **Word Count**  
57

58  
59 9881 (excluding title page, abstract, references, figures, and tables)  
60

## DISCONTINUING ANTIDEPRESSANT MEDICATION

**Contributor Statement**

1  
2  
3  
4  
5  
6 WK, RB & NM were responsible for the PREVENT trial protocol and secured the study funding. NM  
7  
8 designed the over-arching qualitative process study to elicit service users' experiences of treatment,  
9  
10 with input from RB, FG, RH, JC, and WK. Interviews were conducted by FG and AW, supervised by  
11  
12 NM. CC, WK, JR, and AT developed the analytical strategy and protocol for the study reported here,  
13  
14 and AT conducted the bulk of the analysis, with input from other members of the analytical team. AT  
15  
16 drafted the manuscript with input from CC. All other authors read the manuscript, revised it for  
17  
18 significant intellectual content, and approved the final manuscript. As Chief Investigator, WK had  
19  
20 overall responsibility for the parent trial within which this study was embedded. The University of  
21  
22 Exeter held responsibility for the parent trial and this work. WK is guarantor and corresponding  
23  
24 author for the study.  
25  
26

**Competing Interest Statement**

27  
28  
29  
30 All authors have completed the ICMJE uniform disclosure form at [www.icmje.org/coi\\_disclosure.pdf](http://www.icmje.org/coi_disclosure.pdf)  
31  
32 and declare the following: AT reports that she is employed as a researcher at the University of Oxford  
33  
34 Mindfulness Centre, conducting research on mindfulness-based interventions. However, she receives  
35  
36 no additional remuneration for teaching or publications related to mindfulness-based approaches. RB  
37  
38 has written about his concerns about the increases in prescribing of antidepressants. CC reports that  
39  
40 she is employed as a researcher at the University of Oxford Mindfulness Centre, conducting research  
41  
42 on mindfulness-based interventions. However, she receives no additional remuneration for teaching or  
43  
44 publications related to mindfulness-based approaches. WK is the Director of the Oxford Mindfulness  
45  
46 Centre. He receives no payments for training workshops and presentations related to MBCT; such  
47  
48 payments are made directly to the Oxford Mindfulness Foundation, a charitable trust that supports the  
49  
50 work of the Oxford Mindfulness Centre. He receives royalties for his book Mindfulness: Ancient  
51  
52 wisdom meets modern psychology published by Guilford Press. WK was until 2015 an unpaid  
53  
54 Director of the Mindfulness Network Community Interest Company and gave evidence to the UK  
55  
56 Mindfulness All Party Parliamentary Group. FG, RH, JR, JC, AW, and NM have nothing to disclose.  
57  
58  
59  
60

## DISCONTINUING ANTIDEPRESSANT MEDICATION

**Transparency Statement**

WK confirms that the manuscript is an honest, accurate, and transparent account of the study being reported; that no important aspects of the study have been omitted; and that any discrepancies from the study as originally planned have been explained. He attests that all listed authors meet authorship criteria and that no others meeting the criteria have been omitted.

**Funding Statement**

The PREVENT trial was funded by the National Institute for Health Research Health Technology Assessment (NIHR HTA) Programme [08/56/01] and was published in full in Health Technology Assessment. The views and opinions expressed therein are those of the authors and do not necessarily reflect those of the HTA programme, NIHR, NHS or the Department of Health and Social Care. A Trial Steering Committee (TSC), Data and Ethics Monitoring Committee (DMEC), the UK Mental Health Research Network (MHRN), the Primary Care Research Network (PCRN), and the Comprehensive Local Research Network (CLRN) all provided support to the project. WK, CC and AT are supported by the Wellcome Trust [107496/Z/15/Z]. RB received funding from NIHR Collaboration for Leadership in Applied Health Research and Care South West Peninsula.

The funders had no role in the design of the study, in the collection, analysis and interpretation of the data, in the writing of the report, or in the decision to submit the article for publication. All authors are independent of the funders, had full access to all of the data in the study, and can take responsibility for the integrity of the data and the accuracy of the data analysis.

**License**

The Corresponding Author has the right to grant on behalf of all authors and does grant on behalf of all authors, a [worldwide licence](#) to the Publishers and its licensees in perpetuity, in all forms, formats and media (whether known now or created in the future), to i) publish, reproduce, distribute, display and store the Contribution, ii) translate the Contribution into other languages, create adaptations, reprints, include within collections and create summaries, extracts and/or, abstracts of the Contribution and convert or allow conversion into any format including without limitation audio, iii)

## DISCONTINUING ANTIDEPRESSANT MEDICATION

1  
2  
3 create any other derivative work(s) based in whole or part on the on the Contribution, iv) to exploit all  
4 subsidiary rights to exploit all subsidiary rights that currently exist or as may exist in the future in the  
5 Contribution, v) the inclusion of electronic links from the Contribution to third party material where-  
6 ever it may be located; and, vi) licence any third party to do any or all of the above. All research  
7 articles will be made available on an open access basis. The terms of such open access shall be  
8 governed by a [Creative Commons](#) licence—details as to which Creative Commons licence will apply  
9 to the research article are set out in our worldwide licence referred to above.

**Acknowledgements**

10  
11  
12  
13  
14  
15  
16  
17  
18  
19  
20  
21 We would like to thank Trish Bartley for her input to MBCT therapist training and MBCT fidelity  
22 checks. We are grateful to members of our Trial Steering Committee (Chris Leach, Richard Moore  
23 and Glenys Parry) and Data Monitoring Committee (Paul Ewings, Andy Field and Joanne  
24 MacKenzie) for their valuable advice and support during the project. We acknowledge the additional  
25 support provided by the Mental Health and Primary Care Research Networks. We also acknowledge  
26 the support provided by the Department of Health and local Primary Care Trusts, in meeting the  
27 excess treatment and service support costs associated with the trial. Thanks go to the PREVENT  
28 research team, who facilitated wider qualitative work in the trial, including Aaron Causley, Anna  
29 Hunt, Pooja Shah, Holly Sugg, Harry Sutton, and Matthew Williams. Above all, we are grateful to the  
30 participants for their time in taking part in this trial.

**Data Sharing Statement**

31  
32  
33  
34  
35  
36  
37  
38  
39  
40  
41  
42  
43  
44  
45  
46 We will not be making the data publicly available due to its highly confidential and identifiable  
47 nature.

**Dissemination Declaration**

48  
49  
50  
51  
52  
53  
54  
55  
56  
57  
58  
59  
60  
The trial results were disseminated in workshops and via a flyer to all participants who requested this  
feedback. The findings of this study will be disseminated to relevant audiences through University of  
Oxford communications.

## DISCONTINUING ANTIDEPRESSANT MEDICATION

**ABSTRACT**

Objectives: The aim of this study was to describe and interpret people's experiences in the two years after taking part in a psychological programme to support discontinuation of maintenance antidepressant medication (ADM) and recovery from recurrent depression.

Design: A qualitative study embedded within a multicentre, single blind, randomised controlled trial (the PREVENT trial).

Setting: The trial recruited participants from general practices (GP) in urban and rural settings in four UK centres. Qualitative data was gathered from interviews conducted in people's homes.

Participants: 42 people who participated in the active arm of the trial and were purposively sampled to represent a range of treatment responses and ADM discontinuation profiles.

Intervention: Mindfulness-based cognitive therapy with tapering support to facilitate discontinuation of maintenance ADMs (MBCT-TS). Eight weekly group sessions, with four refresher sessions offered in the year following the end of the programme compared to continuation of maintenance ADMs.

Main outcomes: In-depth interviews and written feedback collected in the two years after MBCT-TS.

Results: Many participants reported beneficial effects of learning MBCT-TS to support relapse prevention, which facilitated tapering or full discontinuation of ADMs. There were also aspects of people's experiences that contributed to their decisions to remain on ADMs. The analysis yielded seven over-arching themes: (1) beliefs about the causes of depression; (2) control; (3) acceptance; (4) quality of life; (5) tapering process; (6) interactions with GP, and (7) timing.

Conclusions: Psychological therapy can support people with a history of recurrent depression to discontinue ADMs, by teaching skills to manage depressive symptoms and the tapering process.

However, this is an effortful process, requiring time and motivation to learn and apply psychological techniques, relatively stable life circumstances, and adequate support from medical professionals.

Nevertheless, psychological therapy may increase quality of life whether or not the person successfully discontinues their ADMs or experiences further depressive symptoms.



## DISCONTINUING ANTIDEPRESSANT MEDICATION

**STRENGTHS AND LIMITATIONS OF THE STUDY**

- This qualitative study explored experiences of participants with recurrent depression attempting to taper and discontinue maintenance antidepressant medication with the support of psychological therapy.
- Participants were followed up for two years following participation in psychological therapy, and the study represents one of the first to provide a longer-term perspective on psychological therapy-supported antidepressant discontinuation.
- The study raises questions about the contributions of both psychological therapy and antidepressant medication to recovery from recurrent major depression, and how such recovery is measured.
- Participants were drawn from a large, pragmatic, randomised controlled trial which recruited people open to trying psychological therapy as an alternative to maintenance antidepressants. Thus participants are unlikely to be fully representative of people with recurrent depression seen in primary care.
- We interviewed participants who had attended at least 50% of psychological therapy sessions offered. Thus findings do not reflect the experiences of those people who were randomised to, but did not choose to engage with psychological therapy.

## DISCONTINUING ANTIDEPRESSANT MEDICATION

1  
2  
3 Depression is a major public health problem: globally more than 300 million people suffer from  
4 depression, and lifetime prevalence rates are estimated to be between 6-20% across both high and low-  
5 middle income countries.[1,2] Furthermore, depression is a relapsing and recurring condition, and on  
6 average people have seven or eight depressive episodes over their lifetime.[3] Current guidance from  
7 the National Institute for Health and Clinical Excellence (NICE) recommends that people with recurrent  
8 depression should be prescribed maintenance antidepressants (ADMs) for at least two years after  
9 remission to manage their ongoing risk of relapse and recurrence.[4] Indeed, there has been a substantial  
10 increase in ADM prescribing observed in the UK over the past two decades, largely due to increases in  
11 the number of patients on long-term medication.[5] However, many people report difficulties when  
12 trying to taper and discontinue ADMs,[6] and healthcare professionals are not always confident in  
13 supporting their patients with the process of ADM discontinuation.[7] Research suggests that  
14 psychological therapies, such as mindfulness-based cognitive therapy (MBCT) and cognitive-  
15 behavioural therapy (CBT), may support people to discontinue ADMs without increasing risk of  
16 depressive relapse or recurrence.[8-10] Therefore, it may be useful for healthcare professionals to  
17 recommend psychological therapy to their patients wishing to taper and discontinue ADMs. However,  
18 more work is needed to understand people's experience of undertaking psychological therapy alongside  
19 ADM tapering and discontinuation. This paper explores how people with a history of recurrent  
20 depression describe and make decisions about discontinuing ADMs with the support of MBCT.  
21  
22  
23  
24  
25  
26  
27  
28  
29  
30  
31  
32  
33  
34  
35  
36  
37  
38  
39  
40  
41

42 People describe a number of reasons for wanting to discontinue ADMs, including feeling better  
43 and wanting to test whether depression has gone away, ambivalence and uncertainty about the role of  
44 ADMs in recovery, side effects outweighing benefits, lack of noticeable effects, questioning whether  
45 the self on ADMs is the 'real self', and wanting to assert control over their wellbeing.[11] However,  
46 qualitative research has identified a number of practical and psychological barriers to ADM  
47 discontinuation, including concerns about withdrawal effects, fear of relapse, perceived lack of  
48 alternative coping strategies, and inadequate information about either alternative treatment options or  
49 discontinuation.[6] Furthermore, research with healthcare professionals has identified a number of  
50 factors that hinder them from supporting patients to discontinue ADMs, including concerns about  
51  
52  
53  
54  
55  
56  
57  
58  
59  
60

## DISCONTINUING ANTIDEPRESSANT MEDICATION

1  
2  
3 destabilising a currently well patient, and lack of confidence in their professional skills and knowledge  
4 regarding discontinuation.[7] Thus, it is clear that more knowledge is needed to understand how best to  
5 support people with ADM discontinuation, without risking destabilisation and relapse/recurrence.  
6  
7 Clinical guidelines recommend psychological therapies such as CBT and MBCT to reduce ongoing risk  
8 of relapse and recurrence.[4] Moreover, several studies have suggested that the skills learned in CBT  
9 and MBCT could support ADM discontinuation without increasing the risk of depressive relapse and  
10 recurrence.[8-10] Despite this, understanding of the role of psychological therapy in supporting ADM  
11 discontinuation and depression relapse prevention is still emerging. In a recent thematic synthesis of  
12 barriers and facilitators to discontinuing ADMs,[6] only two studies discussed participants undertaking  
13 psychological therapy alongside ADM use and discontinuation,[12,13] with the latter study focusing  
14 on the role of treatment in restructuring of participants' sense of self and illness experience, rather than  
15 the question of how and why some people, and not others, successfully discontinued their ADMs.  
16  
17  
18  
19  
20  
21  
22  
23  
24  
25  
26  
27  
28

29 This study considered the experiences of people contemplating, commencing, and completing  
30 psychological therapy-supported ADM discontinuation. It was embedded within a randomised  
31 controlled trial,[14] which compared two strategies to help people with recurrent depression to stay  
32 well over two years: MBCT with tapering support to facilitate discontinuation of maintenance ADMs  
33 (hereafter MBCT-TS), and maintenance ADMs. The study examined qualitative accounts from  
34 participants who took part in MBCT-TS, whose experiences differed with respect to treatment  
35 outcomes (e.g. those who relapsed to depression and those who did not), and ADM discontinuation  
36 profiles (those who remained on ADMs and those who tapered, discontinued, or resumed). We  
37 investigated how participants described the impact of MBCT-TS on their patterns of ADM usage over  
38 a 24-month follow-up period, to try to understand why some people, but not others, discontinued  
39 ADMs with the support of psychological therapy. These findings could inform decision-making  
40 between clinicians and patients about the journey of management and recovery from recurrent  
41 depression.  
42  
43  
44  
45  
46  
47  
48  
49  
50  
51  
52  
53  
54  
55  
56  
57  
58  
59  
60

## DISCONTINUING ANTIDEPRESSANT MEDICATION

**METHODS****Study context**

This qualitative process evaluation was embedded within the PREVENT trial, a multicentre, single blind, parallel randomised controlled trial, which investigated whether MBCT-TS ( $n = 212$ ) was superior to maintenance ADMs ( $n = 212$ ) for the prevention of depressive relapse or recurrence over 24 months (trial design is described in Kuyken et al.).[14-17] The trial found that MBCT-TS was not superior to maintenance ADM in preventing depressive relapse over two years; both treatments had similar outcomes in terms of depressive relapse, as well as residual depressive symptoms and quality of life.[14] The South West Research Ethics Committee approved the trial [09/H0206/43], which was registered with the International Standard Randomised Controlled Trial Register [ISRCTN26666654] and the Medicines and Healthcare products Regulatory Agency [2009-012428-10]. We present a Statement Concerning Reflexivity in the online supplementary materials, which outlines the experience and background of the authors, to acknowledge our theoretical positions and values in relation to the present study.[18]

**Participants**

Participants in the PREVENT trial were recruited from 95 general practices in urban and rural settings in four UK centres, in addition to self-referral.[14] Inclusion criteria were a diagnosis of recurrent major depressive disorder in full or partial remission according to the Diagnostic and Statistical Manual of Mental Disorders-IV;[19] three or more previous major depressive episodes; age 18 years or older; and on a therapeutic dose of maintenance antidepressant drugs in line with the British National Formulary (BNF) and NICE guidance.[4] Exclusion criteria were a current major depressive episode, comorbid diagnoses of current substance misuse; organic brain damage; current or past psychosis, including bipolar disorder; persistent antisocial behaviour; persistent self-injury needing clinical management or therapy; and formal concurrent psychotherapy. All participants gave informed consent before participating in the trial. The full process of recruitment for the PREVENT trial is described in Kuyken et al.[17]

## DISCONTINUING ANTIDEPRESSANT MEDICATION

1  
2  
3 The present study examined a sub-group of participants from the PREVENT trial ( $n = 42$ )  
4 allocated to the MBCT-TS arm of the trial. Of the 212 participants allocated to receive MBCT-TS, 176  
5 received an adequate dose of treatment (attended four or more group sessions of therapy).[14] The  
6 researchers purposively sampled a sub-group of these participants ( $n = 46$ ) to represent a spread of  
7 characteristics and experiences with respect to: whether they reported their childhood as having higher  
8 or lower levels of abuse, treatment response (relapse/no relapse to a major depressive episode), and  
9 ADM discontinuation profile across the 24 month follow-up period (discontinued ADMs, discontinued  
10 ADMs but subsequently resumed them, tapered ADMs but never fully discontinued, never tapered or  
11 discontinued ADMs).[14] Of the 46 people invited to interview, 42 agreed, which comprised the final  
12 sample. Of the four who declined, two had moved away from the area, one was not interested in  
13 participating and one participant had changed their contact details and could not be reached.  
14 Interviewees did not differ in either baseline characteristics or trial outcomes from broader sample of  
15 PREVENT participants randomised to MBCT-TS (see Table 1).  
16  
17  
18  
19  
20  
21  
22  
23  
24  
25  
26  
27  
28  
29  
30  
31  
32  
33  
34  
35  
36  
37  
38  
39  
40  
41  
42  
43  
44  
45  
46  
47  
48  
49  
50  
51  
52  
53  
54  
55  
56  
57  
58  
59  
60

## DISCONTINUING ANTIDEPRESSANT MEDICATION

**Table 1.** Characteristics of the sample.

|                                                       | Interviewed<br>(N = 42) | All MBCT-TS Participants<br>(N = 212) |
|-------------------------------------------------------|-------------------------|---------------------------------------|
| <b>Demographic Characteristics</b>                    |                         |                                       |
| Female (%)                                            | 31 (74)                 | 151 (71)                              |
| White (%)                                             | 42 (100)                | 210 (99)                              |
| Age (in years)                                        |                         |                                       |
| <i>M (SD)</i>                                         | 51.88 (10.51)           | 50 (12)                               |
| Range                                                 | 25 – 72                 | 22 – 78                               |
| <b>Psychiatric Characteristics</b>                    |                         |                                       |
| Previous episodes                                     |                         |                                       |
| < 6 episodes                                          | 26 (62)                 | 120 (57)                              |
| ≥ 6 episodes                                          | 16 (38)                 | 92 (43)                               |
| Co-morbid mental health diagnoses                     |                         |                                       |
| 1 or more (%)                                         | 15 (36)                 | 75 (35)                               |
| Treatment preference at Baseline                      |                         |                                       |
| MBCT-TS preference (%)                                | 34 (81)                 | 150 (71)                              |
| ADM preference (%)                                    | 1 (2)                   | 12 (6)                                |
| No preference (%)                                     | 7 (17)                  | 50 (24)                               |
| Treatment outcome                                     |                         |                                       |
| Relapse                                               |                         |                                       |
| <i>n (%)</i> that relapsed during the follow-up phase | 23 (55)                 | 94 (44)                               |
| Antidepressant usage during the follow-up phase       |                         |                                       |
| Stopped and stayed stopped (%)                        | 13 (31)                 | 67 (32)                               |
| Stopped and resumed (%)                               | 9 (21)                  | 57 (27)                               |
| Reduced but never stopped (%)                         | 9 (21)                  | 29 (14)                               |
| Never stopped or reduced (%)                          | 11 (26)                 | 23 (11)                               |
| Residual depression symptoms                          |                         |                                       |
| BDI score at baseline, <i>M (SD)</i>                  | 15.90 (11.35)           | 13.8 (12.4)                           |
| BDI score at 24 month follow-up, <i>M (SD)</i>        | 12.39 (12.25)           | 11.6 (10.9)                           |

Note. BDI = Beck Depression Inventory

## DISCONTINUING ANTIDEPRESSANT MEDICATION

**MBCT-TS intervention**

MBCT-TS comprised MBCT delivered in line with the published treatment manual,[20] but adapted to include a greater focus on developing a relapse/recurrence signature and response plan that explicitly included participants' reduction/discontinuation of ADM (see Kuyken et al.[17] for more detail). The programme involved eight 2¼-hour group sessions, normally over consecutive weeks, with up to four refresher sessions offered in the year following the end of the eight-week programme. Researchers encouraged participants in the MBCT-TS arm to taper and discontinue their maintenance ADMs at several points from the middle of the MBCT-TS course onwards, and provided information to General Practitioners (GPs) and participants about typical tapering/discontinuation regimes and possible withdrawal effects. If participants experienced a relapse/recurrence during the course of the trial, researchers encouraged them to discuss the most appropriate treatment with their GP and made no further requests that they consider tapering/discontinuing their ADMs. Participants in the MBCT-TS arm who did not taper or discontinue their ADM remained in the trial.

**Qualitative data collection**

The present study used interviews and written feedback booklets to gather participants' experiences of MBCT-TS and ADM use during the trial. We combined each participant's interview and written feedback booklet data to form a single account of their experiences during the trial and used this as the basis of the analyses in the current report.

**Interviews**

Interviews were semi-structured and conducted face-to-face in participants' homes by trained researchers, approximately 24 months after MBCT-TS. They lasted between 45 minutes and one hour and explored experiences during the follow-up period, with questions addressing times of wellness, early signs of potential depressive relapse, and relapses. Questions explored the use and perceived value of mindfulness techniques, use of ADMs, and their combination. We tailored interviews to the specific profile of each participant using a 'timeline' prepared in advance and amended by the participant at the

## DISCONTINUING ANTIDEPRESSANT MEDICATION

1  
2  
3 interview, which summarised each participant's ADM use, relapses, and significant life events, as  
4 reported to the research team during the trial. The interviews were deliberately broad in focus to allow  
5 for the use of arising data to answer a number of distinct research questions, of which the role of MBCT-  
6 TS in ADM tapering was one. Interviews were recorded and transcribed for analysis. The interview  
7 schedule is provided in the online supplementary materials.  
8  
9  
10  
11  
12

### Written feedback booklets

13  
14  
15  
16  
17  
18 One month after completing MBCT-TS all trial participants were invited to complete a feedback booklet  
19 addressing attitudes towards, and experiences of, taking and reducing antidepressant medication;  
20 experiences of taking part in MBCT-TS, and MBCT-TS practices; and the impact of MBCT. In addition  
21 to the above, participants received a further feedback booklet 24 months later, which asked the same  
22 questions as the first booklet but also included questions focussed on participants' experiences in the  
23 follow-up period and basic data on the amount and type of mindfulness practice. The booklets are  
24 provided in the online supplementary materials. Mixed methods analysis of feedback booklet data from  
25 the complete sample, including participants who did not complete a qualitative interview and those who  
26 were allocated to the non-MBCT-TS arm of the trial, will be reported elsewhere.  
27  
28  
29  
30  
31  
32  
33  
34  
35  
36  
37

### Public and patient involvement

38  
39  
40  
41 The PREVENT trial benefited from the expertise of many people with lived experience of  
42 mental health difficulties including a number of members of a locally organised voluntary group called  
43 the Lived Experience Group (LEG). The LEG assisted the PREVENT trial at every stage of its  
44 development including both the interview schedule and written feedback booklets. There were reviewed  
45 and then trialled by several members of the LEG who suggested a number of fundamental changes. A  
46 member of the LEG provided specific training to the research staff that conducted interviews and also  
47 attended all Trial Management Group and Trial Steering Committee meetings.  
48  
49  
50  
51  
52  
53  
54  
55

### Data Analyses



## DISCONTINUING ANTIDEPRESSANT MEDICATION

1  
2  
3 We used thematic analysis as our analytic approach.[18] First, we selected eight participants  
4 with a range of ADM discontinuation journeys during the trial period: two who had discontinued ADMs  
5 and remained ADM-free; two who had discontinued ADMs and subsequently resumed; two who had  
6 never tapered or discontinued ADMs; and two who had tapered but never discontinued ADMs. Four  
7 researchers (AT, CC, JR and WK) independently analysed the interview transcripts and accompanying  
8 one-month and 24-month feedback booklets for each participant. In this phase, we conducted inductive  
9 analysis, with each researcher developing a preliminary coding frame. These frames were then  
10 integrated through discussion to remove redundancies and ensure breadth. This collaboratively  
11 produced, inductive coding frame was then combined with deductive codes developed from key  
12 literature on participant experiences of MBCT,[21] and ADM use,[22,11] to establish a working coding  
13 frame.  
14  
15  
16  
17  
18  
19  
20  
21  
22  
23  
24  
25

26  
27 The lead researcher (AT) then analysed the 42 interviews and accompanying booklets against  
28 this coding frame, using NVivo 11 software. AT, CC, and JR met at regular intervals to discuss  
29 additional emerging codes and arising themes and, if deemed appropriate, integrated these into the  
30 coding frame. Midway through coding, AT sought peer feedback through (1) presentation of emerging  
31 findings at an internal research meeting and (2) at a symposium focused on antidepressant tapering at  
32 an international conference.[23] Feedback from these presentations helped clarify which themes were  
33 particularly important, and in particular helped the researchers reflect on those that related specifically  
34 to the *interaction between* the experience of ADM tapering and discontinuation and learning from  
35 MBCT-TS. Once the data were fully coded, the researchers reviewed the themes in the light of the core  
36 research question. These were discussed with the wider authorship group, whose input was used to  
37 reduce redundancy across themes, and highlight their interactions. Finally, we identified indicative  
38 cases that illustrated the different ways in which the themes coalesced within individuals to influence  
39 their experiences of ADM use over the 24-month period.  
40  
41  
42  
43  
44  
45  
46  
47  
48  
49  
50  
51  
52  
53  
54  
55  
56  
57  
58  
59  
60

## DISCONTINUING ANTIDEPRESSANT MEDICATION

## RESULTS

The qualitative analysis of the written and interview data yielded seven over-arching themes, each with a number of constituent sub-themes (see Table 2). Below we provide a narrative account of each theme and its constituent sub-themes, illustrating these with extracts from participants' accounts. Emergent themes overlap at a conceptual level and relate in complex ways within individual cases. Each person's narrative, whilst sharing common themes, also described a unique journey over the follow-up period. Therefore, in addition to describing the distinct themes, we also present five case examples to illustrate some of these different journeys as people participate in an MBCT-TS programme and consider ADM tapering/discontinuation (Box 1). The cases were selected to represent the commonality of themes but diversity of experiences and individual stories of the people in our study.

**Table 2: Summary of Themes**

| Theme                                         | Sub-themes                                                                                                                                                                                                                                                                                                                                                                  |
|-----------------------------------------------|-----------------------------------------------------------------------------------------------------------------------------------------------------------------------------------------------------------------------------------------------------------------------------------------------------------------------------------------------------------------------------|
| <b>Beliefs about the causes of depression</b> | <p><i>Neurochemical disruption</i>: "serotonin deficiency" as a dominant belief about the cause of depression.</p> <p><i>Learning a new model</i>: the impact of learning psychological model and techniques on decisions about ADM tapering/discontinuation.</p> <p><i>Bridging models</i>: people's attempts at integrating their diverse perspectives on depression.</p> |
| <b>Control</b>                                | <p><i>Managing Expectations</i>: feeling optimistic or sceptical about gaining control over ADM use/discontinuation.</p> <p><i>Agency and responsibility</i>: more agency and responsibility to manage depression symptoms by learning psychological skills that could take the place of ADMs.</p>                                                                          |
| <b>Acceptance</b>                             | <p><i>Resolving shame and denial</i>: psychological therapy supporting resolution of shame and denial surrounding depression and ADMs.</p> <p><i>Self-care</i>: more favourable attitudes towards self-care, using</p>                                                                                                                                                      |

## DISCONTINUING ANTIDEPRESSANT MEDICATION

|                             |                                                                                                                                                                                                                                                                                                                    |
|-----------------------------|--------------------------------------------------------------------------------------------------------------------------------------------------------------------------------------------------------------------------------------------------------------------------------------------------------------------|
|                             | <p>psychological techniques and/or ADMs.</p> <p><i>Perspectives on relapse</i>: diverse and evolving attitudes towards depressive relapse/recurrence.</p>                                                                                                                                                          |
| <b>Quality of Life</b>      | <p><i>Experiencing emotions more fully</i>: the impact of different treatments on the experience of emotions.</p> <p><i>From coping to enjoying life</i>: Psychological therapy helping people to move beyond coping towards enjoying life.</p>                                                                    |
| <b>Tapering process</b>     | <p><i>Pace of reduction</i>: decisions about method of tapering ADMs and impact on subsequent outcomes.</p> <p><i>Managing withdrawal effects</i>: psychological therapy helping to cope with the period of withdrawal symptoms.</p>                                                                               |
| <b>Interactions with GP</b> | <p><i>Presence and support</i>: availability and responsiveness of GP and impact on ADM tapering/discontinuation.</p> <p><i>Following advice</i>: different attitudes towards seeking and following GP advice on tapering/discontinuation.</p>                                                                     |
| <b>Timing</b>               | <p><i>Feeling vulnerable</i>: current depression symptoms and difficult life circumstances contributing to reservations about ADM tapering/discontinuation.</p> <p><i>Sequencing of treatments</i>: reflections on potential sequencing of different treatments to support recovery from recurrent depression.</p> |

## DISCONTINUING ANTIDEPRESSANT MEDICATION

**Beliefs about the causes and treatment of depression**

This over-arching theme describes participants' beliefs about the causes of depression and articulates how these beliefs influenced their treatment decisions. Prior to the programme, many participants described their understanding of depression as caused by a neurochemical disruption of neurotransmitters in the brain. During MBCT-TS they learned a psychological, cognitive-behavioural model of depression, and how this model could be used to develop strategies to prevent depressive relapse and recurrence. Whether people learned and used this model was variable, and seemed to be influenced by their initial experiences of treatment, which had implications for their subsequent treatment decisions. This theme comprises three sub-themes.

## Neurochemical disruption

Prior to the programme, many participants thought they had experienced recurrent depression due to a neurochemical disruption in their brain, often citing specifically a deficiency or imbalance of the neurotransmitter serotonin. Participants viewed medication as a way to correct this issue and made parallels to biomedical disorders, viewing ADMs as a "*physiological need*" in the same way that "*diabetics require insulin*" because "*there is some chemical missing.*" (2102; *Written feedback, Never tapered or discontinued*). For instance, Annie explained that she went on ADMs because her doctor told her that she had lower levels of serotonin than other people (see Box 1). This belief appeared to influence expectations about psychological therapy, as some participants stated that they did not understand how "*mindfulness would be able to counteract depression [...] if it's generated by a chemical imbalance.*" (1031, *Interview, Never tapered or discontinued*). Other people said that they had not given much thought to why they were depressed or how ADMs worked: "*Happy pills [...] I've never really given it a great deal of thought exactly what they do to be honest. [...] I just know I don't feel so bad with them.*" (2123, *Interview, Tapered but never discontinued*).

## Learning a new model

## DISCONTINUING ANTIDEPRESSANT MEDICATION

Participants described how their views on the causes of depression evolved during and following the MBCT-TS programme. Despite some of the initial reservations described above, participants described an open mind as key to engaging with the new psychological model, in which their thoughts, behaviours, and emotions played a role in depressive relapses and recurrences: *“in the first sessions [...] I switched from being highly sceptical to very interested very quickly”* (1203, Interview, Discontinued). Some participants articulated a move away from *“treating depression as a disease, like if you had a toothache, so you took pills”*, and were surprised because they *“hadn’t thought that there was an alternative”* (1069, Interview, Discontinued). They began to feel confident to discontinue ADMs with the support of psychological therapy. In addition, people described how the programme gave them more awareness of how external factors, such as relationships or financial situations, could trigger or exacerbate depressive relapses and recurrences. On the other hand, some participants found it more difficult to engage in the programme and found themselves *“rebellious against it”* because they did not have *“intellectual confidence in the process.”* (3105; Written feedback, Never tapered or discontinued). People described how their initial treatment experiences influenced their attitudes: those who felt that the techniques were helping them to manage depressive relapse/recurrence often endorsed the psychological model. On the other hand, others who experienced deterioration in mood or relapse sometimes reported that they had re-considered bio-medical explanations, and decided to resume or remain on ADMs: *“I really thought depression was a psychosomatic problem, but I am not so sure now. I did give it my best shot, using the mindful techniques, but I still fell into the pit of despair [...] I feel that my depression is caused by a chemical imbalance in my body which, at present, is only helped by taking medication.”* (2200; Written feedback, Tapered but never discontinued).

## Bridging models

Although some participants took a dualistic stance of depression as either biomedical or psychological, favouring one model over the other, many did not see the two models as distinct and found ways to integrate these models. For instance, they conceptualised that *“antidepressants hold onto the chemical in your body ‘cause you’re not making enough of it yourself”*, while MBCT-TS allows you to *“focus your mind onto how to make your own.”* (1139, Interview, Never tapered or

## DISCONTINUING ANTIDEPRESSANT MEDICATION

1  
2  
3 *discontinued*). It seemed that participants who viewed these models as compatible were more open to  
4 using ADMs and using psychological techniques as an additional way to support their recovery, rather  
5 than viewing them as competing treatments. Furthermore, when participants observed the diversity of  
6 other people's experiences on the programme, some formed the opinion that there are "*all sorts of*  
7 *depressions*" underpinned by different causes "*just as there are colds and flu's and viruses.*" (3105,  
8 *Interview, Never tapered or discontinued*). As such, some reasoned that different people would  
9 require different treatment decisions to support recovery: "*My depression is not necessarily the same*  
10 *as other people's [...] The right combination of changing lifestyle, specific therapies, medication*  
11 *whatever else it takes – that seems to be different for different people.*" (3109, *Interview, Never*  
12 *tapered or discontinued*).

**Control**

23  
24  
25  
26  
27  
28 This over-arching theme describes people's perceived sense of control over their ability to  
29 discontinue ADMs. As captured in the written data and when reflecting on experiences with ADMs and  
30 therapies prior to the programme, people expressed various fears about the process of ADM  
31 discontinuation, but many hoped that a psychological programme could support them and give them  
32 more control over their treatment choices. During MBCT-TS, people spoke about being better able to  
33 manage their vulnerability to depressive relapse, by using the skills and techniques they learned on the  
34 programme. While enhanced feelings of personal agency were largely viewed as a positive and  
35 increased many people's confidence to taper and discontinue ADMs, this was not always the case, and  
36 some felt the pressure of having more responsibility to manage their condition. This theme comprises  
37 two sub-themes.  
38  
39  
40  
41  
42  
43  
44  
45  
46  
47  
48

## Managing expectations

49  
50  
51  
52  
53 Before the trial, many people expressed a preference to come off their ADMs, but said they  
54 remained on ADMs because they felt out of control and afraid that depression would return if they  
55 discontinued ADMs: "*[I] definitely didn't want to regress as the last bout of depression was my worst.*  
56 *[I was] at a stage where I had almost accepted taking long-term medication although not entirely happy.*  
57  
58  
59  
60

## DISCONTINUING ANTIDEPRESSANT MEDICATION

1  
2  
3 *I knew they helped and didn't have anything else to take the place of the tablets.” (1087; Written*  
4 *feedback, Tapered but never discontinued).* Many participants said they agreed to participate in the trial  
5  
6 because they believed psychological therapy would teach them skills to manage discontinuation, and  
7  
8 liked *“the idea of coming off the drugs in a controlled, relatively safe environment and of being offered*  
9 *the "tools" to cope without them.” (4057; Written feedback, Discontinued).* Others however had much  
10  
11 lower expectations based on their notions of what the programme would entail and were *“very*  
12 *sceptical”*, and thought *“it’s not going to work because I can’t change my life drastically like that.”*  
13  
14 *(2016, Interview, Discontinued and resumed, then discontinued).*

## Agency and responsibility

21  
22  
23  
24 After taking part in the programme, many participants described a change in their sense of  
25 control about depression, describing a shift in personal agency from a *“helpless victim of*  
26 *circumstance”*, to having more *“control of my feelings and my life” (1123; Written feedback, Tapered*  
27 *but never discontinued).* For instance, George said that before the course, he would fall into depressive  
28  
29 episodes very suddenly and without warning, whereas the mindfulness skills gave him more awareness  
30  
31 and control to act and prevent relapses before they occurred (see Box 1). In general, participants  
32  
33 attributed to the skills and techniques they had learned on the programme, which helped them to manage  
34  
35 their vulnerability to depressive relapse and recurrence. For instance, they reported an increased ability  
36  
37 to recognise the early warning signs of depressive relapse and take steps to respond, by applying  
38  
39 mindfulness or cognitive-behavioural techniques from a ‘toolbox’, including things like meditation,  
40  
41 activity scheduling, or enlisting social support: *“Before the trial, I didn’t have the tools to recognise*  
42 *what was happening. [...] I didn’t even know I was getting depressed. [Now] if things are difficult I can*  
43 *do something about it.” (1203, Interview, Discontinued).* This reduced many people’s fears about  
44  
45 coming off ADMs, because they felt they had the capacity to prevent or contain depressive relapses.  
46  
47  
48  
49  
50  
51  
52  
53  
54  
55  
56  
57  
58  
59  
60  
Participants also articulated that learning how they could have more agency over their thoughts,  
feelings, and behaviours led to an increased sense of responsibility to manage their wellbeing. Most  
participants viewed this as positive, especially if they were able to use the techniques to manage  
relapse/recurrence. Some people said they preferred this approach to resuming ADMs, because it made

## DISCONTINUING ANTIDEPRESSANT MEDICATION

1  
2  
3 recovery feel more like a personal achievement: *“Once I’ve fallen and I realise that I am depressed, I*  
4 *take myself off and say do 3 or 4 meditations a day. [...] Which to me is better than taking a pill, because*  
5 *I know I’ve worked to get myself well.”* (2016, Interview; Written feedback, Discontinued and resumed,  
6 *then discontinued*).

7  
8  
9  
10  
11  
12 However, not all participants viewed it positively to have more agency and responsibility over  
13 their wellbeing. In particular, some participants described how this made them feel like it was their fault  
14 if they relapsed or felt they had to resume ADMs: *“I feel sad and disappointed that stopping [ADMs]*  
15 *made me feel low again. [...] It makes me feel I’m not right in the head compared to others. I also feel*  
16 *annoyed with myself for not utilising MBCT skills learnt better.”* (2123; Written feedback, Discontinued  
17 *and resumed*). Furthermore, a substantial number of participants expressed the challenge of finding the  
18 time, motivation, or self-discipline to keep up a regular mindfulness practice outside of the group  
19 sessions. Therefore, the sense of control did not always feel stable, as it was contingent on finding time  
20 to practice and *“do it religiously, otherwise I would be fearful of it not being enough.”* (2102; Written  
21 *feedback, Never tapered or discontinued*). Some were disappointed when they realised that  
22 psychological therapy was not an *“all-encompassing cure”* (1222, Interview, Discontinued and  
23 *resumed*) and would involve an active and ongoing process of engagement with the techniques learned.

### Acceptance

24  
25  
26  
27  
28  
29  
30  
31  
32  
33  
34  
35  
36  
37  
38  
39  
40  
41  
42 This over-arching theme describes people’s feelings of acceptance towards their history of  
43 depression and their ongoing need to manage their risk of relapse and recurrence. Before the trial, many  
44 people expressed a sense of shame around taking ADMs, feeling they labelled them as an ill person.  
45 After the trial, people described an increased sense of acceptance regarding depression, and more  
46 motivation to engage in self-care to support their ongoing recovery. This self-management included  
47 either ADMs and/or the psychological techniques for different people. This theme comprises three sub-  
48 themes.  
49  
50  
51  
52  
53  
54  
55

### Resolving shame and denial



## DISCONTINUING ANTIDEPRESSANT MEDICATION

1  
2  
3 Before the trial, many described feelings of low self-esteem, feeling “*inadequate*” or unable to  
4 cope with life compared to other people, and treating depression as a “*guilty secret*” (1123; *Interview,*  
5 *Tapered but never discontinued*). Taking ADMs had helped some to resolve this, by reducing the  
6 symptoms and allowing them to return to being a “*normal contributing person in society*” (2200;  
7 *Interview, Tapered but never discontinued*). However, others expressed that taking ADMs still labelled  
8 them with a disease, experiencing an underlying feeling that they were “*not a well person*” (2102;  
9 *Interviews, Never tapered or discontinued*) if they needed to take medication. For these reasons, some  
10 people described how before the trial, they were in denial about having depression, and “*couldn’t even*  
11 *or wouldn’t even admit to that.*” (1031, *Interview, Never tapered or discontinued*). After the  
12 programme, some participants described how for the first time, they felt able to name their condition as  
13 depression. Participants discussed non-specific effects around normalisation within a group setting, i.e.  
14 how meeting other people in the programme had made them realise that depression was not a negative  
15 aspect of their own self-identity, but an aspect of common human experience: “*You realise it is part of*  
16 *the human condition rather than you.*” (1128; *Interview, Never tapered or discontinued*), and it  
17 “*confirmed that I am a human, worthwhile person*” (2176; *Written feedback, Discontinued and*  
18 *resumed*). This led to increased feelings of acceptance towards depression, because participants  
19 experienced a shift away from viewing themselves as abnormal, to seeing depression as a more  
20 acceptable response to life’s difficulties: “*Giving yourself credit [...] ‘cause at the end of the day [...]*  
21 *our human brain is quite a complex thing, isn’t it? [...] There’s nothing wrong in feeling like it.*” (2140;  
22 *Interview, Discontinued and resumed*).

## Self-care

23  
24  
25  
26  
27  
28  
29  
30  
31  
32  
33  
34  
35  
36  
37  
38  
39  
40  
41  
42  
43  
44  
45  
46  
47  
48  
49  
50  
51  
52  
53  
54  
55  
56  
57  
58  
59  
60  
Participants described how developing more acceptance towards their condition affected their  
attitudes towards self-care. They said that accepting their vulnerability to depression allowed them to  
“*look at solutions*” and that they finally had “*consent to actually do something about it*” (1031,  
*Interview, Never tapered or discontinued*). People described how they increasingly accepted that they  
needed to take care of themselves, and explained how the programme had taught them legitimate ways  
to do this, such as using skills like meditation: “*Previously was a mindset [...] that I wasn’t allowed to*

## DISCONTINUING ANTIDEPRESSANT MEDICATION

1  
2  
3 *help myself feel better. [...] Whereas this felt a way that I could do it without mollycoddling myself.”*  
4  
5 *(1031, Interview, Never tapered or discontinued).* Participants also described how the programme had  
6  
7 reframed self-care not as something “fluffy”, but as “practical” and a necessary part of their ongoing  
8  
9 recovery: “*It doesn’t make you any less male of course. [Chuckles] Or any less powerful.” (1203,*  
10  
11 *Interview, Discontinued).* In some cases, this new attitude towards self-care caused a shift such that  
12  
13 people felt more acceptance towards taking ADMs: “*I don’t feel any more when I take my pill every*  
14  
15 *morning that there’s something wrong with me”* as they recognised it was important to do “*everything*  
16  
17 *in my power to help myself.” (1177, Interview, Tapered but never discontinued).* Some participants also  
18  
19 described how originally they had taken ADMs unwillingly, whereas now they took ADMs as an act of  
20  
21 effective self-management: “*I used to hate taking them [ADMs] I accept [now] it’s all about looking*  
22  
23 *after yourself isn’t it?” (3103; Interview, Discontinued and resumed).*

## Perspectives on relapse

24  
25  
26  
27  
28  
29  
30  
31  
32  
33  
34  
35  
36  
37  
38  
39  
40  
41  
42  
43  
44  
45  
46  
47  
48  
49  
50  
51  
52  
53  
54  
55  
56  
57  
58  
59  
60  
Participants also described a change in their feelings of acceptance towards depressive relapse and recurrence. Although many people did not experience a depressive episode during the trial period, those who did described varying perspectives on this. For instance, when Greta experienced a deterioration in mood, she interpreted this as a sign that the programme had been a “failure” and she resumed taking ADMs (see Box 1). However, this was not always the case, and many people described how participating in MBCT-TS changed their attitude towards relapse/recurrence. In particular, some people felt more able to accept periods of depression and approach them in a different way, “*thinking it was a phase that one was going through and sort of accepting, okay this is how you’re feeling today” (1159; Interview, Discontinued and resumed).* Some people reported that they no longer wanted to “blank out their negative emotions”, and so did not resume ADMs, even if they relapsed: “*it’s definitely helped me to realise that they [negative emotions] are a part of me as well.” (4057, Interview, Discontinued).* Many people felt more resourced by the programme, and said that they could better manage the periods of low mood or depression. This corresponds with George’s experience. George did not resume ADMs when he relapsed, and instead decided to practice MBCT-TS skills, which helped him to reach remission again (see Box 1).

## DISCONTINUING ANTIDEPRESSANT MEDICATION

**Quality of Life**

People reflected on the ways in which different treatments influenced their overall quality of life. They discussed how decision-making around ADM tapering and discontinuation reflected a weighing up of different priorities: on the one hand, to stave off depression, and on the other, to restore positive emotionality into their lives. People also discussed how the programme supported them to move from a place of coping, to a position where they could enjoy and appreciate their lives, regardless of whether they tapered and/or discontinued ADM or remained on them. This theme comprises two sub-themes.

**Experiencing emotions more fully**

Upon reflecting on their experiences with ADMs, some participants said that while ADMs lessened their low mood, at the same time they “*dampen all other emotions*”, for instance, they could not feel “*blissfully happy, couldn't get angry, and in hindsight feel I was sedated.*” (4057, *Written feedback, Discontinued*). In the context of depression, some people viewed this numbing effect as helpful, and reflected that while ADMs “*take away the euphoria that you would get when you've done something really, really, really good*”, this was “*a small price to pay really for not having the really dark times.*” (2200; *Interviews, Tapered but never discontinued*). However, many people thought that this had negatively affected their quality of life, especially in the cases where they found it hard to experience positive emotions. This appeared to influence people's decision to taper or discontinue ADMs, because they said that restoring their emotional range was an important part of their long-term vision of recovery: both George and Claire described this as a key motivator to discontinue their ADMs (see Box 1). Indeed, people described how their emotional capacity increased after coming off ADMs: “*I am more alive: my emotions aren't "levelled out" anymore. I can be happy, sad, angry or calm instead of just bland.*” (4057, *Written feedback, Discontinued*), albeit some people found it a bit of a “*shock*” at first, when faced with “*very extreme emotions and feelings*” again (1212; *Feedback booklets, Discontinued*). Therefore, people found it helpful that the programme taught them techniques to help manage this transition: “*I definitely used mindfulness during coming off the tablets to [...] be*

## DISCONTINUING ANTIDEPRESSANT MEDICATION

1  
2  
3 *aware what's going on inside and [...] calm myself down, to have those little islands of tranquillity."*  
4  
5 *(4057, Written feedback, Discontinued).* On the other hand, some participants said that despite not  
6 tapering or discontinuing ADMs, the programme had helped them to cultivate more positive emotions,  
7 and appeared to increase their quality of life on ADMs: *"I suppose the mindfulness in that respect has*  
8 *helped because [...] by slowing yourself down you can [...] capture some of that [...] joy of life that*  
9 *possibly I would have lost."* (2200; Interviews, Tapered but never discontinued).

### From coping to enjoying life

16  
17  
18  
19  
20 Many people reflected that, given their history of depression, they had been grateful for the  
21 periods of time where they were simply coping or functioning. However, they said that the programme  
22 had helped them to move beyond that mind-set, and to develop more wellbeing and appreciate life:  
23 *"What has changed? I think my outlook on life, I love life, I really do [...] People said to me [...] before*  
24 *you used to skulk into the room, now you light up the room. [...] I do enjoy life now, where I didn't*  
25 *before."* (2016, Interview, Discontinued, resumed, then discontinued). They valued that the programme  
26 had an active focus on positive functioning, and encouraged them to take part in activities that brought  
27 happiness and joy into their life. Participants described this as an active process, facilitated by a sense  
28 of having more control and autonomy over making positive decisions in their life: *"I rearranged my*  
29 *life so that the things I do now are things that I enjoy and want to do."* (1203, Interviews, Discontinued).  
30  
31 These benefits were not limited to those people who discontinued ADMs, but were an additive benefit  
32 for many participants who remained on or resumed ADMs: *"I am now making bigger future plans to*  
33 *make my life better and introducing new ventures."* (1031, Written feedback, Never tapered or  
34 discontinued).

### Tapering process

50  
51  
52  
53 Many participants described the process of tapering and discontinuing ADMs, and attempted  
54 to justify the different outcomes that they experienced. This over-arching theme describes participants'  
55 descriptions of the tapering process, and articulates what they viewed as helpful or hindering to the  
56 process of discontinuation. This theme comprises two sub-themes.

## DISCONTINUING ANTIDEPRESSANT MEDICATION

## Pace of reduction

Participants discussed the pace at which they tapered ADMs, and how they perceived this to have influenced their outcomes. Some people who were worried about coming off ADMs shared that they exercised caution, testing out the psychological techniques for a set period and tapering slowly. They said this was helpful as it gave them time to learn to use the psychological techniques before giving up the support of their ADMs, *“by doing it slowly, you are learning those skills and you are finding out how you can use it. [Then] you can start dropping it [ADM] at your own pace.”* (1075; Interviews, Discontinued). In comparison, those who were keen to come off ADMs and were less fearful of the consequences described tapering more quickly. Although the programme had included explicit guidance to taper gradually, participants’ reports suggested that many people had gone against this advice, and were looking for a *“quick fix”* to *“get off the pills as quick as possible”* (2131, Interview, Tapered but never discontinued). However, upon reflection many people thought, *“perhaps that wasn't the answer perhaps the thing ought to be graded on over a longer period.”* (2131, Interviews, Tapered but never discontinued). Some of these participants reflected that in retrospect they should have been more cautious, and tapering too quickly had led to poorer outcomes: *“I reduced my tablets too quick and paid the price by having to get straight back to the full dose”* (2016, Interview; Written feedback, Discontinued and resumed, then discontinued). However, some people, like Claire, who did not successfully discontinue on their first attempt reported how they had then tried again, tapering more gradually and with more success (see Box 1).

## Managing withdrawal effects

People said that the programme had helped them to cope with withdrawal effects during and after tapering/discontinuing ADMs. They described how the group and the meditation techniques provided ongoing support to manage this period: *“I used meditation techniques [...] tried to treat myself with pleasurable experiences and told myself that this would pass over. [...] I had a network of fellow participants and a trustworthy instructor. All of this put me in a position of confidence that it would work this time.”* (4057, Written feedback, Discontinued). In addition, people said that they were better

## DISCONTINUING ANTIDEPRESSANT MEDICATION

1  
2  
3 able to differentiate the side effects of ADM withdrawal from a depressive relapse. For instance, Mandy  
4 said that in the past, withdrawal effects had been the biggest hindrance to tapering ADMs, because she  
5 had always mistaken them for a depressive relapse and resumed her medication. On the programme,  
6 she learned how to differentiate between these effects and “*real relapses*”, and said that tapering was  
7 relatively “*easy*” this time around (see Box 1). Indeed, some people who had attempted discontinuation  
8 before the trial reflected how their GPs may have “*misdiagnosed*” their withdrawal symptoms “*as*  
9 *recurring depression*”, whereas this time they “*knew what was coming*” (4057, *Written feedback,*  
10 *Discontinued*).

**Interactions with GP**

21  
22  
23  
24 Participants’ described their interactions with their GPs when contemplating and/or  
25 commencing the process of ADM tapering and discontinuation. This over-arching theme captures what  
26 aspects of this relationship participants viewed as helpful and the extent to which these interactions  
27 influenced ongoing treatment decisions. This theme comprises two sub-themes.

**Presence and support**

33  
34  
35  
36  
37 Participants discussed the relationship that they had with their GP and its influence on the  
38 tapering process. In general, participants found it supportive if their GPs were easy to access throughout  
39 the process of discontinuation: “*Knowing that I could ring the doctor and say, "I need to make an*  
40 *appointment, I need to come and see you."* There was always that net underneath me to catch me if I  
41 *was falling and I couldn't stop it.*” (2090, *Interview, Discontinued*), whereas some participants said they  
42 found it “*very difficult*” to access their GPs, and so felt “*unsupported*” (1123, *Written feedback,*  
43 *Tapered but never discontinued*). Participants reported a more positive attitude to the programme if  
44 their GP had endorsed it, and some said they had only been convinced to take part in the trial because  
45 their GPs said they had done a mindfulness course. When GPs encouraged their patients to use the  
46 mindfulness practices, this appeared to be associated with better engagement and subsequent success in  
47 ADM tapering and discontinuation: “*I did reach a stage where I went to see my G.P. as the depression*  
48  
49  
50  
51  
52  
53  
54  
55  
56  
57  
58  
59  
60

## DISCONTINUING ANTIDEPRESSANT MEDICATION

1  
2  
3 *was returning. [...] We decided that I should try the exercises before trying pills. I did not need to go*  
4  
5 *back on them yet [...] My GP is a great help.” (2090, Written feedback, Discontinued).*  
6  
7

#### 8 Following advice

9

10  
11 Participants differed in the extent to which they sought and followed the advice of their GPs.  
12  
13 For instance, some participants described that they remained on their ADMs at their GP’s suggestion:  
14  
15 *“My GP would not allow me to come off my antidepressant or reduce it because I had been on them so*  
16  
17 *long term. [I am] relieved but also a bit disappointed.” (1108; Written feedback, Never tapered or*  
18  
19 *discontinued).* This adherence to medical advice seemed to be greater for participants who had more  
20  
21 concerns about discontinuation. For instance, Claire, who relapsed the first time that she had attempted  
22  
23 tapering and discontinuation, was much more receptive to her GP’s advice the second time around,  
24  
25 because she was afraid of relapsing again (see Box 1). On the other hand, where people were confident  
26  
27 that they had learned the skills to self-manage their depression without ADMs, they more often reported  
28  
29 that they could manage the process independently, and placed less value on their GP’s advice: *“I went*  
30  
31 *along to the doctors because I was polite to ask him if I could stop taking it. And he said, “Well yeah*  
32  
33 *maybe in a few months time you can taper it- ease it off a bit.” But really I had decided (laughs) I was*  
34  
35 *going to stop. So I was just there out of politeness.” (1203; Interview, Discontinued).*  
36  
37  
38  
39

#### 40 **Timing**

41

42  
43 This over-arching theme focuses on participants’ reflections on their current sense of  
44  
45 vulnerability to depressive relapse and recurrence, which appeared to relate to their external  
46  
47 circumstances and current level of depression symptoms. It also describes how this sense of  
48  
49 vulnerability influenced their subsequent decisions around ADM tapering and discontinuation.  
50  
51 Participants’ reflected on what they thought would be the most appropriate timing and sequencing of  
52  
53 ADMs and psychological therapy in relation to each other, to support the long-term treatment of  
54  
55 depression. This theme comprises two sub-themes.  
56  
57

#### 58 Feeling vulnerable

59  
60

## DISCONTINUING ANTIDEPRESSANT MEDICATION

Participants discussed the timing of ADM tapering, and thought it was important to wait for the right time to begin tapering. Those who were experiencing depression symptoms, or whose life circumstances were difficult, often made the choice to remain on antidepressants, so not to “*rock the boat*” (1087, Feedback booklet, Tapered but never discontinued). For instance, Annie began to taper off her ADMs, but then experienced some very upsetting life events, so decided to resume ADMs because she felt more vulnerable to depressive relapse (see Box 1). In these cases, many people viewed the mindfulness practices as a helpful addition to ADMs, and some tapered their dosage even if they did not fully discontinue. On the other hand, other participants who felt depressed said that this interfered with their ability to practice the techniques taught or taper ADMs at all: “*When I was feeling really, really down I couldn’t even access those things [the MBCT-TS practices]. It either felt indulgent or I couldn’t physically do it.*” (1031, Interview, Never tapered or discontinued). Nonetheless, some people said they valued attending the programme, even though they did not continue to use the techniques: “*I think that course it’s completely changed my life. [...] Even though I don’t sort of practice mindfulness daily just remembering the course [...] it seems to have helped to keep me more level.*” (2123, Interview, Tapered but never discontinued), and some expressed hope that they would discontinue ADMs in the future, as a result of the programme: “*One day I may stop my medication because it feels the right time to do so, having a more regular mindfulness routine will be in place by then for support. I’m really hopeful and positive about my future!*” (1087, Feedback booklet, Tapered but never discontinued).

## Sequencing of treatments

Reflecting on the right time to engage with different treatments, many participants felt that ADMs were helpful when they first became depressed: “*they got me out of my initial depression so that I could cope more with just everyday life*” (4007, Interview, Never tapered or discontinued). However, many did not envisage being on ADMs indefinitely, and they described an increasing need for insight and self-management of depression as time went on. They thought that the MBCT-TS techniques required more effort, but supported a longer-term vision of recovery, to “*recognise what makes you depressed and to give you a way to cope with your depression throughout your life for the long-term,*



## DISCONTINUING ANTIDEPRESSANT MEDICATION

1  
2  
3 *and a way that you can come off [ADMs].” (4007, Interview, Never reduced or discontinued). As*  
4  
5 illustrated by this quotation, some participants viewed the MBCT-TS skills as part of a longer-term  
6  
7 solution to ADM discontinuation, which extended beyond the two-year follow-up period. Some  
8  
9 participants reflected on how they thought the two treatments could be used in combination to support  
10  
11 people at different parts of their journey, from depression through to recovery: *“I think you need that*  
12  
13 *initial boost of antidepressant to perhaps get you back into a more rational level, and then once you’ve*  
14  
15 *reached that, then bring in the MBCT, until you get back then you know, be weaned off. I can see that*  
16  
17 *working very well really.” (1108, Interview, Never reduced or discontinued).*  
18  
19

## DISCUSSION

**Statement of principal findings**

20  
21  
22  
23  
24  
25  
26  
27 The current study explored the experiences of people with recurrent depression who followed  
28  
29 a programme (MBCT-TS), designed to teach psychological skills to prevent depressive relapse whilst  
30  
31 providing advice to encourage tapering and discontinuation of maintenance ADMs.[14] Qualitative  
32  
33 interviews two years after completing the programme illustrated people’s varying beliefs about  
34  
35 depression and its treatment, and a diversity of concerns, expectations and hopes about ADM  
36  
37 discontinuation. Many participants reported beneficial effects of learning MBCT-TS as an approach to  
38  
39 support relapse prevention, which facilitated tapering or full discontinuation of ADMs. However,  
40  
41 there were also aspects of people’s experiences that contributed to their decisions about whether to  
42  
43 remain on ADMs, taper, discontinue, or in some cases discontinue and resume at a later date. The  
44  
45 qualitative analysis identified seven over-arching themes in participants’ accounts of their decisions  
46  
47 relating to ADM (dis)continuation: beliefs about the causes of depression, control, acceptance, quality  
48  
49 of life, tapering process, interactions with GP, and timing (Table 2). These themes help to explain  
50  
51 why some people discontinued, while other people remained on or resumed ADMs across the two-  
52  
53 year trial period. We also identified indicative cases that illustrated the different ways in which these  
54  
55 themes coalesced within individuals to influence their journeys of ADM use across the programme  
56  
57 (Box 1). Together, these findings have the potential to facilitate discussions between clinicians and  
58  
59  
60

## DISCONTINUING ANTIDEPRESSANT MEDICATION

1  
2  
3 patients about the journey of management and recovery from recurrent depression. The findings also  
4  
5 provide an important starting point for more research into which treatments for recurrent depression,  
6  
7 or combination of treatments, work best for whom and when.  
8  
9

**Strengths and weaknesses of the study**

10  
11  
12  
13 This study had a number of methodological strengths including the relatively large sample for  
14  
15 a study of this nature, and the sampling approach that captured a range of perspectives. In addition,  
16  
17 because participants were followed over two years, the study enabled us to develop an understanding  
18  
19 not just of experiences of MBCT-TS itself, but also its impact on participants' use of ADMs in the  
20  
21 subsequent two years. To overcome difficulties with recollection we supported interviewees with  
22  
23 prompts about the course of their depression and ADM use over the two-year period based on  
24  
25 information they had provided to the study immediately after MBCT-TS and during the trial follow-  
26  
27 ups. Finally, MBCT-TS is a programme based on a cognitive-behavioural model of depression.  
28  
29 Therefore, it is likely that people's experiences of tapering and discontinuing ADMs in the context of  
30  
31 MBCT-TS would have many similarities with people in CBT, another widely used approach to  
32  
33 preventing depressive relapse and recurrence.[24] Nonetheless, the commonalities and particularities  
34  
35 of different psychological therapies remain a topic for further research.  
36  
37  
38  
39

40 Alongside these strengths, it is important to consider the context within which the study took  
41  
42 place and its implications for interpretation of the findings. First, the trial was pragmatic in that it  
43  
44 recruited participants from primary care who had a history of recurrent depression, were on a  
45  
46 maintenance dose of ADMs, and were interested in considering a psychological approach to ADMs for  
47  
48 relapse/recurrence prevention.[17] However, it did not include people either unwilling to consider a  
49  
50 psychological therapy or unwilling to consider tapering/discontinuing their medication. Second, the  
51  
52 parent trial included monitoring participants' use of ADM, and if people following MBCT-TS were not  
53  
54 tapering/discontinuing they were invited to discuss this with their GPs. Some participants reported  
55  
56 feeling pressured to discontinue and it is reasonable to assume that some participants may have made  
57  
58 different decisions in a more naturalistic setting. Third, we sought accounts only from people who  
59  
60

## DISCONTINUING ANTIDEPRESSANT MEDICATION

1  
2  
3 attended at least four sessions of MBCT-TS. Whilst this enabled us to capture the perspectives of people  
4  
5 who had developed some understanding of what MBCT-TS could offer, it also means that the voices  
6  
7 of those who did not engage with the treatment at all were not included.  
8  
9

10 **Strengths and weaknesses in relation to other studies, discussing important differences in**  
11  
12 **results**  
13

14  
15 The majority of previous qualitative work has focussed broadly on people's experiences of  
16  
17 ADM use and discontinuation.[6,11] The present study adds to the body of literature suggesting that  
18  
19 people with a history of recurrent depression may wish to discontinue their maintenance ADMs but  
20  
21 experience a number of practical and psychological barriers to achieving this, such as concerns about  
22  
23 withdrawal effects, fear of relapse, perceived lack of alternative coping strategies, and inadequate  
24  
25 information about discontinuation. Several randomised controlled trials have demonstrated that  
26  
27 psychological therapies such as CBT and MBCT could support ADM discontinuation,[8-10] but to our  
28  
29 knowledge, no qualitative studies have examined people's experiences of this process. Our findings  
30  
31 support the idea that psychological therapy can help to address many of the barriers and provide  
32  
33 facilitators to tapering/discontinuation of ADMs identified in the previous literature.[6] For instance,  
34  
35 participants reported that MBCT-TS helped them by teaching new skills to manage depressive  
36  
37 symptoms, gaining new perspectives drawn from both the psychological model and peer-to-peer  
38  
39 learning, and developing an increased sense of agency concerning ADM discontinuation. We also found  
40  
41 that engaging in psychological therapy supported learning attitudes towards self-care that were  
42  
43 participatory and empowering, which facilitated ADM discontinuation through increasing people's  
44  
45 motivation to engage in psychological tools as an alternative to taking ADMs. People also emphasised  
46  
47 the importance of providing clear, simple information about the process of discontinuation and having  
48  
49 a GP to provide support during discontinuation attempts that is collaborative, individualised and  
50  
51 empowering, with careful monitoring over time.  
52  
53  
54  
55

56  
57 Kendrick has argued that many people remain on ADMs without clinical need and could benefit  
58  
59 from support and guidance on how to discontinue, especially regarding how to deal with initial  
60

## DISCONTINUING ANTIDEPRESSANT MEDICATION

1  
2  
3 withdrawal symptoms.[25] Our findings support this, for example suggesting that psychological therapy  
4 can enable people to better differentiate physical and mental symptoms related to withdrawal from those  
5 related to depressive relapse. However, they also suggest that for people with a history of recurrent  
6 depression, simple tapering support alone may not be enough. Participants spoke of the importance of  
7 feeling that they had acquired alternative skills to manage their depressive symptoms that could take  
8 the place of ADMs, rather than simply skills to manage the tapering process itself. For these participants,  
9 there was an ongoing sense of clinical need. Further, where life circumstances were challenging some  
10 people felt that the time was not right for them to discontinue ADMs and they made an informed  
11 decision to continue with their medication. Even so, the majority of participants who remained on  
12 ADMs reported that the MBCT-TS treatment had increased their quality of life on ADMs, and improved  
13 their confidence in future discontinuation when circumstances were more favourable. Our analysis also  
14 outlines participants' views on the appropriate timing of different treatments, which could give  
15 clinicians a sense of when it might be an appropriate time to initiate conversations about ADM tapering  
16 and discontinuation, and when it might be helpful to refer a patient for psychological therapy.

17  
18  
19  
20  
21  
22  
23  
24  
25  
26  
27  
28  
29  
30  
31  
32  
33  
34  
35  
36  
37  
38  
39  
40  
41  
42  
43  
44  
45  
46  
47  
48  
49  
50  
51  
52  
53  
54  
55  
56  
57  
58  
59  
60  
People's expectations at the outset of the psychological treatment appeared to influence their  
engagement and subsequent outcomes. Although it is widely assumed that positive expectations predict  
greater benefit in psychological therapy, in our sample both unrealistically positive expectations (e.g.  
expecting MBCT-TS to be an "*all-encompassing cure-all*") and very negative expectations (having  
*"no intellectual confidence in the process"*) appeared to act as a barrier to engagement. These findings  
are consistent with those of Malpass et al.[26] and suggest that openly discussing expectations as part  
of the psychological therapy referral or orientation process is likely to be key in preventing  
disappointment or disengagement from what is an effortful process of change. Likewise, in line with  
Maund et al.'s findings,[6] people's causal models of depression also appeared to influence their  
expectations and engagement with psychological therapy. Moreover, they were subject to change during  
and beyond the therapy process, as their experiences either confirmed or disconfirmed their expectations  
and working model of depression and its treatment. People who suffer from depression frequently  
endorse biomedical explanations,[27] and this was evident in our sample. A number of people reported

## DISCONTINUING ANTIDEPRESSANT MEDICATION

1  
2  
3 that they derived these models from discussions with their GPs as a rationale for taking ADMs. Previous  
4  
5 research suggests that conceiving depression as a biomedical illness can absolve people of personal  
6  
7 responsibility and thus challenge stereotypes of depression resulting from personal weakness.[11]  
8  
9 However, our findings suggest that strongly held biomedical beliefs appeared to increase feelings of  
10  
11 dependency on ADMs, and contribute to negative expectations and lack of engagement with  
12  
13 psychological therapy. On the other hand, while learning a psychological model of depression  
14  
15 empowered people towards more self-management of depression and feelings of mastery over their  
16  
17 emotional wellbeing, in some cases, when people developed a psychological understanding and then  
18  
19 went on to relapse, they blamed themselves. In some cases, practical life circumstances also made it  
20  
21 very difficult for people to engage in an approach that required time and effort. Together, this suggests  
22  
23 that polarised beliefs about the causes of depression can either compromise self-efficacy or promote  
24  
25 self-blame. Many participants found it helpful to bridge biomedical and psychological theories, with  
26  
27 parallels to a 'biopsychosocial' framework,[28] rather than viewing separate theories as competing,  
28  
29 which seemed to foster more flexibility, self-compassion and open-mindedness towards trying different  
30  
31 treatment options at different times in their journey of managing recurrent depression. This highlights  
32  
33 the importance of recognising that a myriad of factors, including genetic vulnerability and challenging  
34  
35 social circumstances can influence depression.  
36  
37  
38  
39

40 The present study also built on existing work highlighting the idiosyncratic ways that ADMs  
41  
42 pharmacologically affect the mind and body through sedation, numbing, and activation,[29] and went  
43  
44 further by highlighting how these effects influence people's decisions in the process of discontinuation.  
45  
46 For example, in the instance of numbing, some people viewed this as helpful as it reduced their feelings  
47  
48 of depression, whereas other people said that ADMs numbed all of their emotions, including positive  
49  
50 feelings, and this contributed towards a desire to discontinue them. These findings add to ongoing  
51  
52 discussion about the psychoactive effects of ADMs, including their potential benefits and costs, how  
53  
54 these effects impact people's experience of recovery from depression, and how participating in  
55  
56 psychological therapy can interact with these experiences.  
57  
58  
59  
60

## DISCONTINUING ANTIDEPRESSANT MEDICATION

1  
2  
3 Finally, descriptions of the role of the GP in supporting ADM discontinuation varied markedly,  
4 and this appeared to result both from differences between patients in their preferred level of guidance  
5 and support, and the availability of their GPs to provide this. For example, some people adhered to their  
6 GP's advice although this was in conflict with their own desired approach, some described informing  
7 their GP of their intentions as an act of courtesy, and some did not involve their GP at all. In some of  
8 these latter cases, participants felt that they would have benefited from more support, but their GP, for  
9 a range of reasons, was unable to provide this. People also described needing more understanding and  
10 support over time as they took more responsibility for managing their depression. This is in line with  
11 findings from Malpass et al.,[11] who suggested that people vary in the extent to which they want to be  
12 involved in treatment decision-making, and their preferences for involvement are dynamic, not static.  
13 Archer has described different 'modes of reflexivity' noting the varying degrees to which people act  
14 autonomously or rely on endorsement from others.[30] It is likely that when GPs are able to recognise  
15 their patients' preferred mode of engagement and adapt their approach accordingly, discontinuation  
16 attempts will be more successful.  
17  
18  
19  
20  
21  
22  
23  
24  
25  
26  
27  
28  
29  
30  
31  
32

**Meaning of the study: possible explanations and implications for clinicians and policymakers**

33  
34  
35  
36  
37 People with a history of recurrent depression may wish to taper and discontinue maintenance  
38 ADMs, but lack the knowledge and confidence to do so. Furthermore, people benefit from having social  
39 support during discontinuation attempts, but do not always get the level of support they require from  
40 their GPs or existing social networks. This highlights the potential clinical value in providing group-  
41 based psychological interventions that support ADM discontinuation. Importantly, both the results of  
42 the thematic analysis and the narratives of individual participants suggest that the benefits of  
43 psychological therapy to assist ADM tapering/discontinuation are not fully captured by rates of  
44 complete discontinuation or relapse rates of depression alone. Rather, recovery meant different things  
45 to different people, and overall, the outcome most important to patients appeared to be their day-to-day  
46 functioning and quality of life. Within the broader context of people's lives, psychological therapy may  
47 increase quality of life, *whether or not* the person successfully discontinues their ADMs or experiences  
48 further depressive symptoms. Therefore, many people on ADMs could benefit from concurrent  
49  
50  
51  
52  
53  
54  
55  
56  
57  
58  
59  
60

## DISCONTINUING ANTIDEPRESSANT MEDICATION

1  
2  
3 psychological therapy even if they do not wish to taper/discontinue, to promote positive emotional  
4 states, better management of residual symptoms, to resolve feelings of shame surrounding depression  
5 and ADM use, increase personal agency, and to provide people with a broader perspective on their  
6 depression.  
7  
8  
9  
10

11  
12 Whilst some people described the substitution of the support of ADMs with psychological  
13 techniques as a relatively straightforward and positive process, for others there was an understanding  
14 of the ongoing benefits of ADMs, alone or in combination with psychological therapy. The study also  
15 highlighted the importance of optimal timing and sequencing of pharmacological and psychological  
16 treatments, and the relative benefits of each treatment at different periods. Therefore, it is crucial that  
17 GPs are receptive to their patients' fluctuating preferences and circumstances, support a broad model  
18 of the causes of depression, and encourage them to try different approaches that could facilitate a  
19 journey towards recovery. Individual narrative accounts can provide valuable insights into optimal  
20 ways to augment ADM treatment or support ADM discontinuation with psychological therapy, and  
21 how facilitators and barriers to tapering and discontinuing may interact dynamically within  
22 individuals' experiences (Box 1).  
23  
24  
25  
26  
27  
28  
29  
30  
31  
32  
33  
34  
35  
36

### 37 **Unanswered questions and future research**

38  
39 This work adds to the emerging literature on people's experiences of ADM discontinuation. A  
40 next step is to consider whether the same themes emerge in the accounts of people undertaking  
41 therapy-supported ADM discontinuation in more naturalistic settings, rather than in the context of a  
42 clinical trial, and when using psychological therapies other than MBCT-TS. Additionally, Maund et  
43 al. point out that psychological programmes such as MBCT and CBT are relatively resource-  
44 intensive.[9] The current study enrolled participants with a history of highly recurrent depression (3 or  
45 more episodes). Therapy-supported ADM discontinuation may be most appropriate for those people  
46 who are vulnerable to depressive relapse and recurrence, and require the substitution of ADMs with  
47 alternative coping skills, whereas others could benefit from simple advice on how to taper ADMs.  
48 Likewise, the actual process of ADM tapering, and the typical withdrawal symptoms experienced, are  
49  
50  
51  
52  
53  
54  
55  
56  
57  
58  
59  
60

## DISCONTINUING ANTIDEPRESSANT MEDICATION

1  
2  
3 both likely to differ according to the type of medication a person is prescribed and the duration of  
4  
5 their use. Future research should explore from whom simple tapering advice is enough, and who  
6  
7 requires the more intensive support of a programme such as MBCT-TS. In addition, while MBCT-TS  
8  
9 may have similarities to other cognitive-behavioural therapies, the commonalities and particularities  
10  
11 of people's experiences of tapering and discontinuing ADMs in the context of different psychological  
12  
13 therapies is an important focus for future research.  
14

15  
16  
17 Our findings suggest that people's causal beliefs about depression had an important influence  
18  
19 on their responses to therapy-supported discontinuation, but did not examine how people form these  
20  
21 beliefs (e.g. the role of the GP, other health professionals, the media, internet). Most consultations about  
22  
23 depression will occur in the time-pressured context of primary care. Future work considering how health  
24  
25 professionals can most effectively communicate with their patients about the complex aetiology of  
26  
27 depression, and understand the how this affects treatment decisions, compliance and outcomes would  
28  
29 be valuable. Such communication needs to take into account both short-term goals, both for the clinician  
30  
31 and patient (e.g., the clinician's desire to convince a patient in crisis to use ADM), and also the longer-  
32  
33 term impact of particular causal models in supporting patients' self-acceptance, agency and recovery.  
34

35  
36  
37 This work took a qualitative approach in order to understand the breadth of participants'  
38  
39 perspectives on their use of MBCT-TS to support ADM tapering, and the range of factors that  
40  
41 contributed to the different possible journeys to recovery in the years that followed. To explore  
42  
43 whether these factors are significant causal determinants of discontinuation journeys requires further  
44  
45 research. Such research could take the factors identified here and test whether they significantly  
46  
47 predict ADM tapering/discontinuation in a prospective study. Finally, this research suggests that  
48  
49 tapering/discontinuation is not a separate or isolated variable. Participants' accounts clearly  
50  
51 demonstrate that the benefits of psychological approaches to support ADM discontinuation and the  
52  
53 prevention of depressive relapse cannot be measured by rates of relapse or discontinuation alone.  
54  
55 Such research should prioritise the outcome that is most meaningful to patients: their day-to-day  
56  
57 functioning and quality of life.  
58  
59  
60



## DISCONTINUING ANTIDEPRESSANT MEDICATION

## REFERENCES

1. Kessler R C & Bromet E J. The Epidemiology of Depression Across Cultures. *The Annual Review of Public Health*. 2013;34:119–38. <https://doi.org/10.1146/annurev-publhealth-031912-114409>
2. World Health Organisation. *Depression and other common mental disorders: Global health estimates*. Geneva: WHO Document Production Services; 2015. <https://apps.who.int/iris/bitstream/handle/10665/254610/WHO-MSD-MER-2017.2-eng.pdf> (accessed 18 May 2019).
3. Kruijshaar M E, Barendregt J, Vos T, et al. Lifetime prevalence estimates of major depression: An indirect estimation method and a quantification of recall bias. *Eur J Epidemiol*. 2005;20(1):103–111. <https://doi.org/10.1007/s10654-004-1009-0>
4. National Institute of Health and Care Excellence (NICE). *Depression: The treatment and management of depression in adults (update)*. London: Author; 2009. <https://www.nice.org.uk/guidance/cg90> (accessed 18 May 2019).
5. Moore M, Yuen H, Dunn N, et al. Explaining the rise in antidepressant prescribing: a descriptive study using the general practice research database. *BMJ*. 2009;339(oct15 2):b3999-b3999. <https://doi.org/10.1136/bmj.b3999>
6. Maund E, Dewar-Haggarta R, Williams S, et al. Barriers and facilitators to discontinuing antidepressant use: A systematic review and thematic synthesis. *Journal of Affective Disorders*. 2019;245:38-62. <https://doi.org/10.1016/j.jad.2018.10.107>
7. Bowers H, Williams S, Geraghty A, et al. Helping people discontinue long-term antidepressants: views of health professionals in UK primary care. *BMJ Open*. 2019;9(7):e027837. <http://dx.doi.org/10.1136/bmjopen-2018-027837>
8. Kuyken W, Warren F C, Taylor R S, et al. Efficacy of mindfulness-based cognitive therapy in prevention of depressive relapse: An individual patient data meta-analysis from randomized trials. *JAMA Psychiatry*. 2016;73(6):565–574. <https://doi.org/10.1001/jamapsychiatry.2016.0076>
9. Maund E, Stuart B, Moore M, et al. Managing antidepressant discontinuation: a systematic review. *Ann Fam Med*. 2019;17:52-60. <https://doi.org/10.1370/afm.2336>
10. Bockting C, Klein N, Elgersma H, et al. Effectiveness of preventive cognitive therapy while tapering antidepressants versus maintenance antidepressant treatment versus their combination in prevention of depressive relapse or recurrence (DRD study): a three-group, multicentre, randomised controlled trial. *Lancet Psychiatry*. 2018;5(5):401-410. [https://doi.org/10.1016/S2215-0366\(18\)30100-7](https://doi.org/10.1016/S2215-0366(18)30100-7)
11. Malpass A, Shawa A, Sharp D, et al. “Medication career” or “Moral career”? The two sides of managing antidepressants: A meta-ethnography of patients’ experience of antidepressants. *Social Science and Medicine*. 2009;68:154-168. <https://doi.org/10.1016/j.socscimed.2008.09.068>
12. Bayliss P & Holttum S. Experiences of antidepressant medication and cognitive-behavioural therapy for depression: a grounded theory study. *Psychology and Psychotherapy: Theory, Research and Practice*. 2015;88:317–334. <https://doi.org/10.1111/papt.12040>
13. Weaver A. *Journeys through depression: patients' experiences of transformational change through mindfulness based cognitive therapy (MBCT) and anti-depressant medication (ADM)*. University of Exeter; 2015. <https://ore.exeter.ac.uk/repository/bitstream/handle/10871/18309/WeaverA.pdf?sequence=1&isAllowed=y> (accessed 18 May 2019).
14. Kuyken W, Hayes R, Barrett B, et al. Effectiveness and cost-effectiveness of mindfulness-based cognitive therapy compared with maintenance antidepressant treatment in the prevention of depressive relapse or recurrence (PREVENT): A randomised controlled trial. *Lancet*. 2015;386(9988):63–73. [https://doi.org/10.1016/S0140-6736\(14\)62222-4](https://doi.org/10.1016/S0140-6736(14)62222-4)

## DISCONTINUING ANTIDEPRESSANT MEDICATION

15. Kuyken W, Byford S, Byng R, et al. Study protocol for a randomised controlled trial comparing mindfulness-based cognitive therapy with maintenance anti-depressant treatment in the prevention of depressive relapse/recurrence: the PREVENT trial. *Trials*. 2010;11(99):1-10. <https://doi.org/10.1186/1745-6215-11-99>
16. Kuyken W, Byford S, Byng R, et al. Update to the study protocol for a randomized controlled trial comparing mindfulness-based cognitive therapy with maintenance anti-depressant treatment depressive relapse/recurrence: the PREVENT trial. *Trials*. 2014;15(1). <https://doi.org/10.1186/1745-6215-15-217>
17. Kuyken W, Hayes R, Barrett B, et al. The effectiveness and cost-effectiveness of mindfulness-based cognitive therapy compared with maintenance antidepressant treatment in the prevention of depressive relapse/recurrence: results of a randomised controlled trial (the PREVENT study). *Health Technol Assess*. 2015;19(73):1-124. <https://doi.org/10.3310/hta19730>
18. Braun V & Clarke V. Using thematic analysis in psychology. *Qual Res Psychol*. 2006;3(2):77-101. <http://dx.doi.org/10.1191/1478088706qp063oa>
19. American Psychiatric Association. *Diagnostic and statistical manual of mental disorders* (4th ed., text rev.). Washington, DC: Author; 2000.
20. Segal Z V, Williams J M G, & Teasdale J D. *Mindfulness- based cognitive therapy for depression: A new approach to preventing relapse*. New York: Guilford Press; 2002.
21. Allen M, Bromley A, Kuyken W, et al. Participants' experiences of mindfulness-based cognitive therapy: "It changed me in just about every way possible". *Behav Cogn Psychother*. 2009;37:413-430. <https://doi.org/10.1017/S135246580999004X>
22. Ridge D, Kokanovic R, Broom A, et al. My dirty little secret: Patient constructions of anti-depressant use and the crisis of legitimacy. *Social Science and Medicine*. 2015;146:53-61. <http://dx.doi.org/10.1016/j.socscimed.2015.10.012> 0277-9536
23. Tickell A. Patient experiences of discontinuing antidepressant medication with the support of mindfulness-based cognitive therapy. Presented at the International Conference on Mindfulness; 2018; Amsterdam.
24. Farb N, Anderson A, Ravindran A, et al. Prevention of relapse/recurrence in major depressive disorder with either mindfulness-based cognitive therapy or cognitive therapy. *J Consul Clin Psychol*. 2018;86(2):200-204. <http://dx.doi.org/10.1037/ccp0000266>
25. Kendrick, A. Reviewing long-term anti-depressant use by careful monitoring in everyday practice (REDUCE) programme. 2016 <https://europepmc.org/grantfinder/grantdetails?query=pi:%22Kendrick+A%22+gid:%22RP-PG-1214-20004%22+ga:%22DH/NIHR%22> (accessed 18 May 2019).
26. Malpass A, Carel H, Ridd M, et al. Transforming the perceptual situation: a meta-ethnography of qualitative work reporting patients' experiences of mindfulness-based approaches. *Mindfulness*. 2012;3:60-75. <https://doi.org/10.1007/s12671-011-0081-2>
27. Kuyken W, Brewin C R, Power M J, et al. Causal beliefs about depression in depressed patients, clinical psychologists and lay persons. *Br J Med Psychol*. 1992;65:257-268. <https://doi.org/10.1111/j.2044-8341.1992.tb01706.x>
28. Engel G. The need for a new medical model: A challenge for biomedical science. *Science*. 1977;196(4286):126-9. Retrieved from: <https://www.jstor.org/stable/1743658>
29. Moncrieff J, Cohen D, & Porter S. The Psychoactive Effects of Psychiatric Medication: The Elephant in the Room. *J Psychoactive Drugs*. 2013;45(5):409-415. <http://doi.org/10.1080/02791072.2013.845328>
30. Archer M. S. Routine, reflexivity, and realism. *Sociol Theory*. 2010;28(3):272-303. <https://doi.org/10.1111/j.1467-9558.2010.01375.x>

## DISCONTINUING ANTIDEPRESSANT MEDICATION

**BOX 1: CASE EXAMPLES**

**Mandy.** *Mandy, aged 57, had experienced nine episodes of depression, beginning when she was 32. Following the MBCT-TS course Mandy successfully discontinued her ADM treatment. She did not experience a relapse over the 24-month follow-up period.*

Before the trial, Mandy felt that ADMs helped her to function well. In the past, she had tried tapering, but had always relapsed, so assumed that ADMs would be a part of her life forever. At first, Mandy was nervous, but was willing to try tapering ADMs gradually and with the support of MBCT-TS (**Control: Managing Expectations**). Mandy's GP was supportive, but reassured her that it was ultimately her decision (**Interactions with GP: Presence and Support**). During the MBCT-TS course, Mandy said that she learned a different model of depression and developed a better understanding of "how the mind works" (**Beliefs about the Causes of Depression: Learning a New Model**). She felt more confident about tapering, and said that this time it was "so easy, knowing that I have been given tools to help me through it if needed", and found the course "totally liberating" as it gave her the chance to take control of her depression, rather than the other way round (**Control: Agency and Responsibility**). She also found it helpful to learn about the possible symptoms of withdrawal, which included mood swings. Mandy realised that the relapses she had experienced when she had tried to taper her ADMs in the past might have been withdrawal symptoms, as opposed to "real relapses" (**Tapering Process: Managing Withdrawal Effects**). At the time of interview, having discontinued ADMs, Mandy still practised what she learned in MBCT-TS and made it part of her daily routine. She accepted that if she ever relapsed, she could use ADMs, but it would only ever be a short-term solution, because she has the MBCT-TS skills as a "weapon" to help her manage (**Acceptance: Self-Care**).

**Greta.** *Greta, aged 72, had experienced three episodes of depression, beginning when she was 33. Following the MBCT-TS course she discontinued her ADMs but then resumed following a deterioration in mood.*

## DISCONTINUING ANTIDEPRESSANT MEDICATION

1  
2  
3 Greta was very optimistic about the course because she hated being on ADMs, which gave her  
4 unpleasant side effects that interfered with her quality of life (**Control: Managing Expectations**). At  
5 first, Greta said the course made an “*immense difference*” to her, and she described learning how to  
6 combat the negative thoughts and feelings she was having (**Beliefs about the Causes of Depression:**  
7 **Learning a New Model**). The programme left Greta feeling “*so well and positive*” that she decided to  
8 taper her ADMs very quickly (**Tapering Process: Pace of Reduction**), but began to feel her mood  
9 dipping. Greta thought this must be a sign that the programme was not working, because she should not  
10 feel depressed (**Acceptance: Perspectives on Relapse**). Greta went to her GP, who did not seem  
11 interested in the programme and told her to resume ADMs immediately (**Interactions with GP:**  
12 **Presence and Support**). She was disappointed and felt “*guilty*” that she was not able to use these new  
13 skills to keep herself well (**Control: Agency and Responsibility**). She stopped practising mindfulness,  
14 although the programme made her remember to appreciate the high points in her day and experience  
15 more joy (**Quality of Life: From Coping to Enjoying Life**).

16  
17  
18 **Annie.** *Annie, aged 48, had experienced five episodes of depression, beginning when she was 23.*  
19 *Following the MBCT-TS programme, she discontinued her ADMs but then resumed them later.*

20  
21  
22  
23  
24  
25  
26  
27  
28  
29  
30  
31  
32  
33  
34  
35  
36  
37  
38  
39  
40  
41  
42  
43  
44  
45  
46  
47  
48  
49  
50  
51  
52  
53  
54  
55  
56  
57  
58  
59  
60  
Annie felt that ADMs had a positive impact on her life, allowing her to cope day-to-day as a full-time  
carer for her husband who had a disability. At first, she was very reluctant to try discontinuing ADMs  
because she believed she might have low levels of serotonin (**Beliefs about the Causes of Depression:**  
**Neurochemical Disruption**). However, the programme taught her a new model of understanding  
depression (**Beliefs about the Causes of Depression: Learning a New Model**), which made her feel  
empowered to practice the psychological techniques (**Control: Agency and Responsibility**). She  
started to taper off ADMs, but then her mother died and her husband’s health deteriorated, so it was  
difficult to find time to practice. Her GP advised her it was probably not a good time to discontinue  
(**Interactions with GP: Presence and Support**), so she resumed ADMs (**Timing: Feeling**  
**Vulnerable**). However, Annie still incorporated the mindfulness exercises into her everyday life, which  
brought her more joy (**Quality of Life: Experiencing Emotions More Fully**). She also recognised that  
it is not her fault when she felt depressed, given how challenging her life was (**Acceptance: Resolving**

## DISCONTINUING ANTIDEPRESSANT MEDICATION

1  
2  
3 **Shame and Denial).** Annie felt that the best way to manage her depression was to combine ADMs with  
4 mindfulness practices, which gave her more skills to look after herself during difficult times  
5  
6  
7 **(Acceptance: Self-Care).** She felt hopeful that one day she would discontinue ADMs, when her life  
8  
9  
10 circumstances were more stable **(Timing: Feeling Vulnerable).**

11  
12 **George.** *George, aged 37, had experienced ten episodes of depression, beginning when he was 16.*  
13  
14 *Following the MBCT-TS programme he discontinued his ADMs. He experienced a relapse to*  
15  
16 *depression during the 24-month follow-up.*

17  
18  
19 George was very optimistic about trying an alternative to ADMs, because they made him feel like a  
20  
21 “zombie”. Having experienced substance misuse issues in the past George had the goal of being totally  
22  
23 “chemical free” **(Control: Managing Expectations).** Before the course, George felt he had no control  
24  
25 over his depression symptoms, and his mood would deteriorate suddenly without warning. Through  
26  
27 practising the mindfulness skills, he described developing more awareness of his emotions and felt he  
28  
29 would have the skills to manage them **(Control: Agency and Responsibility).** George said that the best  
30  
31 part of taking part in MBCT-TS was meeting other people with depression, which made him feel more  
32  
33 accepting of himself **(Acceptance: Resolving Shame and Denial).** He felt that ADMs had masked his  
34  
35 symptoms, whereas MBCT-TS allowed him to explore the problems in his life that were contributing  
36  
37 to depression and work through them to make long-term changes **(Control: Agency and**  
38  
39 **Responsibility).** When George relapsed shortly after discontinuing ADMs, he carried on practising  
40  
41 MBCT-TS and said that the skills he learned were enough to pull him out of that period of low mood  
42  
43 **(Acceptance: Perspectives on Relapse).**

44  
45  
46  
47 **Claire.** *Claire, aged 49, had experienced four episodes of depression, beginning when she was 17.*  
48  
49 *Following the MBCT-TS programme, Claire discontinued her ADMs. She relapsed and resumed*  
50  
51 *medication, but subsequently tapered and discontinued again, and was not using ADMs at the time of*  
52  
53 *her follow-up interview.*

54  
55  
56  
57 At first, Claire was very sceptical about the MBCT-TS programme and thought it might all be “mumbo  
58  
59 jumbo”. However, she was very keen to come off ADMs, so she approached the programme with an  
60

## DISCONTINUING ANTIDEPRESSANT MEDICATION

1  
2  
3 open mind and wanted to give it her all (**Control: Managing Expectations**). As the course progressed,  
4  
5 Claire changed her mind and began to “*believe more and more that this might help me*”. MBCT-TS  
6  
7 gave her new ways to cope with her feelings, which shocked her because she “*had never took control*  
8  
9 *of my depression before*” (**Control: Agency and Responsibility**). She became very excited and tapered  
10  
11 off her medication “*too quickly*” and “*hit a brick wall in a short amount of time. Went straight back in*  
12  
13 *to a deep depression*” (**Tapering Process: Pace of Reduction**). Her doctor was very understanding,  
14  
15 and did not push her to do anything, but advised her to go back on ADMs and try to taper off again  
16  
17 when she was feeling better (**Interactions with GP: Presence and Support**). He said that she should  
18  
19 try tapering them more slowly next time even though she “*wanted to get off them as soon as possible*”.  
20  
21 This time, she did “*exactly as she was told*” and did not experience a relapse (**Interactions with GP:**  
22  
23 **Following Advice**). Claire was very pleased because she said they had always felt that ADMs had  
24  
25 “*suppressed*” her and that the person she was when taking ADMs “*wasn't really me*” (**Quality of Life:**  
26  
27 **Experiencing Emotions More Fully**).  
28  
29  
30  
31  
32  
33  
34  
35  
36  
37  
38  
39  
40  
41  
42  
43  
44  
45  
46  
47  
48  
49  
50  
51  
52  
53  
54  
55  
56  
57  
58  
59  
60

## DISCONTINUING ANTIDEPRESSANT MEDICATION

**BOX 2****WHAT IS ALREADY KNOWN ON THIS TOPIC**

Many people with a history of depression want to come off their maintenance ADMs but find this challenging, partly due to fears of depressive relapse/recurrence.

Evidence suggests that MBCT may support people to taper and discontinue maintenance ADMs without increasing risk of relapse or recurrence.

However, very little research has examined people's experiences of contemplating, commencing, and completing psychological therapy-supported ADM discontinuation.

**WHAT THIS STUDY ADDS**

This qualitative study explored how MBCT supported people with a history of recurrent depression to embark upon tapering and discontinuation of their ADMs.

Our findings indicate that people acquired skills to manage their depressive symptoms that could take the place of ADMs, as well as skills to manage the tapering process itself. Participants described this as an effortful process, requiring stable life circumstances, adequate support from medical professionals, and motivation to learn and apply psychological techniques.

Nonetheless, most participants described improvements in quality of life that they attributed to therapy, whether or not they discontinued ADMs, or experienced further relapses/recurrences.

## Statement Concerning Reflexivity

Interviews were conducted by members of the PREVENT trial research team (see Kuyken et al., 2015), following training and using a standard protocol and semi-structured interview schedule. Both male and female interviewers gathered data. Interviewers had knowledge of the participants' treatment journeys prior to conducting their 24-month interviews (from reviewing their files and in some cases as a result of their involvement in earlier waves of data collection). The protocol included interviewers familiarizing themselves with any information about treatment experiences and trajectories of participants, which were held in study records, as part of the interview preparation process. Researchers did not know participants prior to their entry to the trial, and had no association with them outside the context of the trial and associated research assessments.

All/Some interviewers had undertaken mindfulness training, acting as participant observers in MBCT courses, or in other contexts. This personal knowledge enabled them to understand the nuances in participants' descriptions of their experiences, for example participants' references to particular mindfulness practices or exercises, and to respond with confidence. Some interviewers had positive personal experiences of mindfulness whereas others held more neutral attitudes. None were aware of the main trial outcomes at the time the interviews were conducted and all were encouraged to adopt an open minded and curious attitude, with no preconceptions about whether MBCT-TS had, or had not, supported participants in their treatment journeys. Despite this, it should be acknowledged that some interviewers may have held implicit biases or expectations regarding treatment effects. Likewise, participants understood the association of interviewers with the primary trial. Thus whilst participants were encouraged to speak freely and honestly about their experiences, it is possible that their responses were influenced by the perceived allegiance of the researchers to



1  
2  
3 the intervention being explored, and that they may have felt a sense of obligation to make  
4  
5 positive comments about MBCT-TS.  
6

7  
8 The researchers conducting data analysis, AT (BA Hons, Postgraduate Research  
9  
10 Assistant) and CC (DPhil, Senior Research Fellow), although not involved in the PREVENT  
11  
12 trial, had a knowledge of the programme under investigation. AT has undertaken mindfulness  
13  
14 training in other contexts, and is familiar with the MBCT curriculum. CC has significant  
15  
16 prior experience as a participant-observer in MBCT classes for people with recurrent  
17  
18 depression. JR (DPhil, Lecturer) is an experienced qualitative researcher who has theoretical  
19  
20 knowledge of mindfulness-based approaches. AT, CC and JR have all worked previously on  
21  
22 studies exploring mindfulness-based programmes in different contexts and AT and CC were  
23  
24 employed on a research grant exploring the effectiveness of mindfulness-based programmes  
25  
26 at the time this work was conducted. AT, CC, and JR were aware of the main outcomes of the  
27  
28 PREVENT trial (no superiority of MBCT-TS over maintenance antidepressants) at the time  
29  
30 the qualitative analysis commenced, and approached the data with an assumption of overall  
31  
32 equipoise between the two approaches, that was nevertheless likely to concealed marked  
33  
34 individual differences in response. WK (PhD, DClInPsy) was the Principal Investigator on  
35  
36 the PREVENT trial and is a mindfulness trainer and practitioner. He was not involved in  
37  
38 directly teaching mindfulness to any of the participants in the PREVENT trial, but did  
39  
40 supervise the mindfulness teachers who taught the MBCT-TS trial classes. He had no  
41  
42  
43  
44  
45  
46  
47 personal knowledge of the individual participants and their treatment journeys.  
48  
49  
50  
51  
52  
53  
54  
55  
56  
57  
58  
59  
60

## PREVENT: End of Trial Interviews Guidance for Interviewers

### Aims

Researchers will conduct interviews with 42 purposively sampled participants in the MBCT arm of the trial at the end of the trial. The research topic we are targeting here is:  
Participants' experiences during the follow-up period of the PREVENT trial of use of ADMs and MBCT-based techniques in relation to each other, during periods of wellness, depressive relapse, and transitions between these two.

### Interview Preparation

Before conducting any of the interviews researchers read the key qualitative papers (Malpass et al., 2012; Allen et al., 2009). Before each interview researcher to read the participant's file to (re-) familiarise themselves with participant characteristics (e.g., relationship status) and obtain timeline populated with info on borderline or actual relapses and ADM usage. They should also review, and have to hand in the interview, the end of treatment and 24-month feedback booklets to get a sense of the profile of each participant during the follow-up period in terms of the following variables: full or partial attendance of MBCT course; use of mindfulness techniques; use of ADMs; and any significant life events. This will shape the interview in terms of: i) which sub-sections of the interview are relevant; ii) issues for particular participants that may need to be probed in more detail. Make sure you are as clear as possible about which sections of the interview and questions are relevant to your respondent BEFORE YOU START. Where possible, **choose specific/representative/salient episodes or junctures** in timeline for targeted probing using the schedule (possibly match them onto wellness, wobbles, and depressive sections). **Print out two copies of timeline**, one for yourself and one for the interviewee to draw upon.

### Conducting the Interview

The interview is semi-structured. In each section, questions and follow-up questions are suggested. However, researchers should use their judgment in drawing out participants in relation to the research topic. Interviewers ask open-ended questions and follow participants' "leads" while keeping in mind the research question. The aim is to enable participants to give their "story" around the main topics of investigation.

Researchers should be strategic in use of time in the interview to ensure the topic guide/respondent covers material that answers the research questions; especially in Section 1, it is important to keep the interview focused. If the interviewer feels respondents are being unclear or opaque help the respondent unpack what they mean or agree with the participant that the issue is unclear. Interviewers should ensure *that all the interview questions that are relevant to the participants' particular profile are covered*. Consider a temporal order to do the interview allocating/planning pre-set time windows for each consecutive episode/junction so as not to exceed a **maximum of 60 minutes** for the overall interview.

Participants may feel the need to please researchers or give the "right" answers. This is particularly likely around ADM tapering where the trial has consistently communicated that we want participants to taper and discontinue their ADM. It is important that researchers communicate explicitly and non-

1  
2  
3 verbally that there are no right and wrong answers to any of the questions and we want to know  
4 people's experiences in relation to MBCT and ADM.

5 Use of particular terms (e.g., "wobble," "relapse") can be adapted in the light of language used by  
6 participants. Follow-up questions should be asked for clarification and elaboration, *and this should be*  
7 *driven by the research aim for each section of the interview.* As far as possible interviewers should  
8 cover all the suggested topics and questions and behave with the minimum of variation between  
9 interviews. Instructions to interviewers and suggested wordings for introductions to each section are  
10 given in italics below. The key issues for each question are in bold.  
11  
12

### 13 14 **Interview Opening / Introduction**

15  
16 Open the interview with something like:

17  
18  
19 *"Thank you for agreeing to do this interview with me. The interview is about hearing from you how*  
20 *things have been in the trial and checking that we have your story right. It will be collaborative and*  
21 *semi-structured which means I have some topics I'd like to cover, but the questions will be quite open*  
22 *so as to give you, as an expert of your own lived experience, a chance to express your own views and*  
23 *tell me about your experiences and what seems important to you. Everyone will have had different*  
24 *experiences and we are interested in hearing about these from your point of view – both the good and*  
25 *the not-so-good experiences – so that we can learn about and develop our treatments further. Please*  
26 *tell us exactly how you feel!*

27  
28 *Just to let you know that I am un-blinded and know that you have participated in the MBCT group, so*  
29 *it is ok to talk freely about this. I would like to record this interview, and the recording will be*  
30 *transcribed word for word and analysed as part of the research for the PREVENT trial. All*  
31 *identifying information will be removed at this point. Your name will never appear on the*  
32 *transcription or any other documents or files that result from this interview (such as the audio file).*  
33 *Do you have any questions before we begin?"*  
34  
35

### 36 37 **Section 1: Overview of the follow-up period using the timeline**

38  
39 The aim of this section is to obtain a brief overview of how the participant has experienced the  
40 follow-up period in terms of three areas: 1. Periods of wellness and depression; 2. Antidepressant  
41 medication; 3. Life events. Subsequent interview sections follow up on each of these in more detail  
42 and the profile of experiences here can be used to tailor subsequent interview questions. Information  
43 on the first two areas should be available in advance and summarised on the prepared timeline.  
44 Information on life events might be found in the research files and database but will need to be  
45 obtained here. Preparation by thoroughly reading the file, and possibly even some of the audio  
46 recordings, in advance will help a lot here.

47  
48 Use the timeline in whatever way feels most comfortable and guided by the respondent's preference.  
49 The participant can add life events him/herself; or the researcher can do this; or it can simply be used  
50 as a guide. Show the timeline and say something like:

51  
52  
53  
54 *"I'd like to start with a brief overview of how life has been for you in the trial. In preparing for our*  
55 *meeting today, we have put together this timeline. It summarises the information you have given us as*  
56 *part of the research study about any periods of depression or wobbles, and your use of antidepressant*  
57 *medication during the trial. It also includes the date of your most recent episode of depression*  
58 *before taking part in the trial, based upon what you told us during your first assessment. I've also*  
59

1  
2  
3 looked through your comments in the Feedback Booklets you completed one month after the end of  
4 the mindfulness course and again recently. These were very helpful and I'll use some of what you  
5 wrote there to guide what we talk about today."  
6  
7

8 Interview Question

Probes/Examples/Directions

9  
10 **1.1. Do you think the information we have here on the timeline**  
11 **looks about right? Is there anything you would like to change?**

If we know from previous assessments that the person has had a significant life event ensure this is acknowledged here. Mark – or get the respondent to mark – any life events on the time-line / graph.

12  
13  
14  
15  
16  
17  
18 **1.2. Have there been any important events in your life during**  
19 **your time in the trial that have affected you either positively or**  
20 **negatively that we can add to the timeline?**

Keep the discussion focused and brief to allow as much time for later sections as possible.

21  
22 **1.3. Can we check that I have your use of antidepressant**  
23 **medication right these last two years?**

Work through timeline for any tapering/discontinuation, dosage, resumption etc.

24  
25  
26 **1.4. How have things been between the last time we spoke and**  
27 **today?**

Informally extend timeline with relevant depressive episodes/ADM use/life events up until current interview date; Where necessary, establish current symptomatic status (informally) and make sure they are ok to continue.

28  
29  
30  
31  
32  
33  
34  
35 *“The remaining questions in this interview will focus upon your experiences with the aid of this*  
36 *timeline.”*

37  
38  
39 Keep the time-line / graph in view to refer back to / use further in later parts of the interview. Use the  
40 timeline to keep the interview contained with regard to the different episodes/junctures identified prior  
41 to interview. Allow and encourage the participant to use a pen to put down details in their copy of the  
42 timeline.  
43

44  
45 **Section 2: Questions on wellness (for all)**

46  
47 Comment on Section 2-4: Particularly in the wobbles section it is important to go for depth rather than  
48 breadth with regards to potential issues around these time points (e.g. what happened in days before,  
49 relationships, sleep etc.). As a general principle, interviewers should encourage interviewees to focus  
50 on prototypical or most memorable junctures in timeline. In order to keep interview contained, agree  
51 on a timeframe for each episode/juncture and keep questions focused on this.  
52  
53

54  
55 *“I'd like to ask about any times when you were well during the trial – when you weren't feeling low*  
56 *or experiencing an episode of depression”*  
57  
58  
59  
60

| Interview Question                                                                                                                | Probes/Examples/Directions                                                                                                             |
|-----------------------------------------------------------------------------------------------------------------------------------|----------------------------------------------------------------------------------------------------------------------------------------|
| <b>2.1. Has anything from the mindfulness course played a part in staying well during the trial? If so, can you describe how?</b> | Examples: any techniques, ideas; response plan<br>Prompts: How / why / why not?;<br>Therapist/Group/Researcher Role                    |
| <b>2.2 Did your use of antidepressants play a part in staying well during the trial? If so, can you describe how?</b>             | Prompts: How / why / why not? ;<br>GP Role                                                                                             |
| <b>2.3 What about the combination of xxx from the mindfulness course and use of antidepressants in periods of wellness?</b>       | [ask this additional question if respondent says that both MBCT and ADM have had some value in questions 2.2 and 2.3., otherwise skip] |

### Section 3: Question on wobbles / early signs of depression (for all)

*“I’d like to ask about any times when you were well, but you felt yourself starting to ‘wobble’ or feel low. So any times when you might have felt that your mood was dipping or you were starting to have more of the negative thoughts that were around when you were depressed”*

| Interview Question                                                                                                                                              | Probes/Examples/Directions                                                                                                                                                                   |
|-----------------------------------------------------------------------------------------------------------------------------------------------------------------|----------------------------------------------------------------------------------------------------------------------------------------------------------------------------------------------|
| <b>3.1. How did these experiences of ‘wobbles’ or starting to feel low compare to previous experiences of wobbles?</b>                                          | Use timeline to go right into the situation shortly before, during and directly after episode.<br>Probe: What happened, how was it different? What did you do?<br>How did you get out of it? |
| <b>3.2. Was anything from the mindfulness course useful at the time of wobbling or when starting to feel low during the trial? If so, can you describe how?</b> | Probe: before/during/after wobble<br>Examples: any techniques, ideas; response plan, self-compassion etc.<br>Prompts: How / why / why not?                                                   |
| <b>3.3 Did your use of antidepressants during the trial play a part in wobbling or starting to feel low during the trial? If so, can you describe how?</b>      | Prompts: How / why / why not?                                                                                                                                                                |
| <b>3.4 What about the combination of xxx from the mindfulness course and use of antidepressants in periods of wobbling or when starting to feel low?</b>        | [ask this additional question if respondent says that both MBCT and ADM have had some value, otherwise skip as appropriate]                                                                  |

#### Section 4: Experiences of depressive relapse (for those who have relapsed)

Use the timeline to guide question choices in relation to experiences of relapse.

Say: "I'd like to ask you about your experiences this / these episode of depression..."

| Interview Question                                                                                                                   | Probes/Examples/Directions                                                                                                                                                                    |
|--------------------------------------------------------------------------------------------------------------------------------------|-----------------------------------------------------------------------------------------------------------------------------------------------------------------------------------------------|
| <b>4.1. How did this episode of depression compare to previous episodes of depression?</b>                                           | Use timeline to take them right into the situation shortly before, during and directly after episode. Probe: What happened, how was it different? What did you do? How did you get out of it? |
| <b>4.2. Was anything from the mindfulness course useful at the time of depression? If so, can you describe how?</b>                  | Examples: any techniques, ideas; response plan<br>Prompts: How / why / why not?                                                                                                               |
| <b>4.3. Did your use of antidepressants during the trial play a part in this episode of depression? If so, can you describe how?</b> | Prompts: How / why / why not?                                                                                                                                                                 |
| <b>4.4 What about the combination of xxx from the mindfulness course and use of antidepressants in periods of depression?</b>        | [ask this additional question if respondent says that both MBCT and ADM have had some value, otherwise skip as appropriate]                                                                   |

#### Section 5: MBCT and ADMs combined

"I'd like to end with some open questions about your experiences of taking part in this study."

For sakes of time keeping and for keeping this section contained it is critical how the questions are set up. Encourage people to step back from and reflect critically on their own experience rather than letting them share their raw experience. Use formulations like the following: *'I am sure that this was an intensive time for you. If you took yourself away from the experience today and were to reflect on this, what may I ask are the key elements/thoughts that you would have with regards to staying well etc.?'*

| Interview Question                                                                                                 | Probes/Examples/Directions                                                                                                             |
|--------------------------------------------------------------------------------------------------------------------|----------------------------------------------------------------------------------------------------------------------------------------|
| <b>5.1. Has taking part in the trial changed the way you think about depression? If so, could you tell me how?</b> | Probe: How/why /why not?<br>Probe: Has it changed the way you think about the causes/consequences of depression? Role of GP.           |
| <b>5.2. Has taking part in the trial changed how you think about yourself? If so, could you tell me how?</b>       | Probe: how identity was before the trial if person describes a sense of change.<br>Examples: Role of group, immediate and wider social |

|                                                                                                                                                        |                                                                                                                                                                |
|--------------------------------------------------------------------------------------------------------------------------------------------------------|----------------------------------------------------------------------------------------------------------------------------------------------------------------|
|                                                                                                                                                        | environment                                                                                                                                                    |
| <b>5.3. Now that you have had experiences of both mindfulness and antidepressants, what do you think of each of them as treatments for depression?</b> | Probes: do you favour one over the other? In combination? At different points e.g. in wellness, wobbles and depressive episodes? For prevention? For recovery? |
| <b>5.4. Apart from depression, has taking part in the trial had any impact on other psychological or physical health problems you may have?</b>        | Examples: Anxieties/phobias, Chronic health conditions like pain, diabetes etc.                                                                                |

## Section 6: Ending

*“I’ve covered all the questions we have, but before we end, is there anything you would like to add?”*

| Interview Question                                                                                                                  | Probes/Examples/Directions |
|-------------------------------------------------------------------------------------------------------------------------------------|----------------------------|
| <b>6.1. ...about any of the topics we have discussed?</b>                                                                           |                            |
| <b>6.2. ...about any of your experiences of depression, mindfulness or antidepressant medication that we have not talked about?</b> |                            |
| <b>6.3. ...about anything else you think is relevant to this project on MBCT, antidepressants, and depression?</b>                  |                            |

End by thanking the respondent for their time and for sharing their views and experiences. Reiterate how valuable this is for research trying to develop treatments for depression. Inform them about further dissemination of PREVENT findings.

1  
2  
3  
4  
5  
6  
7  
8  
9  
10  
11  
12  
13  
14  
15  
16  
17  
18  
19  
20  
21  
22  
23  
24  
25  
26  
27  
28  
29  
30  
31  
32  
33  
34  
35  
36  
37  
38  
39  
40  
41  
42  
43  
44  
45  
46  
47  
48  
49  
50  
51  
52  
53  
54  
55  
56  
57  
58  
59  
60

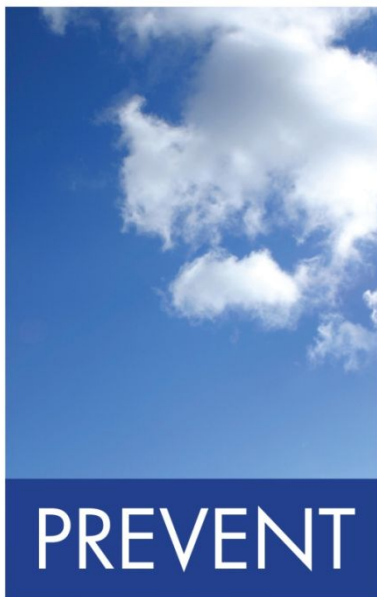

For peer review only

# 1-month Feedback Booklet



## PREVENT Feedback Booklet

As researchers, we are very aware that we are working with people. In this case, a specific group of people who have all suffered from depression at times in their lives. We are careful to never lose sight of the fact that each person is also an individual with their own personality, feelings, and experiences.

One of our aims is to find out about the thoughts, feelings and experiences of the people taking part in this research project at two time points: 4-6 weeks after your final session of MBCT, and again at the end of your involvement in the project. We want to hear your individual views because we think that we can learn a lot from them.

Please take time to think about the questions in this booklet and answer them in your own words. It might be useful to read through the questions before writing your answers, in order to become familiar with them. Tell us exactly what you think! We won't be offended if you didn't like some parts, or even all, of the project. If you found some or all of it useful, helpful or enjoyable, then tell us that too, and please tell us why.

There are 11 questions in the booklet. Write as much, or as little as you like. If you feel that you have more to say than there is space for then please call us on 01392 726102 and we'll provide you with a second booklet.

As we have said in the past, we guarantee your privacy and confidentiality. Nothing that you say here will be published or printed in any way that could identify you, and no unauthorised person will ever read this booklet.

Once you have completed the booklet, please return it to us in the envelope provided. The envelope has a freepost sticker on it, so you do not need to pay for postage.

Finally, many thanks for the effort you have put in to this project so far. Hopefully our research will enable us to develop new and better ways to help people stay well after depression.

The PREVENT Team

PREVENT Trial ID: \_\_\_\_\_

PREVENT Feedback Booklet 1.1 v2. 02.10.10

## Reducing your antidepressants

The first set of questions aims to explore your **thoughts** towards, and **experiences** of, taking and reducing your antidepressant medication.

1. Please describe your experiences of using antidepressants before taking part in the MBCT course. For example, did you feel that antidepressants were having a positive impact upon your day-to-day life and functioning? Did you experience any difficulties taking antidepressants in the past? Please explain why.

.....

.....

.....

.....

.....

.....

.....

.....

2. During the MBCT course you were asked to try to reduce your use of antidepressants. Please can you describe what your **thoughts** were towards reducing your antidepressants directly before the MBCT course started and again during the MBCT course when you were asked to try reducing them?

Thoughts about reducing antidepressants *before* the MBCT course:

.....

.....

.....

.....

.....

.....

.....

Thoughts about reducing antidepressants *during* the MBCT course:

.....

.....

.....

.....

.....

.....

.....

1  
2 2. Can you please describe your **experiences** of reducing your use of antidepressants  
3 during the MBCT course up until this point now?

4 For example, have you started to reduce your antidepressants? (If YES, please  
5 continue below. If NO, please go to Question 3)  
6  
7

8 When did you start reducing your antidepressants? (Please be as specific as possible  
9 about the date)  
10  
11

12 .....  
13  
14  
15  
16 What positive impact, if any, has reducing your antidepressants had on your day-to-  
17 day life and functioning?  
18

19 .....  
20 .....  
21 .....  
22 .....  
23 .....  
24 .....  
25 .....  
26

27  
28  
29 What difficulties, if any, did you experience when reducing your antidepressants?  
30

31 .....  
32 .....  
33 .....  
34 .....  
35 .....  
36 .....  
37 .....  
38 .....  
39 .....  
40 .....  
41

42  
43  
44 Did you do anything in particular to overcome these difficulties?  
45

46 .....  
47 .....  
48 .....  
49 .....  
50 .....  
51 .....  
52 .....  
53 .....  
54 .....  
55 .....  
56

1  
2  
3  
4  
5  
6  
7  
8  
9  
10  
11  
12  
13  
14  
15  
16  
17  
18  
19  
20  
21  
22  
23  
24  
25  
26  
27  
28  
29  
30  
31  
32  
33  
34  
35  
36  
37  
38  
39  
40  
41  
42  
43  
44  
45  
46  
47  
48  
49  
50  
51  
52  
53  
54  
55  
56  
57  
58  
59  
60

If you have tried reducing your antidepressants in the past, please describe if your experiences of reducing your antidepressants recently has been different, and if so, in what ways. If there has been no difference, please let us know.

.....  
.....  
.....  
.....  
.....  
.....

3. It would be useful for us to know more about why people who take part in this research study do not reduce their antidepressants. Please could you describe why you have not reduced your antidepressant medication at this stage in the research study?

.....  
.....  
.....  
.....  
.....  
.....  
.....  
.....  
.....  
.....  
.....

For peer review only

## Taking part in MBCT

The questions in this section aim to find out more about your experiences of taking part in MBCT, and continuing the MBCT exercises after the course.

4. Out of the 8 week course, how many MBCT sessions did you attend?

..... out of 8 sessions.

5. Did you attend the first MBCT follow-up session? YES / NO

6. What, if any, MBCT exercises are you still practicing? Please tick the ones you are still practicing and in the space provided write how often you practice (e.g. per week or per month).

None

Body scan

.....

Sitting meditation

.....

10-min sit

.....

20-min sit

.....

Silence with bells

.....

Breathing space (regular, 3 times a day)

.....

Breathing space ('coping' space)

.....

Mindful walking

.....

Stretch and breath

.....

Mindful activities (please specify what, and how often per week or month)

.....

Other (please specify)

.....

.....

1  
2 7. Please describe anything that you may have found **helpful** about taking part in the  
3 MBCT course and practicing the mindfulness meditation exercises, **and why**.  
4  
5

6 Specific aspects of the MBCT course you found **helpful**, and why:  
7

8 .....  
9 .....  
10 .....  
11 .....  
12 .....  
13 .....  
14 .....  
15 .....  
16 .....  
17 .....  
18 .....  
19 .....  
20 .....  
21 .....  
22 .....  
23 .....

24  
25  
26  
27  
28  
29  
30  
31 Specific aspects of the meditation practices and teachings that you found **helpful**,  
32 and why:  
33

34 .....  
35 .....  
36 .....  
37 .....  
38 .....  
39 .....  
40 .....  
41 .....  
42 .....  
43 .....  
44 .....  
45 .....  
46 .....  
47 .....  
48 .....  
49 .....

1  
2 8. Please describe anything that you may have found **unhelpful** about taking part in  
3 the MBCT course and practicing the mindfulness meditation exercises, and **why**.  
4  
5

6  
7 Specific aspects of the MBCT course that you found **unhelpful**, and why:  
8

9 .....  
10 .....  
11 .....  
12 .....  
13 .....  
14 .....  
15 .....  
16 .....  
17 .....  
18 .....  
19 .....  
20 .....  
21 .....  
22 .....  
23 .....

24  
25  
26  
27  
28  
29  
30  
31 Specific aspects of the MBCT practices and teachings that you found **unhelpful**, and  
32 why:  
33

34 .....  
35 .....  
36 .....  
37 .....  
38 .....  
39 .....  
40 .....  
41 .....  
42 .....  
43 .....  
44 .....  
45 .....  
46 .....  
47 .....  
48 .....  
49 .....

1  
2  
3 **The Impact of MBCT**

4 The final two questions relate to the **impact**, if any, that MBCT may have had on you.

5  
6 9. Have you benefitted from the MBCT course and practicing the MBCT exercises? If  
7 so, in what ways? (We are interested to hear about benefits not only in how you feel,  
8 but in any other areas of your life). If there have been no benefits or that some things  
9 are worse now, please tell us about these.  
10  
11

12 .....  
13 .....  
14 .....  
15 .....  
16 .....  
17 .....  
18 .....  
19 .....  
20 .....  
21 .....  
22 .....  
23 .....  
24 .....  
25 .....  
26 .....  
27 .....  
28 .....  
29 .....  
30 .....  
31 .....  
32 .....  
33 .....  
34 .....  
35

36  
37  
38  
39 10. Do you feel that MBCT **works for you**? If so, why do you think it works? If it  
40 doesn't work for you, please tell us why you think it doesn't work.  
41

42 .....  
43 .....  
44 .....  
45 .....  
46 .....  
47 .....  
48 .....  
49 .....  
50 .....  
51 .....  
52 .....  
53 .....  
54 .....  
55 .....  
56 .....  
57 .....  
58 .....  
59 .....  
60



1  
2 **Any other comments:**  
3

4  
5 11. Do you have any other comments that you would like to share about your  
6 experiences of taking part in this project?  
7

8 .....  
9 .....  
10 .....  
11 .....  
12 .....  
13 .....  
14 .....  
15 .....  
16 .....  
17 .....  
18 .....  
19 .....  
20 .....  
21 .....  
22 .....  
23 .....  
24 .....  
25 .....  
26 .....  
27 .....  
28 .....  
29 .....  
30 .....  
31 .....  
32 .....

For peer review only

33  
34  
35  
36  
37  
38  
39  
40  
41  
42  
43  
44  
45  
46  
47  
48  
49  
50  
51  
52  
53  
54  
55  
56  
57  
58  
59  
60

1  
2  
3  
4  
5  
6  
7  
8  
9  
10  
11  
12  
13  
14  
15  
16  
17  
18  
19  
20  
21  
22  
23  
24  
25  
26  
27  
28  
29  
30  
31  
32  
33  
34  
35  
36  
37  
38  
39  
40  
41  
42  
43  
44  
45  
46  
47  
48  
49  
50  
51  
52  
53  
54  
55  
56  
57  
58  
59  
60

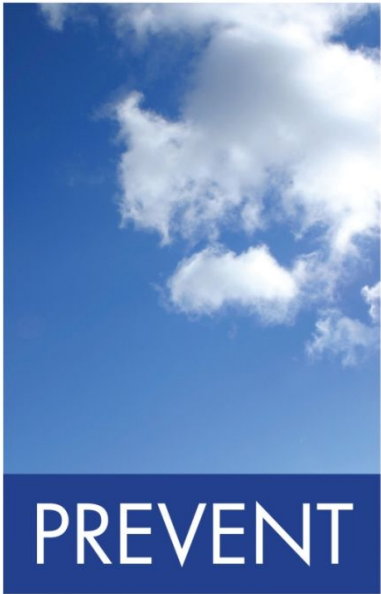

# 24-month Feedback Booklet

For peer review only

## PREVENT 24-month Feedback Booklet

As researchers, we are very aware that we are working with people. In this case, a specific group of people who have all suffered from depression at times in their lives. We are careful to never lose sight of the fact that each person is also an individual with their own personality, feelings, and experiences.

One of our aims is to find out about the thoughts, feelings and experiences of the people taking part in this research project. We asked you to complete a feedback booklet in the weeks after attending MBCT, and we would be really grateful if you could now complete a second feedback booklet to explore your experiences of taking part in the project over the past two years. We want to hear your individual views because we think that we can learn a lot from them.

Please take time to think about the questions in this booklet and answer them in your own words. It might be useful to read through the questions before writing your answers, in order to become familiar with them. Tell us exactly what you think! We won't be offended if you didn't like some parts, or even all, of the project. If you found some or all of it useful, helpful or enjoyable, then tell us that too, and please tell us why.

**There are 4 parts to this booklet and 27 questions in total, although not all of them will apply to you. Please read the instructions throughout the booklet to check which questions are relevant to you.**

Please write as much, or as little, as you like. If you feel that you have more to say than there is space for then please use the back sheet to write any additional feedback.

As we have said in the past, we guarantee your privacy and confidentiality. Nothing that you say here will be published or printed in any way that could identify you, and no unauthorised person will ever read this booklet.

Once you have completed the booklet please give it to your PREVENT researcher at the 24-month assessment.

Finally, many thanks for the effort you have put in to this project. Hopefully our research will enable us to develop new and better ways to help people stay well after depression.

The PREVENT Team

PREVENT Trial ID: \_\_\_\_\_

## Part I: Experiences of Reunions

Following your MBCT course you were invited to attend four MBCT reunion sessions.

1. How many did you attend? (Please circle)

None            1            2            3            4

2. Were there any specific reasons for attending this number of reunion sessions?

.....

.....

.....

.....

.....

.....

.....

.....

.....

**If you didn't attend any reunions, please go to Part II on page 4.**

**If you attended some or all reunion sessions, please continue below.**

3. Please describe what you found helpful and / or unhelpful about the reunion sessions?

.....

.....

.....

.....

.....

.....

.....

.....

.....

1  
2  
3  
4  
5  
6  
7  
8  
9  
10  
11  
12  
13  
14  
15  
16  
17  
18  
19  
20  
21  
22  
23  
24  
25  
26  
27  
28  
29  
30  
31  
32  
33  
34  
35  
36  
37  
38  
39  
40  
41  
42  
43  
44  
45  
46  
47  
48  
49  
50  
51  
52  
53  
54  
55  
56  
57  
58  
59  
60

4. Have you used any other support to maintain your mindfulness practice (for example, keeping in contact with anyone from your MBCT course, or joining local meditation groups)? Please describe how this has been helpful and / or unhelpful and why.

.....

.....

.....

.....

.....

.....

.....

.....

.....

.....

For peer review only

## Part II: Doing Mindfulness Practices

Which of the following statements best describes your use of mindfulness techniques (both formal practices and other mindful activities) over the past two years? Please tick one box and then follow the instructions for which question to complete next:

- I've used mindfulness techniques regularly over the last 2 years (please continue to Question 5)
- I used mindfulness techniques for a while after the MBCT course but my practice has tailed off and I no longer practice (please continue to Question 5)
- I've used mindfulness techniques off and on during the last 2 years (please continue to Question 5)
- I have not used mindfulness techniques at all since the MBCT course (please go to Question 7)

5. Please complete the two tables below to tell us which techniques you have practiced over the past two years and what you are currently practicing.

The following table provides a list of mindfulness practices from the MBCT course.

|                                                          | Currently        | Over the past two years                                                                        |
|----------------------------------------------------------|------------------|------------------------------------------------------------------------------------------------|
| <b>Example: Body Scan</b>                                | 2 times per week | <i>Regularly for about 3 months after the course but then stopped. Restarted 2 months ago.</i> |
| <b>Body Scan</b>                                         | times per        |                                                                                                |
| <b>Sitting Meditation</b>                                | times per        |                                                                                                |
| <b>10-minute sit</b>                                     | times per        |                                                                                                |
| <b>20-minute sit</b>                                     | times per        |                                                                                                |
| <b>Silence with Bells</b>                                | times per        |                                                                                                |
| <b>Breathing Space<br/>(Regular, e.g. 3 times a day)</b> | times per        |                                                                                                |
| <b>Breathing Space<br/>(‘Coping’ space)</b>              | times per        |                                                                                                |
| <b>Mindful Walking</b>                                   | times per        |                                                                                                |
| <b>Mindful Movement / Yoga</b>                           | times per        |                                                                                                |

The following table gives you space to record any mindful activities you've practiced.

| Mindful Activities                        | Currently            | Over the past two years                                                         |
|-------------------------------------------|----------------------|---------------------------------------------------------------------------------|
| <i>E.g., being mindful when showering</i> | <i>Every morning</i> | <i>Every morning, although I stopped for roughly 3 months about a year ago.</i> |
|                                           |                      |                                                                                 |
|                                           |                      |                                                                                 |
|                                           |                      |                                                                                 |
|                                           |                      |                                                                                 |
|                                           |                      |                                                                                 |

6. Have you adapted any of the mindfulness exercises you learned in the MBCT course to suit you? If so, how? Why did you make these changes?

.....

.....

.....

.....

.....

.....

.....

.....

.....

.....

7. If you do not currently practice any mindfulness techniques, please describe why.

.....

.....

.....

.....

.....

.....

.....

.....

.....

.....



### Part III: The impact of MBCT and mindfulness practice

8. Do you feel that MBCT “works” for you? If so, how do you think it works? If you would like to, please use examples from your life.

.....

.....

.....

.....

.....

.....

.....

.....

.....

.....

.....

9. What is the single most important thing that you’ve learned through attending the MBCT course or practicing mindfulness techniques? Please explain your answer.

.....

.....

.....

.....

.....

.....

.....

.....

.....

.....

10. MBCT may not be the right treatment for everyone. If you feel that MBCT was not right for you, please tell us why.

.....

.....

.....

.....

.....

.....

.....

.....

.....

.....

11. What changes, if any, would you make to the MBCT course and / or mindfulness exercises to make them more suitable for you?

.....

.....

.....

.....

.....

.....

.....

.....

.....

.....

.....

.....

For peer review only

1  
2  
3  
4  
5  
6  
7  
8  
9  
10  
11  
12  
13  
14  
15  
16  
17  
18  
19  
20  
21  
22  
23  
24  
25  
26  
27  
28  
29  
30  
31  
32  
33  
34  
35  
36  
37  
38  
39  
40  
41  
42  
43  
44  
45  
46  
47  
48  
49  
50  
51  
52  
53  
54  
55  
56  
57  
58  
59  
60

1  
2  
3  
4 **Part IV: Taking antidepressants**  
5

6 **We are interested in learning more about your experiences of taking and reducing**  
7 **antidepressants over the past two years.**  
8

9  
10  
11 12. Have your thoughts about reducing your antidepressants changed over the past  
12 two years? If so, in what ways?  
13

14 .....  
15 .....  
16 .....  
17 .....  
18 .....  
19 .....  
20 .....  
21 .....  
22 .....  
23 .....  
24

25  
26  
27 13. Does taking antidepressant medication “work” for you? If so, please tell us why. If  
28 taking antidepressants does not “work” for you, please also tell us why. If you would  
29 like to, please use examples from your life.  
30

31 .....  
32 .....  
33 .....  
34 .....  
35 .....  
36 .....  
37 .....  
38 .....  
39 .....  
40 .....  
41

42  
43  
44 14. What role has your GP had in your use of antidepressant medication over the past  
45 two years? How have you found this?  
46

47 .....  
48 .....  
49 .....  
50 .....  
51 .....  
52 .....  
53 .....  
54 .....  
55 .....  
56 .....  
57

1  
2  
3 15. Has anyone else been involved in your use of antidepressant medication over the  
4 past two years? (E.g., psychiatrist, family member, another practitioner). If so, in  
5 what ways?  
6  
7

8 .....  
9 .....  
10 .....  
11 .....  
12 .....  
13 .....  
14 .....  
15 .....  
16 .....  
17 .....

18  
19  
20  
21  
22  
23 Which of the following best describes your use of antidepressants over the last two  
24 years? Please tick one box and follow the instructions for which questions to  
25 complete next.  
26

- 27  
28  
29  I have continued using antidepressants and have not reduced my use at any  
30 point over the past two years that I've been involved in this study. (Tick this  
31 box even if you have changed to a different antidepressant, or increased the  
32 dosage of your antidepressant.)  
33

34 Please answer the questions in the  box on the following page.  
35  
36

- 37  
38  
39  
40  I am in the process of reducing my antidepressants, or have reduced/stopped  
41 my use of antidepressants at some point over the past two years that I've  
42 been involved in this study. (Tick this box even if you restarted or increased  
43 your medication at a later date.)  
44

45 Please answer the questions in the  box on page 12  
46  
47  
48  
49  
50  
51  
52  
53  
54  
55  
56  
57  
58  
59  
60

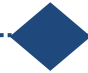

1  
2  
3  
4  
5 16. In your day-to-day life and functioning over the past two years, have you  
6 experienced any positive effects of continuing to use antidepressants? If so, please  
7 describe these.  
8  
9

10 .....  
11 .....  
12 .....  
13 .....  
14 .....  
15 .....  
16 .....  
17 .....  
18  
19 17. In your day-to-day life and functioning over the past two years, have you  
20 experienced any negative effects or difficulties in continuing to use antidepressants?  
21 If so, please describe these.  
22  
23

24 .....  
25 .....  
26 .....  
27 .....  
28 .....  
29 .....  
30 .....  
31 .....  
32 .....  
33 .....  
34  
35 18. Have you done anything specific to overcome these negative effects or  
36 difficulties? If so, what have you done?  
37  
38

39 .....  
40 .....  
41 .....  
42 .....  
43 .....  
44 .....  
45 .....  
46 .....  
47 .....  
48  
49 19. Please describe why you haven't reduced your antidepressant medication over the  
50 past two years.  
51  
52

53 .....  
54 .....  
55 .....  
56 .....  
57 .....  
58 .....  
59 .....  
60  
**Please now go to Question 27 on page 11.**

1  
2  
3  
4  
5  
6 20. Has reducing your use of antidepressants had any positive effects on your day-to-  
7 day life and functioning over the past two years? If so, please describe how.  
8  
9

10  
11  
12  
13  
14  
15  
16  
17  
18  
19 21. Have you experienced any negative effects or difficulties associated with reducing  
20 your antidepressants over the past two years? If so, please describe them.  
21  
22

23  
24  
25  
26  
27  
28  
29  
30  
31  
32 22. Have you done anything specific to overcome these negative effects or  
33 difficulties? If so, what have you done?  
34  
35

36  
37  
38  
39  
40  
41  
42  
43  
44  
45  
46 23. Has practicing mindfulness techniques helped with these negative effects or  
47 difficulties? If so, in what ways?  
48  
49

50  
51  
52  
53  
54  
55  
56  
57  
58  
59  
60  
Continued...

Continued...

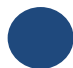

1  
2  
3  
4  
5  
6 24. Have you stopped using antidepressant medication completely, now or at any  
7 point in the last two years? Please describe your experiences of this.  
8  
9

10 .....  
11 .....  
12 .....  
13 .....  
14 .....  
15 .....  
16 .....  
17 .....

18  
19 25. Have you tried reducing your antidepressants at any point before this study? If so,  
20 please tell us of any ways that reducing your antidepressants over the past two years  
21 been different? If there has been no difference, why do you think this is the case?  
22  
23

24 .....  
25 .....  
26 .....  
27 .....  
28 .....  
29 .....  
30 .....  
31 .....

32  
33 26. Have you reduced or stopped your antidepressants over the past two years and  
34 then restarted or increased them again? If so, please tell us about this, and how you  
35 felt about this?  
36  
37

38 .....  
39 .....  
40 .....  
41 .....  
42 .....  
43 .....  
44 .....  
45 .....  
46 .....

47  
48  
49 **Please go to Question 27 on the following page.**  
50  
51

1  
2  
3 **Any other comments?**  
4

5 **27. Thank you for taking the time to complete this booklet - your participation is**  
6 **greatly appreciated!** If you have any other comments that you would like to share  
7 about your experiences of taking part in this project which did not fit into any of the  
8 answer spaces above, please use the space below.  
9

10 .....  
11 .....  
12 .....  
13 .....  
14 .....  
15 .....  
16 .....  
17 .....  
18 .....  
19 .....  
20 .....  
21 .....  
22 .....  
23 .....  
24 .....  
25 .....  
26 .....  
27 .....  
28 .....  
29 .....  
30 .....  
31 .....  
32 .....  
33 .....  
34 .....  
35 .....

For peer review only



# BMJ Open

## RECOVERY FROM RECURRENT DEPRESSION WITH MINDFULNESS-BASED COGNITIVE THERAPY AND ANTIDEPRESSANTS: A QUALITATIVE STUDY WITH ILLUSTRATIVE CASE STUDIES

|                                 |                                                                                                                                                                                                                                                                                                                                                                                                                                                                                                                                                                                                                                                           |
|---------------------------------|-----------------------------------------------------------------------------------------------------------------------------------------------------------------------------------------------------------------------------------------------------------------------------------------------------------------------------------------------------------------------------------------------------------------------------------------------------------------------------------------------------------------------------------------------------------------------------------------------------------------------------------------------------------|
| Journal:                        | <i>BMJ Open</i>                                                                                                                                                                                                                                                                                                                                                                                                                                                                                                                                                                                                                                           |
| Manuscript ID                   | bmjopen-2019-033892.R1                                                                                                                                                                                                                                                                                                                                                                                                                                                                                                                                                                                                                                    |
| Article Type:                   | Research                                                                                                                                                                                                                                                                                                                                                                                                                                                                                                                                                                                                                                                  |
| Date Submitted by the Author:   | 08-Jan-2020                                                                                                                                                                                                                                                                                                                                                                                                                                                                                                                                                                                                                                               |
| Complete List of Authors:       | Tickell, Alice; University of Oxford, Psychiatry<br>Byng, Richard; University of Plymouth, Community and Primary Care Research Group<br>Crane, Catherine; University of Oxford, Psychiatry<br>Gradinger, Felix; Plymouth University, Community and Primary Care Research Group<br>Hayes, Rachel; University of Exeter, College of Medicine and Health<br>Robson, James; University of Oxford, Education<br>Cardy, Jessica; Oxford University, Oxford Institute of Clinical Psychology Training<br>Weaver, Alice; Devon Partnership NHS Trust<br>Morant, Nicola; University College London, Psychiatry<br>Kuyken, Willem; University of Oxford, Psychiatry |
| <b>Primary Subject Heading</b>: | Mental health                                                                                                                                                                                                                                                                                                                                                                                                                                                                                                                                                                                                                                             |
| Secondary Subject Heading:      | Health services research                                                                                                                                                                                                                                                                                                                                                                                                                                                                                                                                                                                                                                  |
| Keywords:                       | Depression & mood disorders < PSYCHIATRY, psychological therapy, antidepressants                                                                                                                                                                                                                                                                                                                                                                                                                                                                                                                                                                          |
|                                 |                                                                                                                                                                                                                                                                                                                                                                                                                                                                                                                                                                                                                                                           |

SCHOLARONE™  
Manuscripts



I, the Submitting Author has the right to grant and does grant on behalf of all authors of the Work (as defined in the below author licence), an exclusive licence and/or a non-exclusive licence for contributions from authors who are: i) UK Crown employees; ii) where BMJ has agreed a CC-BY licence shall apply, and/or iii) in accordance with the terms applicable for US Federal Government officers or employees acting as part of their official duties; on a worldwide, perpetual, irrevocable, royalty-free basis to BMJ Publishing Group Ltd ("BMJ") its licensees and where the relevant Journal is co-owned by BMJ to the co-owners of the Journal, to publish the Work in this journal and any other BMJ products and to exploit all rights, as set out in our [licence](#).

The Submitting Author accepts and understands that any supply made under these terms is made by BMJ to the Submitting Author unless you are acting as an employee on behalf of your employer or a postgraduate student of an affiliated institution which is paying any applicable article publishing charge ("APC") for Open Access articles. Where the Submitting Author wishes to make the Work available on an Open Access basis (and intends to pay the relevant APC), the terms of reuse of such Open Access shall be governed by a Creative Commons licence – details of these licences and which [Creative Commons](#) licence will apply to this Work are set out in our licence referred to above.

Other than as permitted in any relevant BMJ Author's Self Archiving Policies, I confirm this Work has not been accepted for publication elsewhere, is not being considered for publication elsewhere and does not duplicate material already published. I confirm all authors consent to publication of this Work and authorise the granting of this licence.

1  
2  
3 **RECOVERY FROM RECURRENT DEPRESSION WITH MINDFULNESS-BASED**  
4  
5 **COGNITIVE THERAPY AND ANTIDEPRESSANTS: A QUALITATIVE STUDY WITH**  
6  
7 **ILLUSTRATIVE CASE STUDIES**  
8  
9  
10  
11  
12

13 Alice Tickell, Department of Psychiatry, University of Oxford, [alice.tickell@psych.ox.ac.uk](mailto:alice.tickell@psych.ox.ac.uk)  
14

15  
16 Richard Byng, Community and Primary Care Research Group, University of Plymouth,  
17  
18 [richard.byng@plymouth.ac.uk](mailto:richard.byng@plymouth.ac.uk)  
19

20  
21  
22 Catherine Crane, Department of Psychiatry, University of Oxford, [catherine.crane@psych.ox.ac.uk](mailto:catherine.crane@psych.ox.ac.uk)  
23

24  
25 Felix Gradinger, Community and Primary Care Research Group, University of Plymouth,  
26  
27 [felix.gradinger@plymouth.ac.uk](mailto:felix.gradinger@plymouth.ac.uk)  
28

29  
30 Rachel Hayes, College of Medicine and Health, University of Exeter, [r.a.hayes@exeter.ac.uk](mailto:r.a.hayes@exeter.ac.uk)  
31

32  
33 James Robson, Department of Education, University of Oxford, [james.robson@education.ox.ac.uk](mailto:james.robson@education.ox.ac.uk)  
34

35  
36 Jessica Cardy, Oxford Institute of Clinical Psychology Training, University of Oxford,  
37  
38 [jessica.cardy@hmc.ox.ac.uk](mailto:jessica.cardy@hmc.ox.ac.uk)  
39

40  
41 Alice Weaver, Devon Partnership NHS Trust, [a.weaver@exeter.ac.uk](mailto:a.weaver@exeter.ac.uk)  
42

43  
44 Nicola Morant, Division of Psychiatry, University College London, [n.morant@ucl.ac.uk](mailto:n.morant@ucl.ac.uk)  
45

46  
47 Willem Kuyken, Department of Psychiatry, University of Oxford, [willem.kuyken@psych.ox.ac.uk](mailto:willem.kuyken@psych.ox.ac.uk)  
48

49  
50  
51 Correspondence concerning the article should be addressed to Professor Willem Kuyken, Department  
52  
53 of Psychiatry, Warneford Hospital, Oxford, OX3 7JX.

54  
55 Email: [willem.kuyken@psych.ox.ac.uk](mailto:willem.kuyken@psych.ox.ac.uk)  
56

57  
58  
59 **Word Count** 7900 (excluding title page, abstract, references, figures, and tables)  
60

## DISCONTINUING ANTIDEPRESSANT MEDICATION

**Contributor Statement**

WK, RB & NM were responsible for the PREVENT trial protocol and secured the study funding. NM designed the over-arching qualitative process study to elicit service users' experiences of treatment, with input from RB, FG, RH, JC, and WK. Interviews were conducted by FG and AW, supervised by NM. CC, WK, JR, and AT developed the analytical strategy and protocol for the study reported here, and AT conducted the bulk of the analysis, with input from other members of the analytical team. AT, CC, and WK drafted the manuscript. All other authors read the manuscript, revised it for significant intellectual content, and approved the final manuscript. As Chief Investigator, WK had overall responsibility for the parent trial within which this study was embedded. The University of Exeter held responsibility for the parent trial and this work. WK is guarantor and corresponding author for the study.

**Competing Interest Statement**

All authors have completed the ICMJE uniform disclosure form at [www.icmje.org/coi\\_disclosure.pdf](http://www.icmje.org/coi_disclosure.pdf) and declare the following: AT reports that she is employed as a researcher at the University of Oxford Mindfulness Centre, conducting research on mindfulness-based interventions. However, she receives no additional remuneration for teaching or publications related to mindfulness-based approaches. RB has written about his concerns about the increases in prescribing of antidepressants. CC reports that she is employed as a researcher at the University of Oxford Mindfulness Centre, conducting research on mindfulness-based interventions. However, she receives no additional remuneration for teaching or publications related to mindfulness-based approaches. WK is the Director of the Oxford Mindfulness Centre. He receives no payments for training workshops and presentations related to MBCT; such payments are made directly to the Oxford Mindfulness Foundation, a charitable trust that supports the work of the Oxford Mindfulness Centre. He receives royalties for his book *Mindfulness: Ancient wisdom meets modern psychology* published by Guilford Press. WK was until 2015 an unpaid Director of the Mindfulness Network Community Interest Company and gave evidence to the UK Mindfulness All Party Parliamentary Group. FG, RH, JR, JC, AW, and NM have nothing to disclose.

## DISCONTINUING ANTIDEPRESSANT MEDICATION

**Transparency Statement**

WK confirms that the manuscript is an honest, accurate, and transparent account of the study being reported; that no important aspects of the study have been omitted; and that any discrepancies from the study as originally planned have been explained. He attests that all listed authors meet authorship criteria and that no others meeting the criteria have been omitted.

**Funding Statement**

The PREVENT trial was funded by the National Institute for Health Research Health Technology Assessment (NIHR HTA) Programme [08/56/01] and was published in full in Health Technology Assessment. The views and opinions expressed therein are those of the authors and do not necessarily reflect those of the HTA programme, NIHR, NHS or the Department of Health and Social Care. A Trial Steering Committee (TSC), Data and Ethics Monitoring Committee (DMEC), the UK Mental Health Research Network (MHRN), the Primary Care Research Network (PCRN), and the Comprehensive Local Research Network (CLRN) all provided support to the project. WK, CC and AT are supported by the Wellcome Trust [107496/Z/15/Z]. RB received funding from NIHR Collaboration for Leadership in Applied Health Research and Care South West Peninsula.

The funders had no role in the design of the study, in the collection, analysis and interpretation of the data, in the writing of the report, or in the decision to submit the article for publication. All authors are independent of the funders, had full access to all of the data in the study, and can take responsibility for the integrity of the data and the accuracy of the data analysis.

**License**

The Corresponding Author has the right to grant on behalf of all authors and does grant on behalf of all authors, a [worldwide licence](#) to the Publishers and its licensees in perpetuity, in all forms, formats and media (whether known now or created in the future), to i) publish, reproduce, distribute, display and store the Contribution, ii) translate the Contribution into other languages, create adaptations, reprints, include within collections and create summaries, extracts and/or, abstracts of the Contribution and convert or allow conversion into any format including without limitation audio, iii)

## DISCONTINUING ANTIDEPRESSANT MEDICATION

1  
2  
3 create any other derivative work(s) based in whole or part on the on the Contribution, iv) to exploit all  
4 subsidiary rights to exploit all subsidiary rights that currently exist or as may exist in the future in the  
5 Contribution, v) the inclusion of electronic links from the Contribution to third party material where-  
6 ever it may be located; and, vi) licence any third party to do any or all of the above. All research  
7 articles will be made available on an open access basis. The terms of such open access shall be  
8 governed by a [Creative Commons](#) licence—details as to which Creative Commons licence will apply  
9 to the research article are set out in our worldwide licence referred to above.

**Acknowledgements**

10  
11  
12  
13  
14  
15  
16  
17  
18  
19  
20  
21 We would like to thank Trish Bartley for her input to MBCT therapist training and MBCT fidelity  
22 checks. We are grateful to members of our Trial Steering Committee (Chris Leach, Richard Moore  
23 and Glenys Parry) and Data Monitoring Committee (Paul Ewings, Andy Field and Joanne  
24 MacKenzie) for their valuable advice and support during the project. We acknowledge the additional  
25 support provided by the Mental Health and Primary Care Research Networks. We also acknowledge  
26 the support provided by the Department of Health and local Primary Care Trusts, in meeting the  
27 excess treatment and service support costs associated with the trial. Thanks go to the PREVENT  
28 research team, who facilitated wider qualitative work in the trial, including Aaron Causley, Anna  
29 Hunt, Pooja Shah, Holly Sugg, Harry Sutton, and Matthew Williams. Above all, we are grateful to the  
30 participants for their time in taking part in this trial.

**Data Sharing Statement**

31  
32  
33  
34  
35  
36  
37  
38  
39  
40  
41  
42  
43 We will not be making the data publicly available due to its highly confidential and identifiable  
44 nature.

**Dissemination Declaration**

45  
46  
47  
48  
49  
50  
51  
52  
53  
54  
55  
56  
57  
58  
59  
60  
The trial results were disseminated in workshops and via a flyer to all participants who requested this  
feedback. The findings of this study will be disseminated to relevant audiences through University of  
Oxford communications.

## DISCONTINUING ANTIDEPRESSANT MEDICATION

**ABSTRACT**

Objectives: This study aimed to describe the recovery journeys of people with a history of recurrent depression who took part in a psychosocial programme designed to teach skills to prevent depressive relapse (mindfulness-based cognitive therapy; MBCT), alongside maintenance antidepressant medication (ADM).

Design: A qualitative study embedded within a multicentre, single blind, randomised controlled trial (the PREVENT trial).

Setting: Primary care urban and rural settings in the United Kingdom.

Participants: 42 people who participated in the MBCT arm of the parent trial were purposively sampled to represent a range of recovery journeys.

Interventions: MBCT involves eight weekly group sessions, with four refresher sessions offered in the year following the end of the programme. It was adapted to offer bespoke support around ADM tapering and discontinuation.

Methods: Written feedback and structured in-depth interviews were collected in the two years after participants undertook MBCT. Data was analysed using thematic analysis and case studies constructed to illustrate the findings.

Results: People with recurrent depression have unique recovery journeys, that shape and are shaped by their pharmacological and psychological treatment choices. Their journeys typically include several over-arching themes: (1) beliefs about the causes of depression, both biological and psychosocial; (2) personal agency, including expectations about their role in recovery and treatment; (3) acceptance, both of depression itself and the recovery journey; (4) quality of life; (5) experiences and perspectives on ADM and ADM tapering-discontinuation, and; (6) the role of General Practitioners, both positive and negative.

Conclusions: People with recurrent depression describe unique, complex recovery journeys shaped by their experiences of depression, treatment and interactions with health professionals. Understanding how several themes coalesce for each individual can both support their recovery and treatment choices as well as health professionals in providing more accessible, collaborative, individualised and empowering care.

## DISCONTINUING ANTIDEPRESSANT MEDICATION

1  
2  
3 (292 words)  
4  
5  
6

7 **Strengths and limitations of the study**  
8  
9

10  
11  
12  
13 Recurrent depression is a leading cause of disability adjusted life years and ADM is the mainstay  
14 approach to treatment; this study is the first to describe people's experiences of recovery with an  
15 ADM alongside a psychosocial approach designed to support recovery (MBCT).  
16  
17

18  
19  
20 The sample was relatively large and purposively sampled to illustrate a range of recovery journeys  
21 and outcomes.  
22

23  
24 Participants experiences in the two years following MBCT were sampled, using an innovative  
25 approach to supporting participants' to describe the richness of their experiences of recovery and  
26 treatment.  
27  
28

29  
30 The sampling necessarily meant that we did not include people with a history of recurrent depression  
31 who were had decided against ADM, tapering and discontinuing their ADM and/or a psychological  
32 approaches.  
33  
34  
35  
36  
37  
38  
39  
40  
41  
42  
43  
44  
45  
46  
47  
48  
49  
50  
51  
52  
53  
54  
55  
56  
57  
58  
59  
60



## DISCONTINUING ANTIDEPRESSANT MEDICATION

1  
2  
3 Depression is a major public health problem. Globally more than 264 million people suffer  
4 from depression, and lifetime prevalence rates are estimated to be between 6-20%. [1, 2] Furthermore,  
5 depression can be a relapsing and recurring condition, and on average people who experience one  
6 episode of depression have seven or eight episodes over their lifetime. [3] Clinical guidance typically  
7 recommends that people with recurrent depression should take maintenance antidepressants (ADMs)  
8 after remission or engage in preventive psychological interventions to maintain recovery. [4] For people  
9 with recurrent depression, their recovery journey is shaped by their experiences of depression, “illness  
10 model,” interactions with mental health professionals, treatments that have and have not worked, and  
11 expectations about what recovery will entail. [5] For many, ADMs are an important part of their  
12 recovery. Reasons for long-term ADM use include positive experiences of ADMs, fear of relapse,  
13 perceived lack of alternatives, and concerns about withdrawal effects. [6] On the other hand, people  
14 also describe a number of reasons for wanting to discontinue ADMs, including feeling better and  
15 wanting to test whether depression has gone away, ambivalence and uncertainty about the role of ADMs  
16 in recovery, side effects outweighing benefits, questioning whether the self on ADMs is the ‘real self’,  
17 and wanting to assert control over their wellbeing. [7]

18  
19  
20  
21  
22  
23  
24  
25  
26  
27  
28  
29  
30  
31  
32  
33  
34  
35  
36 Research and clinical guidelines suggests that psychological therapies, such as mindfulness-  
37 based cognitive therapy (MBCT) and cognitive-behavioural therapy (CBT), can support recovery from  
38 depression as well as support discontinuing ADMs. [4, 8-10] A significant proportion of people express  
39 a preference for psychological therapies, so they can learn strategies that support recovery without the  
40 need for long-term reliance on ADMs [11]. But psychological therapies can be difficult to access,  
41 involve significant investment of time and energy and are not effective for everyone [12].

42  
43  
44  
45  
46  
47  
48  
49  
50 While studies have examined people’s experiences of ADM and MBCT in recovery, none have  
51 focused primarily on how they operate alongside one another. This study explores how people with a  
52 history of recurrent depression describe their experience of using MBCT and ADM to support their  
53 recovery, drawing on both written feedback booklets and more in depth interviews. It was embedded  
54 within a randomised controlled trial comparing MBCT with support to taper and discontinue ADMs  
55 (henceforth MBCT-TS) and maintenance antidepressants over a two-year period. [13]. These findings

DISCONTINUING ANTIDEPRESSANT MEDICATION

could inform decision-making between GPs and patients about the journey of management and recovery from recurrent depression.

For peer review only

1  
2  
3  
4  
5  
6  
7  
8  
9  
10  
11  
12  
13  
14  
15  
16  
17  
18  
19  
20  
21  
22  
23  
24  
25  
26  
27  
28  
29  
30  
31  
32  
33  
34  
35  
36  
37  
38  
39  
40  
41  
42  
43  
44  
45  
46  
47  
48  
49  
50  
51  
52  
53  
54  
55  
56  
57  
58  
59  
60

## DISCONTINUING ANTIDEPRESSANT MEDICATION

**METHODS****Study context**

This qualitative process evaluation was embedded within the PREVENT trial, a multicentre, single blind, parallel randomised controlled trial, which investigated whether MBCT-TS ( $n = 212$ ) was superior to maintenance ADMs ( $n = 212$ ) for the prevention of depressive relapse or recurrence over 24 months (trial design is described in Kuyken et al.).[13-16] The trial found that MBCT-TS was not superior to maintenance ADM in preventing depressive relapse over two years; however, a subsequent individual patient data meta-analysis which included this data suggests MBCT as an alternative to maintenance ADMs.[8] The South West Research Ethics Committee approved the trial [09/H0206/43], which was registered with the International Standard Randomised Controlled Trial Register [ISRCTN26666654] and the Medicines and Healthcare products Regulatory Agency [2009-012428-10]. We present a Statement Concerning reflexivity in the online supplementary materials, which outlines the experience and background of the authors, to acknowledge our theoretical positions and values in relation to the present study (Supplement 1).[17] We also include the COREQ checklist to match our procedures against standard criteria for qualitative research (Supplement 2).

**Participants**

Participants in the PREVENT trial were recruited from 95 general practices in urban and rural settings in four UK centres, in addition to self-referral.[13] Inclusion criteria were a diagnosis of recurrent major depressive disorder in full or partial remission according to the Diagnostic and Statistical Manual of Mental Disorders-IV;[18] three or more previous major depressive episodes; age 18 years or older; and on a therapeutic dose of maintenance antidepressant drugs in line with the British National Formulary (BNF) and NICE guidance.[4] Exclusion criteria were a current major depressive episode, comorbid diagnoses of current substance misuse; organic brain damage; current or past psychosis, including bipolar disorder; persistent antisocial behaviour; persistent self-injury needing clinical management or therapy; and formal concurrent psychotherapy. All participants gave informed consent before participating in the trial. The full process of recruitment for the PREVENT trial is

## DISCONTINUING ANTIDEPRESSANT MEDICATION

1  
2  
3 described in Kuyken et al.[16]  
4  
5

6 This study examined a sub-group of participants from the PREVENT trial ( $n = 42$ ) allocated to  
7 the MBCT-TS arm of the trial. Of the 212 participants allocated to receive MBCT-TS, 176 received an  
8 adequate dose of treatment (attended four or more group sessions of therapy).[13] The researchers  
9 purposively sampled a sub-group of these participants ( $n = 46$ ) to represent a spread of characteristics  
10 and experiences with respect to: whether they reported their childhood as having higher or lower levels  
11 of abuse, treatment response (relapse/no relapse to a major depressive episode), and ADM  
12 discontinuation profile across the 24 month follow-up period (discontinued ADMs, discontinued ADMs  
13 but subsequently resumed them, tapered ADMs but never fully discontinued, never tapered or  
14 discontinued ADMs).[13] Of the 46 people invited to interview, 42 agreed, which comprised the final  
15 sample. Of the four who declined, two had moved away from the area, one was not interested in  
16 participating and one participant had changed their contact details and could not be reached.  
17 Interviewees did not differ in either baseline characteristics or trial outcomes from the broader study  
18 sample (see Table 1).  
19  
20  
21  
22  
23  
24  
25  
26  
27  
28  
29  
30  
31  
32  
33  
34  
35  
36  
37  
38  
39  
40  
41  
42  
43  
44  
45  
46  
47  
48  
49  
50  
51  
52  
53  
54  
55  
56  
57  
58  
59  
60

## DISCONTINUING ANTIDEPRESSANT MEDICATION

**Table 1.** Characteristics of the sample.

|                                                       | Interviewed<br>(N = 42) | All MBCT-TS Participants<br>(N = 212) |
|-------------------------------------------------------|-------------------------|---------------------------------------|
| <b>Demographic Characteristics</b>                    |                         |                                       |
| Female (%)                                            | 31 (74)                 | 151 (71)                              |
| White (%)                                             | 42 (100)                | 210 (99)                              |
| Age (in years)                                        |                         |                                       |
| <i>M (SD)</i>                                         | 51.88 (10.51)           | 50 (12)                               |
| Range                                                 | 25 – 72                 | 22 – 78                               |
| <b>Psychiatric Characteristics</b>                    |                         |                                       |
| Previous episodes                                     |                         |                                       |
| < 6 episodes                                          | 26 (62)                 | 120 (57)                              |
| ≥ 6 episodes                                          | 16 (38)                 | 92 (43)                               |
| Co-morbid mental health diagnoses                     |                         |                                       |
| 1 or more (%)                                         | 15 (36)                 | 75 (35)                               |
| Treatment preference at Baseline                      |                         |                                       |
| MBCT-TS preference (%)                                | 34 (81)                 | 150 (71)                              |
| ADM preference (%)                                    | 1 (2)                   | 12 (6)                                |
| No preference (%)                                     | 7 (17)                  | 50 (24)                               |
| Treatment outcome                                     |                         |                                       |
| Relapse                                               |                         |                                       |
| <i>n (%)</i> that relapsed during the follow-up phase | 23 (55)                 | 94 (44)                               |
| Antidepressant usage during the follow-up phase       |                         |                                       |
| Stopped and stayed stopped (%)                        | 13 (31)                 | 67 (32)                               |
| Stopped and resumed (%)                               | 9 (21)                  | 57 (27)                               |
| Reduced but never stopped (%)                         | 9 (21)                  | 29 (14)                               |
| Never stopped or reduced (%)                          | 11 (26)                 | 23 (11)                               |
| Residual depression symptoms                          |                         |                                       |
| BDI score at baseline, <i>M (SD)</i>                  | 15.90 (11.35)           | 13.8 (12.4)                           |
| BDI score at 24 month follow-up, <i>M (SD)</i>        | 12.39 (12.25)           | 11.6 (10.9)                           |

Note. BDI = Beck Depression Inventory

## DISCONTINUING ANTIDEPRESSANT MEDICATION

**MBCT-TS intervention**

MBCT-TS comprised MBCT delivered in line with the published treatment manual,[19] but adapted to include a greater focus on developing a relapse/recurrence signature and response plan that explicitly included participants' reduction/discontinuation of ADM (see Kuyken et al.[16] for more detail). The programme involved eight 2¼-hour group sessions, normally over consecutive weeks, with up to four refresher sessions offered in the year following the end of the eight-week programme. Researchers encouraged participants in the MBCT-TS arm to taper and discontinue their maintenance ADMs at several points from the middle of the MBCT-TS course onwards, and provided information to General Practitioners (GPs) and participants about typical tapering/discontinuation regimes and possible withdrawal effects. If participants experienced a relapse/recurrence during the course of the trial, researchers encouraged them to discuss the most appropriate treatment with their GP and made no further requests that they consider tapering/discontinuing their ADMs.

**Qualitative data collection**

We used both written feedback booklets (collected at two time points, soon after MBCT and then at study end) and interviews (at study end) to gather participants' more in depth experiences of recovery. We combined each participant's interview and written feedback booklet data to form a single account of their experiences. This formed the study's data corpus.

**Written feedback booklets**

One month after completing MBCT-TS all trial participants were invited to complete a feedback booklet addressing attitudes towards, and experiences of, taking and reducing antidepressant medication; experiences of taking part in MBCT-TS, and MBCT-TS practices; and the impact of MBCT. In addition to the above, participants received a further feedback booklet 24 months later, which asked the same questions as the first booklet but also included questions focussed on participants' experiences in the follow-up period and basic data on the amount and type of mindfulness practice. The booklets are provided in the online supplementary materials (Supplements 3 & 4).

## DISCONTINUING ANTIDEPRESSANT MEDICATION

**Interviews**

Interviews were semi-structured and normally conducted face-to-face by trained researchers, approximately 24 months after MBCT-TS. They lasted between 45 minutes and one hour and explored experiences during the follow-up period, with questions addressing times of wellness, early signs of potential depressive relapse, and relapses. Questions explored the use and perceived value of mindfulness techniques, use of ADMs, and their combination. We tailored interviews to the specific profile of each participant using a ‘timeline’ prepared in advance and amended by the participant at the interview, which summarised each participant’s ADM use, relapses, and significant life events, as reported to the research team during the trial. The interview schedule was deliberately broad in focus (Supplement 5). Interviews were recorded and transcribed for analysis.

**Public and patient involvement**

The PREVENT trial benefited from the expertise of many people with lived experience of mental health difficulties including a number of members of a locally organised voluntary group called the Lived Experience Group (LEG). The LEG assisted the PREVENT trial at every stage of its development including both the interview schedule and written feedback booklets. There were reviewed and then trialled by several members of the LEG who suggested a number of fundamental changes. A member of the LEG also provided specific training to the research staff on conducting interviews.

**Data Analyses**

We used thematic analysis as our analytic approach.[17] First, we selected eight participants with a range of ADM discontinuation journeys during the trial period: two who had discontinued ADMs and remained ADM-free; two who had discontinued ADMs and subsequently resumed; two who had never tapered or discontinued ADMs; and two who had tapered but never discontinued ADMs. Four researchers (AT, CC, JR and WK) independently analysed the interview transcripts and accompanying one-month and 24-month feedback booklets for each participant. In this phase, we conducted inductive analysis, with each researcher developing a preliminary coding frame. These frames were then

## DISCONTINUING ANTIDEPRESSANT MEDICATION

1  
2  
3 integrated through discussion to remove redundancies and ensure breadth. This collaboratively  
4 produced, inductive coding frame was then combined with deductive codes developed from key  
5 literature on participant experiences of MBCT,[20, 21] and ADM use,[22, 7] to establish a working  
6 coding frame.  
7  
8  
9  
10

11  
12 The lead researcher (AT) then analysed the 42 interviews and accompanying booklets against  
13 this coding frame, using NVivo 11 software. AT, CC, and JR met at regular intervals to discuss  
14 additional emerging codes and arising themes and, if deemed appropriate, integrated these into the  
15 coding frame. Midway through coding, AT sought peer feedback on emerging themes from co-authors,  
16 at an internal research meeting and at a symposium focused on antidepressant tapering at an  
17 international conference (Tickell, 2018). Feedback from these presentations helped clarify which  
18 themes were particularly important, and in particular helped the researchers reflect on those that related  
19 specifically to participants' experiences of ADM alongside MBCT-TS. Once the data were fully coded,  
20 the researchers reviewed the themes in the light of the core research question. These were discussed  
21 with the wider authorship group, whose input was used to reduce redundancy across themes, and  
22 highlight their interactions. Peer review of an earlier version of this manuscript also led to further  
23 refining the questions and themes. Finally, we identified cases that illustrated the unique stories of  
24 recovery and the ways the common themes coalesced in different ways in illustrative case studies.  
25  
26  
27  
28  
29  
30  
31  
32  
33  
34  
35  
36  
37  
38  
39  
40  
41  
42  
43  
44  
45  
46  
47  
48  
49  
50  
51  
52  
53  
54  
55  
56  
57  
58  
59  
60



## DISCONTINUING ANTIDEPRESSANT MEDICATION

## RESULTS

The thematic analysis yielded six over-arching themes, each with a number of constituent sub-themes. We provide a summary (Table 2) and narrative account of each theme and its constituent sub-themes, illustrating these with extracts from participants' accounts. While each person's experience of MBCT and ADMs was unique, these themes converged in complex ways within individual case. Five case examples illustrate these different recovery journeys (Box 1).

**Table 2: Themes and Sub-themes**

| <b>Theme</b>                                  | <b>Sub-themes</b>                                                                                     |
|-----------------------------------------------|-------------------------------------------------------------------------------------------------------|
| <b>Beliefs about the causes of depression</b> | <i>Neurochemical disruption</i><br><i>Learning a psychological model</i><br><i>Integrating models</i> |
| <b>Personal agency</b>                        | <i>Control over depression</i><br><i>Responsibility</i>                                               |
| <b>Acceptance</b>                             | <i>Resolving shame</i><br><i>Self-care</i><br><i>Perspectives on relapse</i>                          |
| <b>Quality of life</b>                        | <i>Experiencing emotions more fully</i><br><i>From coping to enjoying life</i>                        |
| <b>ADM tapering/discontinuation</b>           | <i>Pace of reduction</i><br><i>Managing withdrawal effects</i>                                        |
| <b>Interactions with GP</b>                   | <i>Presence and support</i><br><i>Following advice</i>                                                |

## DISCONTINUING ANTIDEPRESSANT MEDICATION

**Beliefs about the causes and treatment of depression**

This over-arching theme describes participants' beliefs about the causes of depression and how these beliefs influence their treatment decisions. This theme comprises three sub-themes.

## Neurochemical disruption

Many participants described entering the study believing that their recurrent depression was due to a neurochemical disruption in their brain, often citing specifically a deficiency or imbalance of the neurotransmitter serotonin. Participants viewed medication as a way to correct this issue and made parallels to biomedical disorders, viewing ADMs as a *“physiological need”* in the same way that *“diabetics require insulin”* because *“there is some chemical missing.”* (2102; *Written feedback, Never tapered or discontinued*). For instance, Annie explained that she went on ADMs because her doctor told her that she had lower levels of serotonin than other people (see Box 1). This belief appeared to influence expectations about psychological therapy, as some participants stated that they did not understand how *“mindfulness would be able to counteract depression [...] if it's generated by a chemical imbalance.”* (1031, *Interview, Never tapered or discontinued*). Other people said that they had not given much thought to why they were depressed or how ADMs worked: *“Happy pills [...] I've never really given it a great deal of thought exactly what they do to be honest. [...] I just know I don't feel so bad with them.”* (2123, *Interview, Tapered but never discontinued*).

## Learning a psychological model

Participants described how their views on the causes of depression evolved during and following the MBCT-TS programme. Despite some of the initial reservations described above, participants described an open mind as key to engaging with the new psychological model, in which their thoughts, behaviours, and emotions played a role in depressive relapses and recurrences: *“in the first sessions [...] I switched from being highly sceptical to very interested very quickly”* (1203, *Interview, Discontinued*). Some participants articulated a move away from *“treating depression as a disease, like if you had a toothache, so you took pills”*, and were surprised because they *“hadn't thought that there was an alternative”* (1069, *Interview, Discontinued*). They began to feel confident to

## DISCONTINUING ANTIDEPRESSANT MEDICATION

1  
2  
3  
4  
5  
6  
7  
8  
9  
10  
11  
12  
13  
14  
15  
16  
17  
18  
19  
20  
21  
22  
23  
24  
25  
26  
27  
28  
29  
30  
31  
32  
33  
34  
35  
36  
37  
38  
39  
40  
41  
42  
43  
44  
45  
46  
47  
48  
49  
50  
51  
52  
53  
54  
55  
56  
57  
58  
59  
60

discontinue ADMs with the support of psychological therapy. In addition, people described how the programme gave them more awareness of how external factors, such as relationships or financial situations, could trigger or exacerbate depressive relapses and recurrences. On the other hand, some participants found it more difficult to engage in the programme and found themselves “*rebellious against it*” because they did not have “*intellectual confidence in the process.*” (3105; *Written feedback, Never tapered or discontinued*). People described how their initial treatment experiences influenced their attitudes: those who felt that the techniques were helping them to manage depressive relapse/recurrence often endorsed the psychological model. On the other hand, others who experienced deterioration in mood or relapse sometimes reported that they had re-considered bio-medical explanations, and decided to resume or remain on ADMs: “*I really thought depression was a psychosomatic problem, but I am not so sure now. I did give it my best shot, using the mindful techniques, but I still fell into the pit of despair [...] I feel that my depression is caused by a chemical imbalance in my body which, at present, is only helped by taking medication.*” (2200; *Written feedback, Tapered but never discontinued*).

## Integrating models

Although some participants viewed depression as either biomedical or psychological, many did not see the two models as distinct and found ways to integrate them. For instance, they conceptualised that “*antidepressants hold onto the chemical in your body ‘cause you’re not making enough of it yourself*”, while MBCT-TS allows you to “*focus your mind onto how to make your own.*” (1139, *Interview, Never tapered or discontinued*). It seemed that participants who viewed these models as compatible were more open to using ADMs and using psychological techniques as an additional way to support their recovery, rather than viewing them as competing treatments. Furthermore, when participants observed the diversity of other people’s experiences on the programme, some formed the opinion that there are “*all sorts of depressions*” underpinned by different causes “*just as there are colds and flu’s and viruses.*” (3105, *Interview, Never tapered or discontinued*). As such, some reasoned that different people would require different treatment decisions to support recovery: “*My depression is not necessarily the same as other people’s [...] The*

## DISCONTINUING ANTIDEPRESSANT MEDICATION

1  
2  
3 *right combination of changing lifestyle, specific therapies, medication whatever else it takes – that*  
4 *seems to be different for different people.” (3109, Interview, Never tapered or discontinued).*  
5  
6  
7

### 8 **Personal Agency**

9

10  
11 This over-arching theme describes people’s personal agency in their recovery and consequently  
12 their treatment choices. People described entering the study fearful about ADM discontinuation, but  
13 hopeful that a psychological programme could support them. During MBCT-TS, people spoke about  
14 feeling better able to manage their vulnerability to depressive relapse, by using the skills and techniques  
15 they learned on the programme. While these enhanced feelings of personal agency were largely viewed  
16 as a positive and increased many people’s confidence to taper and discontinue ADMs, this was not  
17 always the case. For some having more responsibility to manage their condition created a sense of  
18 unhelpful pressure. This theme comprises two sub-themes.  
19  
20  
21  
22  
23  
24  
25  
26  
27  
28

#### 29 Control over depression

30

31  
32 People described how their treatment choices affected their sense of control over depression. Some felt  
33 that taking ADMs provided a sense of control, as it kept their mood on an even keel. However, this  
34 sense of control was contingent on taking ADMs, so many participants recalled how before the trial  
35 they would not consider discontinuing because they were afraid that depression would return. Through  
36 MBCT, some participants described a change in their sense of personal agency in their recovery,  
37 describing a shift from being a “*helpless victim of circumstance*,” to having more “*control of my*  
38 *feelings and my life*” (1123; *Written feedback, Tapered but never discontinued*). They reported  
39 increased awareness to recognise the early warning signs of depressive relapse and take steps to respond  
40 by applying mindfulness or cognitive-behavioural techniques from a ‘toolbox’, including things like  
41 meditation, activity scheduling, or enlisting social support: “*Before the trial, I didn’t have the tools to*  
42 *recognise what was happening. [...] I didn’t even know I was getting depressed. [Now] if things are*  
43 *difficult I can do something about it.*” (1203, *Interview, Discontinued*). Learning these new skills  
44 reduced many people’s fears about coming off ADMs, because they felt they had the capacity to prevent  
45 or contain depressive relapses. For instance, George said that before the course, he would fall into  
46  
47  
48  
49  
50  
51  
52  
53  
54  
55  
56  
57  
58  
59  
60

## DISCONTINUING ANTIDEPRESSANT MEDICATION

1  
2  
3 depressive episodes very suddenly and without warning, whereas the skills learned in MBCT-TS gave  
4 him more awareness and control to act and prevent relapses before they occurred (see Box 1).  
5  
6  
7

### 8 Responsibility

9

10  
11 Participants also articulated that learning how they could have more agency over their thoughts,  
12 feelings, and behaviours led to an increased sense of responsibility to manage their wellbeing. Most  
13 participants viewed this as positive, especially if they were able to use the techniques to manage  
14 relapse/recurrence. Some people said they preferred MBCT-TS to taking ADMs because it made  
15 recovery feel more like a personal achievement: *“Once I’ve fallen and I realise that I am depressed, I*  
16 *take myself off and say, do 3 or 4 meditations a day. [...] Which to me is better than taking a pill,*  
17 *because I know I’ve worked to get myself well.”* (2016, Interview; Written feedback, Discontinued).  
18  
19  
20  
21  
22  
23  
24  
25  
26

27 However, not all participants viewed having more agency and responsibility over their  
28 wellbeing positively. In particular, some participants described how this made them feel like it was their  
29 fault if they relapsed or felt they had to resume ADMs: *“I feel sad and disappointed that stopping*  
30 *[ADMs] made me feel low again. [...] It makes me feel I’m not right in the head compared to others. I*  
31 *also feel annoyed with myself for not utilising MBCT skills learnt better.”* (2123; Written feedback,  
32 *Discontinued and resumed*). Furthermore, a substantial number of participants expressed the challenge  
33 of finding the time, motivation, or self-discipline to keep up a regular mindfulness practice outside of  
34 the group sessions. Therefore, the sense of control did not always feel stable, as it was contingent on  
35 finding time to practice and *“do it religiously, otherwise I would be fearful of it not being enough.”*  
36 (2102; Written feedback, *Never tapered or discontinued*). Some were disappointed when they realised  
37 that psychological therapy was not an *“all-encompassing cure”* (1222, Interview, *Discontinued and*  
38 *resumed*) and would involve an active and ongoing process of engagement with the techniques learned.  
39  
40  
41  
42  
43  
44  
45  
46  
47  
48  
49  
50  
51  
52

### 53 Acceptance

54

55  
56 This over-arching theme describes people’s feelings of acceptance towards their history of  
57 recurrent depression and ongoing need to manage risk of relapse and recurrence. People reported feeling  
58  
59  
60

## DISCONTINUING ANTIDEPRESSANT MEDICATION

1  
2  
3 a sense of shame around long-term reliance on ADMs before the trial, feeling it labelled them as an ill  
4 person even if feeling well. After the trial, people described an increased sense of acceptance regarding  
5 their vulnerability to depression and an increased motivation to engage in self-care to support their  
6 recovery. This self-management included either ADMs and/or the psychological techniques for  
7 different people. This theme comprises three sub-themes.  
8  
9  
10  
11  
12

## Resolving shame

13  
14  
15  
16  
17  
18 Many participants recalled that before the trial they had felt “*inadequate*” or unable to cope  
19 with life compared to other people because of their recurrent depression treating it as a “*guilty secret*”  
20 (1123; Interview, Tapered but never discontinued). Taking ADMs had helped some people by reducing  
21 the symptoms and allowing them to return to feeling like a “*normal contributing person in society*”  
22 (2200; Interview, Tapered but never discontinued). However, others said that having to take ADMs on  
23 an ongoing basis gave them an underlying feeling that they were still “*not a well person*” (2102;  
24 Interviews, Never tapered or discontinued), even when the symptoms of depression were absent. For  
25 these reasons, some people recalled how before the trial, they found it difficult to name their depression,  
26 and “*couldn’t even or wouldn’t even admit to that*” (1031, Interview, Never tapered or discontinued).  
27  
28 Through MBCT-TS, some participants described how they felt able to name their condition as  
29 depression for the first time. They discussed how meeting other people in the programme had made  
30 them realise that depression was not a negative aspect of their own self-identity, but an aspect of human  
31 experience: “*You realise it is part of the human condition rather than you.*” (1128; Interview, Never  
32 tapered or discontinued), and it “*confirmed that I am a human, worthwhile person*” (2176; Written  
33 feedback, Discontinued and resumed). This led to increased feelings of acceptance towards depression,  
34 because participants experienced a shift away from viewing themselves as abnormal, to seeing  
35 depression as a more acceptable response to life’s difficulties: “*Giving yourself credit [...] ‘cause at*  
36 *the end of the day [...] our human brain is quite a complex thing, isn’t it? [...] There’s nothing wrong*  
37 *in feeling like it.*” (2140; Interview, Discontinued and resumed).  
38  
39  
40  
41  
42  
43  
44  
45  
46  
47  
48  
49  
50  
51  
52  
53  
54  
55  
56  
57  
58  
59  
60

## Self-care

## DISCONTINUING ANTIDEPRESSANT MEDICATION

Participants described how developing more acceptance towards their condition improved their attitudes towards self-care. They said that accepting their vulnerability to depression allowed them to “look at solutions” and that they finally had “consent to actually do something about it” (1031, Interview, Never tapered or discontinued). People described how they increasingly accepted that they needed to take care of themselves, and explained how the programme had taught them legitimate ways to do this, such as using mindfulness practices: “Previously was a mindset [...] that I wasn’t allowed to help myself feel better. [...] Whereas this felt a way that I could do it without mollycoddling myself.” (1031, Interview, Never tapered or discontinued). Participants also described how the programme had reframed self-care not as something “fluffy”, but as “practical” and a necessary part of their ongoing recovery: “It doesn’t make you any less male of course. [Chuckles] Or any less powerful.” (1203, Interview, Discontinued). In some cases, this new attitude towards self-care caused a shift such that people felt more acceptance towards taking ADMs: “I don’t feel any more when I take my pill every morning that there’s something wrong with me” as they recognised it was important to do “everything in my power to help myself.” (1177, Interview, Tapered but never discontinued). Some participants also described how originally, they had taken ADMs unwillingly, whereas after MBCT-TS they decided to take ADMs as an act of effective self-management: “I used to hate taking them [ADM]s I accept [now] it’s all about looking after yourself isn’t it?” (3103; Interview, Discontinued and resumed).

## Perspectives on relapse

One dimension of acceptance was people’s perspectives on mood fluctuations and relapse itself. Some people favoured ADMs as an approach to relapse prevention, because it guaranteed them stability in their mood. For instance, when Greta experienced a deterioration in mood, she interpreted this as a sign that the MBCT-TS programme had been a “failure” and she resumed taking ADMs (see Box 1). However, this was not always the case, and many people described how participating in MBCT-TS changed their attitude towards relapse/recurrence. In particular, some people felt more able to accept mood fluctuations and even periods of depression. They described approaching them in a different way, “thinking it was a phase that one was going through and sort of accepting, okay this is how you’re feeling today” (1159; Interview, Discontinued and resumed). Some people reported that they no longer

## DISCONTINUING ANTIDEPRESSANT MEDICATION

1  
2  
3 wanted to “*blank out their negative emotions*”, and so did not resume ADMs, even if they relapsed:  
4  
5 “*it’s definitely helped me to realise that they [negative emotions] are a part of me as well.*” (4057,  
6  
7 *Interview, Discontinued*).

## 10 **Quality of Life**

11  
12  
13 People reflected on the ways in which treatment choices influenced their quality of life;  
14  
15 specifically, moving them from a place of coping, to a position where they could enjoy and appreciate  
16  
17 their lives. This theme comprises two sub-themes.

### 20 **Experiencing emotions more fully**

21  
22  
23  
24 Upon reflecting on their experiences with ADMs, some participants said that while ADMs  
25  
26 lessened their low mood, at the same time they “*dampen all other emotions*”, for instance, they could  
27  
28 not feel “*blissfully happy, couldn’t get angry, and in hindsight feel I was sedated.*” (4057, *Written*  
29  
30 *feedback, Discontinued*). In the context of depression, some people viewed this numbing effect as  
31  
32 helpful, and reflected that while ADMs “*take away the euphoria that you would get when you’ve done*  
33  
34 *something really, really, really good*”, this was “*a small price to pay really for not having the really*  
35  
36 *dark times.*” (2200; *Interviews, Tapered but never discontinued*). However, many people thought that  
37  
38 this had negatively affected their quality of life, especially in cases where they found it hard to  
39  
40 experience positive emotions. This appeared to influence people’s decision to taper or discontinue  
41  
42 ADMs, because they said that restoring their emotional range was an important part of their long-term  
43  
44 vision of recovery: both George and Claire described this as a key motivator to discontinue their ADMs  
45  
46 (see Box 1). Indeed, people described how their emotional capacity increased after coming off ADMs:  
47  
48 “*I am more alive: my emotions aren’t “levelled out” anymore. I can be happy, sad, angry or calm*  
49  
50 *instead of just bland.*” (4057, *Written feedback, Discontinued*). Despite this, some people found it a bit  
51  
52 of a “*shock*” at first, when faced with “*very extreme emotions and feelings*” again (1212; *Feedback*  
53  
54 *booklets, Discontinued*). Therefore, people found it helpful that the programme taught them techniques  
55  
56 to help manage this transition: “*I definitely used mindfulness during coming off the tablets to [...] be*  
57  
58 *aware what’s going on inside and [...] calm myself down, to have those little islands of tranquillity.*”  
59  
60



## DISCONTINUING ANTIDEPRESSANT MEDICATION

(4057, *Written feedback, Discontinued*). On the other hand, some participants said that despite not tapering or discontinuing ADMs, the programme had helped them to cultivate more positive emotions, and appeared to increase their quality of life on ADMs: *“I suppose the mindfulness in that respect has helped because [...] by slowing yourself down you can [...] capture some of that [...] joy of life that possibly I would have lost.”* (2200; *Interviews, Tapered but never discontinued*).

### From coping to enjoying life

Many people reflected that in their recovery journey they had been grateful for the periods of time where they were simply able to function. However, some participants said that the programme had helped them to move beyond that mind-set, and to develop more wellbeing and appreciate life: *“What has changed? I think my outlook on life, I love life, I really do [...] People said to me [...] before you used to skulk into the room, now you light up the room. [...] I do enjoy life now, where I didn’t before.”* (2016, *Interview, Discontinued*). They valued the fact that the programme had an active focus on positive functioning, and encouraged them to take part in activities that brought happiness and joy into their life. Participants described this as an active process, facilitated by a sense of having more control and autonomy over making positive decisions in their life: *“I rearranged my life so that the things I do now are things that I enjoy and want to do.”* (1203, *Interviews, Discontinued*); *“I am now making bigger future plans to make my life better and introducing new ventures.”* (1031, *Written feedback, Never tapered or discontinued*).

### ADM tapering/discontinuation

The study’s focus included people’s experiences of tapering and discontinuing ADMs in the context of the MBCT-TS programme. This theme describes participants’ views of what helped or hindered the process of discontinuation. It comprises two sub-themes.

#### Timing

Reflecting on the right time to engage with different treatments, many participants felt that ADMs were helpful when they first became depressed: *“they got me out of my initial depression so that*

## DISCONTINUING ANTIDEPRESSANT MEDICATION

1  
2  
3 *I could cope more with just everyday life” (4007, Interview, Never tapered or discontinued).* However,  
4 many did not envisage being on ADMs indefinitely, and they described an increasing need for insight  
5 and self-management of depression as time went on. They thought that the MBCT-TS techniques  
6 required more effort, but supported a longer-term vision of recovery, to “*recognise what makes you*  
7 *depressed and to give you a way to cope with your depression throughout your life for the long-term,*  
8 *and a way that you can come off [ADM].” (4007, Interview, Never reduced or discontinued).* As  
9 illustrated by this quotation, some participants viewed the MBCT-TS skills as part of a longer-term  
10 solution to ADM discontinuation, which extended beyond the two-year follow-up period. Some  
11 participants reflected on how they thought the two treatments could be used in combination to support  
12 people at different parts of their journey, from depression through to recovery: “*I think you need that*  
13 *initial boost of antidepressant to perhaps get you back into a more rational level, and then once you’ve*  
14 *reached that, then bring in the MBCT, until you get back then you know, be weaned off. I can see that*  
15 *working very well really.” (1108, Interview, Never reduced or discontinued).*

16  
17  
18  
19  
20  
21  
22  
23  
24  
25  
26  
27  
28  
29  
30  
31  
32  
33  
34  
35  
36  
37  
38  
39  
40  
41  
42  
43  
44  
45  
46  
47  
48  
49  
50  
51  
52  
53  
54  
55  
56  
57  
58  
59  
60

Participants discussed the pace at which they tapered ADMs, and how they perceived this to have influenced their outcomes. Some people who were worried about coming off ADMs shared that they exercised caution, testing out the psychological techniques for a set period and tapering slowly. They said this was helpful as it gave them time to learn to use the psychological techniques before giving up the support of their ADMs, “*by doing it slowly, you are learning those skills and you are finding out how you can use it. [Then] you can start dropping it [ADM] at your own pace.” (1075; Interviews, Discontinued).* In comparison, those who were keen to come off ADMs and were less fearful of the consequences described tapering more quickly. Although the programme had included explicit guidance to taper gradually, participants’ reports suggested that many people had gone against this advice, and were looking for a “*quick fix*” to “*get off the pills as quick as possible*” (2131, Interview, Tapered but never discontinued). However, upon reflection many people thought, “*perhaps that wasn't the answer perhaps the thing ought to be graded on over a longer period.*” (2131, Interviews, Tapered but never discontinued). Some of these participants reflected that in retrospect they should have been more cautious, and tapering too quickly had led to poorer outcomes: “*I reduced my tablets too quick*

## DISCONTINUING ANTIDEPRESSANT MEDICATION

1  
2  
3 *and paid the price by having to get straight back to the full dose” (2016, Interview; Written feedback,*  
4 *Discontinued).* However, some people, like Claire, who did not successfully discontinue on their first  
5 attempt reported how they had then tried again, tapering more gradually and with more success (see  
6 Box 1).  
7  
8  
9

10  
11  
12 Managing withdrawal effects

13  
14  
15 People said that the programme had helped them to cope with withdrawal effects during and  
16 after tapering/discontinuing ADMs. They described how the group and the meditation techniques  
17 provided ongoing support to manage this period: *“I used meditation techniques [...] tried to treat myself*  
18 *with pleasurable experiences and told myself that this would pass over. [...] I had a network of fellow*  
19 *participants and a trustworthy instructor. All of this put me in a position of confidence that it would*  
20 *work this time.” (4057, Written feedback, Discontinued).* In addition, people said that they were better  
21 able to differentiate the side effects of ADM withdrawal from a depressive relapse. For instance, Mandy  
22 said that in the past, withdrawal effects had been the biggest hindrance to tapering ADMs, because she  
23 had always mistaken them for a depressive relapse and resumed her medication. On the programme,  
24 she learned how to differentiate between these effects and *“real relapses”*, and said that tapering was  
25 relatively *“easy”* this time around (see Box 1). Indeed, some people recalled attempting to discontinue  
26 ADMs before the trial and their withdrawal symptoms being *“misdiagnosed” “as recurring*  
27 *depression,”* whereas this time they *“knew what was coming” (4057, Written feedback, Discontinued).*  
28  
29  
30  
31  
32  
33  
34  
35  
36  
37  
38  
39  
40  
41  
42  
43

44 **Interactions with GP**

45  
46  
47 Participants’ described their interactions with their GPs as being important in their recovery, in  
48 both positive and negative ways. This theme comprises two sub-themes.  
49

50  
51  
52 Presence and support

53  
54  
55 Participants described having a GP who was easy to access throughout the process of  
56 discontinuation as supportive: *“Knowing that I could ring the doctor and say, “I need to make an*  
57 *appointment, I need to come and see you.” There was always that net underneath me to catch me if I*  
58  
59  
60

## DISCONTINUING ANTIDEPRESSANT MEDICATION

1  
2  
3 *was falling and I couldn't stop it.*" (2090, Interview, Discontinued), whereas some participants said they  
4 found it "very difficult" to access their GPs, and so felt "unsupported" (1123, Written feedback,  
5 *Tapered but never discontinued*). Participants reported a more positive attitude to the programme if  
6 their GP had endorsed it, and some said they had only been convinced to take part in the trial because  
7 their GPs said they had themselves done a mindfulness course. When GPs encouraged their patients to  
8 use the mindfulness practices, this appeared to be associated with better engagement and subsequent  
9 success in ADM tapering and discontinuation: "I did reach a stage where I went to see my G.P. as the  
10 depression was returning. [...] We decided that I should try the exercises before trying pills. I did not  
11 need to go back on them yet [...] My GP is a great help." (2090, Written feedback, Discontinued).  
12  
13  
14  
15  
16  
17  
18  
19  
20  
21  
22

## Following advice

23  
24  
25  
26 Participants differed in the extent to which they sought and followed the advice of their GPs.  
27 For instance, some participants described that they remained on their ADMs at their GP's suggestion:  
28 "My GP would not allow me to come off my antidepressant or reduce it because I had been on them so  
29 long term. [I am] relieved but also a bit disappointed." (1108; Written feedback, Never tapered or  
30 discontinued). This adherence to medical advice seemed to be greater for participants who had more  
31 concerns about discontinuation. For instance, Claire, who relapsed the first time that she had attempted  
32 tapering and discontinuation, was much more receptive to her GP's advice the second time around,  
33 because she was afraid of relapsing again (see Box 1). On the other hand, where people were confident  
34 that they had learned the skills to self-manage their depression without ADMs, they more often reported  
35 that they could manage the process independently, and placed less value on their GP's advice: "I went  
36 along to the doctors because I was polite to ask him if I could stop taking it. And he said, "Well yeah  
37 maybe in a few months time you can taper it- ease it off a bit." But really I had decided (laughs) I was  
38 going to stop. So I was just there out of politeness." (1203; Interview, Discontinued).  
39  
40  
41  
42  
43  
44  
45  
46  
47  
48  
49  
50  
51  
52  
53  
54  
55  
56  
57  
58  
59  
60

## DISCONTINUING ANTIDEPRESSANT MEDICATION

**DISCUSSION****Statement of principal findings**

The current study explored the recovery journeys of people with recurrent depression who followed a programme (MBCT-TS), designed to teach psychological skills to prevent depressive relapse whilst providing advice to encourage tapering and discontinuation of maintenance ADMs.[13] Thematic analysis suggested people have unique recovery journeys, but tend to be characterized by six common themes. Five illustrative stories are represented in case studies (Box 1). The over-arching themes in participants' accounts were: beliefs about the causes of depression, personal agency, acceptance, quality of life, ADM tapering/discontinuation and, interactions with GP (Table 2). Together, these findings have the potential to facilitate discussions between clinicians and patients about the depression recovery journey. The findings also provide a starting point for more research into which treatments for recurrent depression, or combination of treatments, work best for whom and when.

**Strengths and weaknesses of the study**

This study had a number of methodological strengths. We had a relatively large sample and purposively sampled the population for whom this research is relevant – people with a history of recurrent depression, stable on maintenance ADMs who were open to both a psychological and pharmacological approach to recovery. The study's time frame enabled participants to reflect on their journey with MBCT-TS and ADMs over two years. To support participants recollection we developed prompts about the course of their depression and ADM use over the two-year period based on information we had collected as part of the parent RCT.

Alongside these strengths, it is important to consider the context within which the study took place and its implications for interpretation of the findings. First, the trial was pragmatic in that it recruited participants from a particular population.[16] However, it did not include people either unwilling to consider a psychological therapy or unwilling to consider tapering/discontinuing their

## DISCONTINUING ANTIDEPRESSANT MEDICATION

1  
2  
3 medication. Second, the parent trial included monitoring participants' use of ADM, and if people  
4 following MBCT-TS were not tapering/discontinuing they were invited to discuss this with their GPs.  
5  
6 Some participants reported feeling pressured to discontinue ADMs and it is reasonable to assume that  
7  
8 some participants may have made different decisions in a more naturalistic setting. Third, our purposive  
9  
10 sampling means this study does not speak to a larger population of people with a history of depression  
11  
12 who are not interested in a psychological approach and tapering/discontinuing their ADMs, or indeed  
13  
14 prefer not to use ADM. Fourth, the questions in our feedback booklets and interviews had a particular  
15  
16 framing, and it is possible that if the questions were framed differently the answers too may have been  
17  
18 different. Finally, for pragmatic reasons we did not ask participants' feedback on the themes as is  
19  
20 sometimes done in qualitative research.  
21  
22  
23  
24

**Implications of our findings**

25  
26  
27  
28 Several randomised controlled trials have demonstrated that psychological therapies such as  
29  
30 CBT and MBCT can support ADM discontinuation,[8-10] but to our knowledge, no qualitative studies  
31  
32 have examined people's experiences of this process. This study adds to the body of literature suggesting  
33  
34 that people's journey involves choices among different treatments, shaped by their prior beliefs,  
35  
36 expectations, experiences and interactions with their GPs. In both MBCT and CBT people learn new  
37  
38 skills to manage depressive symptoms, gaining new perspectives drawn from both the psychological  
39  
40 model and peer-to-peer learning, and develop an increased sense of agency concerning ADM  
41  
42 discontinuation. [11, 20, 21] In this study participants described learning attitudes towards self-care that  
43  
44 were participatory and empowering, which facilitated a sense of agency around ADM use, tapering and  
45  
46 discontinuation. On the other hand, some people's biological beliefs about depression, positive  
47  
48 experiences of ADM, and/or negative experiences of psychological therapies meant they were happy to  
49  
50 use ADM as their primary approach to recovery.  
51  
52  
53

54  
55 People also emphasised the importance of a GP who is accessible and able to provide support  
56  
57 that is collaborative, individualised and empowering, with careful monitoring over time. Moreover,  
58  
59 they described how GPs had powerfully shared their models of depression, expectations of treatment  
60

## DISCONTINUING ANTIDEPRESSANT MEDICATION

1  
2  
3 and treatment choices. The implication for GPs is to provide accessible, collaborative, individualised  
4 and empowering care. Moreover GPs should provide people with explanatory models of depression that  
5 are bio-psycho-social alongside appropriate pharmacological and psychological treatment choices. Our  
6 findings alongside others [21-23] also suggest GPs should not offer an overly simplistic biological  
7 model, e.g., “your serotonin levels are low,” followed by a (repeat) prescription of ADM.  
8  
9  
10  
11  
12  
13  
14

15 ADMs are currently the mainstay treatment approach to recurrent depression. Kendrick has  
16 argued that many people remain on ADMs without clinical need and could benefit from support and  
17 guidance on how to discontinue, especially regarding how to deal with initial withdrawal  
18 symptoms.[23] Our findings underscore this. Moreover, participants spoke of the importance of feeling  
19 that they had acquired alternative skills in MBCT-TS to support their recovery generally by being able  
20 to manage their depression, but also ADM tapering and discontinuation specifically. For example,  
21 where life circumstances were challenging some people felt that the time was not right for them to  
22 discontinue ADMs; they made an informed decision to continue with their medication. Even so, the  
23 majority of participants who remained on ADMs reported that the MBCT-TS treatment had increased  
24 their quality of life on ADMs, and improved their confidence in future discontinuation when  
25 circumstances were more favourable. Our analysis also outlines participants’ views on the appropriate  
26 timing of different treatments, which provide ideas for when it might be an appropriate time to initiate  
27 conversations about ADM and MBCT treatment choices.  
28  
29  
30  
31  
32  
33  
34  
35  
36  
37  
38  
39  
40  
41  
42

43 People described how their expectations of both MBCT and ADM influenced their treatment  
44 choices. Although it is widely assumed that positive expectations predict greater benefit in  
45 psychological therapy, in our sample both unrealistically positive expectations (e.g. expecting MBCT-  
46 TS to be an “*all-encompassing cure-all*”) and very negative expectations (having “*no intellectual*  
47 *confidence in the process*”) appeared to act as a barrier to engagement. These findings are consistent  
48 with those of Malpass et al.[7] and suggest that openly discussing expectations at key junctures is likely  
49 to be key in preventing disappointment or disengagement from what is an effortful process of change.  
50 Likewise, in line with Maund et al.’s findings,[6] people’s causal models of depression also appeared  
51 to influence their expectations and engagement with psychological therapy. Moreover, they were  
52  
53  
54  
55  
56  
57  
58  
59  
60

## DISCONTINUING ANTIDEPRESSANT MEDICATION

1  
2  
3 subject to change during and beyond the therapy process, as their experiences either confirmed or  
4 disconfirmed their expectations and working model of depression and its treatment. People who suffer  
5 from depression frequently endorse biomedical explanations,[24] and this was evident in our sample.  
6  
7 A number of people reported that they derived these models from discussions with their GPs as a  
8 rationale for taking ADMs. Previous research suggests that conceiving depression as a biomedical  
9 illness can absolve people of personal responsibility and thus challenge stereotypes of depression  
10 resulting from personal weakness.[7] However, our findings suggest that strongly held biomedical  
11 beliefs appeared to increase feelings of dependency on ADMs, and contribute to negative expectations  
12 and lack of engagement with psychological therapy. On the other hand, while learning a psychological  
13 model of depression empowered people towards more self-management of depression and feelings of  
14 mastery over their emotional wellbeing, in some cases, when people developed a psychological  
15 understanding and then went on to relapse, they blamed themselves. In some cases, practical life  
16 circumstances also made it very difficult for people to engage in an approach that required time and  
17 effort. Together, this suggests that polarised beliefs about the causes of depression can either  
18 compromise self-efficacy or promote self-blame. Many participants found it helpful to bridge  
19 biomedical and psychological theories, with parallels to a 'biopsychosocial' framework,[25] rather than  
20 viewing separate theories as competing, which seemed to foster more flexibility, self-compassion and  
21 open-mindedness towards trying different treatment options at different times in their journey of  
22 managing recurrent depression. This highlights the importance of recognising that a myriad of factors,  
23 including genetic vulnerability and challenging social circumstances can influence depression.  
24  
25  
26  
27  
28  
29  
30  
31  
32  
33  
34  
35  
36  
37  
38  
39  
40  
41  
42  
43  
44  
45

46 People sometimes describe ADMs as sedating or numbing [26]. In these interviews participants  
47 said this could influence their decision making about ADM use. For example, in the instance of  
48 numbing, some people viewed this as helpful as it reduced their feelings of depression, whereas other  
49 people said that ADMs numbed all of their emotions, including positive feelings, and this contributed  
50 towards a desire to discontinue them. These findings add to ongoing discussion about the psychoactive  
51 effects of ADMs, including their potential benefits and costs, how these effects impact people's  
52  
53  
54  
55  
56  
57  
58  
59  
60



## DISCONTINUING ANTIDEPRESSANT MEDICATION

1  
2  
3 experience of recovery from depression, and how participating in psychological therapy can interact  
4  
5 with these experiences.  
6  
7

8  
9 Finally, descriptions of the role of the GP in supporting ADM discontinuation varied markedly,  
10 and this appeared to result both from differences between patients in their preferred level of guidance  
11 and support, and the availability of their GPs to provide this. For example, some people adhered to their  
12 GP's advice although this was in conflict with their own desired approach, some described informing  
13 their GP of their intentions as an act of courtesy, and some did not involve their GP at all. In some of  
14 these latter cases, participants felt that they would have benefited from more support, but their GP, for  
15 a range of reasons, was unable to provide this. People also described needing more understanding and  
16 support over time as they took more responsibility for managing their depression. This is in line with  
17 findings from Malpass et al.,[7] who suggested that people vary in the extent to which they want to be  
18 involved in treatment decision-making, and their preferences for involvement are dynamic, not static.  
19 Archer has described different 'modes of reflexivity' noting the varying degrees to which people act  
20 autonomously or rely on endorsement from others.[27] Moreover, recovery meant different things to  
21 different people, and overall, the outcome most important to patients appeared to be their day-to-day  
22 functioning and quality of life. It is likely that when GPs able to recognise their patients' preferred mode  
23 of engagement, and complex, dynamic views of recovery and adapt their approach accordingly, this  
24 will facilitate patient-GP consultations about ADM and psychological therapies treatment choices.  
25  
26  
27  
28  
29  
30  
31  
32  
33  
34  
35  
36  
37  
38  
39  
40  
41  
42

### 43 **Unanswered questions and future research**

44  
45  
46 This work adds to the emerging literature on people's experiences of recovery from depression  
47 with ADM and psychological therapies. Applied research asking how patients and health  
48 professionals communicate about their respective models of depression, and understand the how this  
49 affects treatment decisions, compliance, outcomes and a broader conceptualization of recovery would  
50 be valuable. Extending this to the broader population of people who suffer depression would not only  
51 provide an interesting and important alternate perspective, buy also be important to consider with  
52 respect to recovery journeys and treatment choices.  
53  
54  
55  
56  
57  
58  
59  
60

## DISCONTINUING ANTIDEPRESSANT MEDICATION

1  
2  
3 Our work took a qualitative approach. An obvious next question asks how these process  
4 variables affect outcomes. That is to say, what works for who, how, when, to affect treatment  
5 outcomes? Finally, such research should prioritise the outcome that is most meaningful to patients:  
6 their day-to-day functioning and quality of life.  
7  
8  
9  
10  
11  
12  
13  
14  
15  
16  
17  
18  
19  
20  
21  
22  
23  
24  
25  
26  
27  
28  
29  
30  
31  
32  
33  
34  
35  
36  
37  
38  
39  
40  
41  
42  
43  
44  
45  
46  
47  
48  
49  
50  
51  
52  
53  
54  
55  
56  
57  
58  
59  
60

For peer review only

## DISCONTINUING ANTIDEPRESSANT MEDICATION

## REFERENCES

1. Kessler R C & Bromet E J. The Epidemiology of Depression Across Cultures. *Annu Rev Public Health* 2013;34:119–38. <https://doi.org/10.1146/annurev-publhealth-031912-114409>
2. GBD 2017 Disease and Injury Incidence and Prevalence Collaborators. Global, regional, and national incidence, prevalence, and years lived with disability for 354 diseases and injuries for 195 countries and territories, 1990–2017: a systematic analysis for the Global Burden of Disease Study 2017. *Lancet* 2018;392(10159):1789-1858. [https://doi.org/10.1016/S0140-6736\(18\)32279-7](https://doi.org/10.1016/S0140-6736(18)32279-7)
3. Kruijshaar M E, Barendregt J, Vos T, et al. Lifetime prevalence estimates of major depression: An indirect estimation method and a quantification of recall bias. *Eur J Epidemiol* 2005;20(1):103–111. <https://doi.org/10.1007/s10654-004-1009-0>
4. National Institute of Health and Care Excellence (NICE). *Depression: The treatment and management of depression in adults (update)*. London: Author 2009. <https://www.nice.org.uk/guidance/cg90> (accessed 18 May 2019).
5. Bosman R, Huijbregts K, Verhaak P, et al. Long-term antidepressant use: a qualitative study on perspectives of patients and GPs in primary care. *Br J Gen Pract* 2016;66(651):e708-e719. <https://doi.org/10.3399/bjgp16X686641>
6. Maund E, Dewar-Haggarta R, Williams S, et al. Barriers and facilitators to discontinuing antidepressant use: A systematic review and thematic synthesis. *J Affect Disord* 2019;245:38-62. <https://doi.org/10.1016/j.jad.2018.10.107>
7. Malpass A, Shawa A, Sharp D, et al. “Medication career” or “Moral career”? The two sides of managing antidepressants: A meta-ethnography of patients’ experience of antidepressants. *Soc Sci Med* 2009;68:154-168. <https://doi.org/10.1016/j.socscimed.2008.09.068>
8. Kuyken W, Warren F C, Taylor R S, et al. Efficacy of mindfulness-based cognitive therapy in prevention of depressive relapse: An individual patient data meta-analysis from randomized trials. *JAMA Psychiatry* 2016;73(6):565–574. <https://doi.org/10.1001/jamapsychiatry.2016.0076>
9. Maund E, Stuart B, Moore M, et al. Managing antidepressant discontinuation: a systematic review. *Ann Fam Med* 2019;17:52-60. <https://doi.org/10.1370/afm.2336>
10. Bockting C, Klein N, Elgersma H, et al. Effectiveness of preventive cognitive therapy while tapering antidepressants versus maintenance antidepressant treatment versus their combination in prevention of depressive relapse or recurrence (DRD study): a three-group, multicentre, randomised controlled trial. *Lancet Psychiatry* 2018;5(5):401-410. [https://doi.org/10.1016/S2215-0366\(18\)30100-7](https://doi.org/10.1016/S2215-0366(18)30100-7)
11. Cuijpers P, Quero S, Dowrick C, et al. Psychological Treatment of Depression in Primary Care: Recent Developments. *Cur Psychiatry Rep* 2019; 21:129. <https://doi.org/10.1007/s11920-019-1117-x>
12. Bockting C, Hollon S, Jarrett R, et al. A lifetime approach to major depressive disorder: The contributions of psychological interventions in preventing relapse and recurrence. *Clin Psychol Rev* 2015;41:16-26. <https://doi.org/10.1016/j.cpr.2015.02.003>
13. Kuyken W, Hayes R, Barrett B, et al. Effectiveness and cost-effectiveness of mindfulness-based cognitive therapy compared with maintenance antidepressant treatment in the prevention of depressive relapse or recurrence (PREVENT): A randomised controlled trial. *Lancet* 2015;386(9988):63–73. [https://doi.org/10.1016/S0140-6736\(14\)62222-4](https://doi.org/10.1016/S0140-6736(14)62222-4)
14. Kuyken W, Byford S, Byng R, et al. Study protocol for a randomised controlled trial comparing mindfulness-based cognitive therapy with maintenance anti-depressant treatment in the prevention of depressive relapse/recurrence: the PREVENT trial. *Trials* 2010;11(99):1-10. <https://doi.org/10.1186/1745-6215-11-99>
15. Kuyken W, Byford S, Byng R, et al. Update to the study protocol for a randomized controlled trial comparing mindfulness-based cognitive therapy with maintenance anti-depressant

## DISCONTINUING ANTIDEPRESSANT MEDICATION

- 1  
2  
3 treatment depressive relapse/recurrence: the PREVENT trial. *Trials* 2014;15(1).  
4 <https://doi.org/10.1186/1745-6215-15-217>
- 5  
6 16. Kuyken W, Hayes R, Barrett B, et al. The effectiveness and cost-effectiveness of  
7 mindfulness-based cognitive therapy compared with maintenance antidepressant treatment in  
8 the prevention of depressive relapse/recurrence: results of a randomised controlled trial (the  
9 PREVENT study). *Health Technol Assess* 2015;19(73):1-124.  
10 <https://doi.org/10.3310/hta19730>
- 11  
12 17. Braun V & Clarke V. Using thematic analysis in psychology. *Qual Res Psychol* 2006;3(2):77-  
13 101. <http://dx.doi.org/10.1191/1478088706qp063oa>
- 14  
15 18. American Psychiatric Association. *Diagnostic and statistical*  
16 *manual of mental disorders* (4th ed., text rev.). Washington, DC: Author 2000.
- 17  
18 19. Segal Z V, Williams J M G, & Teasdale J D. *Mindfulness- based cognitive therapy for*  
19 *depression: A new approach to preventing relapse*. New York: Guilford Press 2002.
- 20  
21 20. Allen M, Bromley A, Kuyken W, et al. Participants' experiences of mindfulness-based  
22 cognitive therapy: "It changed me in just about every way possible". *Behav Cogn Psychother*  
23 2009;37:413-430. <https://doi.org/10.1017/S135246580999004X>
- 24  
25 21. Malpass A, Carel H, Ridd M, et al. Transforming the perceptual situation: a meta-  
26 ethnography of qualitative work reporting patients' experiences of mindfulness-based  
27 approaches. *Mindfulness* 2012;3:60-75. <https://doi.org/10.1007/s12671-011-0081-2>
- 28  
29 22. Ridge D, Kokanovic R, Broom A, et al. My dirty little secret: Patient constructions of anti-  
30 depressant use and the crisis of legitimacy. *Soc Sci Med* 2015;146:53-61.  
31 <http://dx.doi.org/10.1016/j.socscimed.2015.10.012> 0277-9536
- 32  
33 23. Kendrick, A. Reviewing long-term anti-depressant use by careful monitoring in everyday  
34 practice (REDUCE) programme. 2016  
35 [https://europepmc.org/grantfinder/grantdetails?query=pi:%22Kendrick+A%22+gid:%22RP-](https://europepmc.org/grantfinder/grantdetails?query=pi:%22Kendrick+A%22+gid:%22RP-PG-1214-20004%22+ga:%22DH/NIHR%22)  
36 [PG-1214-20004%22+ga:%22DH/NIHR%22](https://europepmc.org/grantfinder/grantdetails?query=pi:%22Kendrick+A%22+gid:%22RP-PG-1214-20004%22+ga:%22DH/NIHR%22) (accessed 18 May 2019).
- 37  
38 24. Kuyken W, Brewin C R, Power M J, et al. Causal beliefs about depression in depressed  
39 patients, clinical psychologists and lay persons. *Br J Med Psychol* 1992;65:257-268.  
40 <https://doi.org/10.1111/j.2044-8341.1992.tb01706.x>
- 41  
42 25. Engel G. The need for a new medical model: A challenge for biomedical science. *Science*  
43 1977;196(4286):126-9. Retrieved from: <https://www.jstor.org/stable/1743658>
- 44  
45 26. Moncrieff J, Cohen D, & Porter S. The Psychoactive Effects of Psychiatric Medication: The  
46 Elephant in the Room. *J Psychoactive Drugs* 2013;45(5):409-415.  
47 <http://doi.org/10.1080/02791072.2013.845328>
- 48  
49 27. Archer M. S. Routine, reflexivity, and realism. *Sociol Theory* 2010;28(3):272-303.  
50 <https://doi.org/10.1111/j.1467-9558.2010.01375.x>  
51  
52  
53  
54  
55  
56  
57  
58  
59  
60

## DISCONTINUING ANTIDEPRESSANT MEDICATION

## BOX 1: CASE EXAMPLES

1  
2  
3  
4  
5  
6  
7 **Mandy.** *Mandy, aged 57, experienced nine episodes of depression, beginning when she was 32.*

8  
9 *Following the MBCT-TS course Mandy successfully discontinued her ADM treatment. She did not*  
10 *experience a relapse over the 24-month follow-up period.*

11  
12  
13  
14 Mandy recalled how ADMs had helped her to function well. In the past, she had tried tapering, but  
15 had always relapsed, so assumed that ADMs would be a part of her life forever. At first, Mandy was  
16 nervous, but was willing to try tapering ADMs gradually and with the support of MBCT-TS  
17  
18 **(Personal Agency: Control Over Depression).** Mandy's GP was supportive, but reassured her that it  
19 was ultimately her decision **(Interactions with GP: Presence and Support).** During the MBCT-TS  
20 course, Mandy said that she learned a different model of depression and developed a better  
21 understanding of "how the mind works" **(Beliefs about the Causes of Depression: Learning a**  
22 **Psychological Model).** She felt more confident about tapering, and said that this time it was "so easy,  
23 knowing that I have been given tools to help me through it if needed", and found the course "totally  
24 liberating" as it gave her the chance to take control of her depression, rather than the other way round  
25  
26 **(Personal Agency: Responsibility).** She also found it helpful to learn about the possible symptoms of  
27 withdrawal, which included mood swings. Mandy realised that the relapses she had experienced when  
28 she had tried to taper her ADMs in the past might have been withdrawal symptoms, as opposed to  
29 "real relapses" **(ADM Tapering / Discontinuation: Managing Withdrawal Effects).** At the time of  
30 interview, having discontinued ADMs, Mandy still practised what she learned in MBCT-TS and made  
31 it part of her daily routine. She accepted that if she ever relapsed, she could use ADMs, but it would  
32 only ever be a short-term solution, because she has the MBCT-TS skills as a "weapon" to help her  
33 manage **(Acceptance: Self-Care).**

34  
35  
36  
37  
38  
39  
40  
41  
42  
43  
44  
45  
46  
47  
48  
49  
50  
51  
52  
53 **Greta.** *Greta, aged 72, had experienced three episodes of depression, beginning when she was 33.*

54  
55 *Following the MBCT-TS course she discontinued her ADMs but then resumed following a*  
56 *deterioration in mood.*  
57  
58  
59  
60

## DISCONTINUING ANTIDEPRESSANT MEDICATION

1  
2  
3 Greta was very optimistic about the course because she hated being on ADMs, which gave her  
4 unpleasant side effects that interfered with her quality of life (**Personal Agency: Control over**  
5 **Depression**). At first, Greta said the course made an “*immense difference*” to her, and she described  
6 learning how to combat the negative thoughts and feelings she was having (**Beliefs about the Causes**  
7 **of Depression: Learning a Psychological Model**). The programme left Greta feeling “*so well and*  
8 *positive*” that she decided to taper her ADMs very quickly (**ADM Tapering/Discontinuation: Pace of**  
9 **Reduction**), but began to feel her mood dipping. Greta thought this must be a sign that the programme  
10 was not working, because she should not feel depressed (**Acceptance: Perspectives on Relapse**). Greta  
11 went to her GP, who did not seem interested in the programme and told her to resume ADMs  
12 immediately (**Interactions with GP: Presence and Support**). She was disappointed and felt “*guilty*”  
13 that she was not able to use these new skills to keep herself well (**Personal Agency: Responsibility**).  
14 She stopped practising mindfulness, although the programme made her remember to appreciate the high  
15 points in her day and experience more joy (**Quality of Life: From Coping to Enjoying Life**).

16  
17  
18 **Annie.** *Annie, aged 48, had experienced five episodes of depression, beginning when she was 23.*  
19 *Following the MBCT-TS programme, she discontinued her ADMs but then resumed them later.*

20  
21  
22  
23  
24  
25  
26  
27  
28  
29  
30  
31  
32  
33  
34  
35  
36  
37  
38  
39  
40  
41  
42  
43  
44  
45  
46  
47  
48  
49  
50  
51  
52  
53  
54  
55  
56  
57  
58  
59  
60  
Annie felt that ADMs had a positive impact on her life, allowing her to cope day-to-day as a full-time  
carer for her husband who had a disability. At first, she was very reluctant to try discontinuing ADMs  
because she believed she might have low levels of serotonin (**Beliefs about the Causes of Depression:**  
**Neurochemical Disruption**). However, the programme taught her a new model of understanding  
depression (**Beliefs about the Causes of Depression: Learning a Psychological Model**), which made  
her feel empowered to practice the psychological techniques (**Personal Agency: Responsibility**). She  
started to taper off ADMs, but then her mother died and her husband’s health deteriorated, so it was  
difficult to find time to practice mindfulness. Her GP advised her it was probably not a good time to  
discontinue (**Interactions with GP: Presence and Support**), so she resumed ADMs. However, Annie  
still incorporated the mindfulness exercises into her everyday life, which brought her more joy (**Quality**  
**of Life: Experiencing Emotions More Fully**). She also recognised that it is not her fault when she felt  
depressed, given how challenging her life was (**Acceptance: Resolving Shame**). Annie felt that the

## DISCONTINUING ANTIDEPRESSANT MEDICATION

1  
2  
3 best way to manage her depression was to combine ADMs with mindfulness practices, which gave her  
4 more skills to look after herself during difficult times (**Acceptance: Self-Care**). She felt hopeful that  
5 one day she would discontinue ADMs, when her life circumstances were more stable.  
6  
7  
8

9  
10 **George.** *George, aged 37, had experienced ten episodes of depression, beginning when he was 16.*  
11 *Following the MBCT-TS programme he discontinued his ADMs. He experienced a relapse to*  
12 *depression during the 24-month follow-up.*  
13  
14  
15  
16

17 George was very optimistic about trying an alternative to ADMs, because they made him feel like a  
18 “zombie”. Having experienced substance misuse issues in the past George had the goal of being totally  
19 “chemical free”. Before the course, George felt he had no control over his depression symptoms, and  
20 his mood would deteriorate suddenly without warning (**Personal Agency: Control**). Through  
21 practising the mindfulness skills, he described developing more awareness of his emotions and felt he  
22 would have the skills to manage them (**Personal Agency: Responsibility**). George said that the best  
23 part of taking part in MBCT-TS was meeting other people with depression, which made him feel more  
24 accepting of himself (**Acceptance: Resolving Shame**). He felt that ADMs had masked his symptoms,  
25 whereas MBCT-TS allowed him to explore the problems in his life that were contributing to depression  
26 and work through them to make long-term changes (**Personal Agency: Responsibility**). When George  
27 relapsed shortly after discontinuing ADMs, he carried on practising MBCT-TS and said that the skills  
28 he learned were enough to pull him out of that period of low mood (**Acceptance: Perspectives on**  
29 **Relapse**).  
30  
31  
32  
33  
34  
35  
36  
37  
38  
39  
40  
41  
42  
43  
44

45 **Claire.** *Claire, aged 49, had experienced four episodes of depression, beginning when she was 17.*  
46 *Following the MBCT-TS programme, Claire discontinued her ADMs. She relapsed and resumed*  
47 *medication, but subsequently tapered and discontinued again, and was not using ADMs at the time of*  
48 *her follow-up interview.*  
49  
50  
51  
52  
53

54 At first, Claire was very sceptical about the MBCT-TS programme and thought it might all be “*numbo*  
55 *jumbo*”. However, she was very keen to come off ADMs, so she approached the programme with an  
56 open mind and wanted to give it her all (**Personal Agency: Control**). As the course progressed, Claire  
57  
58  
59  
60

## DISCONTINUING ANTIDEPRESSANT MEDICATION

1  
2  
3 changed her mind and began to *“believe more and more that this might help me”*. MBCT-TS gave her  
4  
5 new ways to cope with her feelings, which shocked her because she *“had never took control of my*  
6  
7 *depression before”* (**Personal Agency: Responsibility**). She became very excited and tapered off her  
8  
9 medication *“too quickly”* and *“hit a brick wall in a short amount of time. Went straight back in to a*  
10  
11 *deep depression”* (**ADM Tapering/Discontinuation: Pace of Reduction**). Her doctor was very  
12  
13 understanding, and did not push her to do anything, but advised her to go back on ADMs and try to  
14  
15 taper off again when she was feeling better (**Interactions with GP: Presence and Support**). He said  
16  
17 that she should try tapering them more slowly next time even though she *“wanted to get off them as*  
18  
19 *soon as possible”*. This time, she did *“exactly as she was told”* and did not experience a relapse  
20  
21 (**Interactions with GP: Following Advice**). Claire was very pleased because she said they had always  
22  
23 felt that ADMs had *“suppressed”* her and that the person she was when taking ADMs *“wasn’t really*  
24  
25 *me”* (**Quality of Life: Experiencing Emotions More Fully**).  
26  
27  
28  
29  
30  
31  
32  
33  
34  
35  
36  
37  
38  
39  
40  
41  
42  
43  
44  
45  
46  
47  
48  
49  
50  
51  
52  
53  
54  
55  
56  
57  
58  
59  
60



## Statement Concerning Reflexivity

Interviews were conducted by members of the PREVENT trial research team (see Kuyken et al., 2015), following training and using a standard protocol and semi-structured interview schedule. Both male and female interviewers gathered data. Interviewers had knowledge of the participants' treatment journeys prior to conducting their 24-month interviews (from reviewing their files and in some cases as a result of their involvement in earlier waves of data collection). The protocol included interviewers familiarizing themselves with any information about treatment experiences and trajectories of participants, which were held in study records, as part of the interview preparation process. Researchers did not know participants prior to their entry to the trial, and had no association with them outside the context of the trial and associated research assessments.

All/Some interviewers had undertaken mindfulness training, acting as participant observers in MBCT courses, or in other contexts. This personal knowledge enabled them to understand the nuances in participants' descriptions of their experiences, for example participants' references to particular mindfulness practices or exercises, and to respond with confidence. Some interviewers had positive personal experiences of mindfulness whereas others held more neutral attitudes. None were aware of the main trial outcomes at the time the interviews were conducted and all were encouraged to adopt an open minded and curious attitude, with no preconceptions about whether MBCT-TS had, or had not, supported participants in their treatment journeys. Despite this, it should be acknowledged that some interviewers may have held implicit biases or expectations regarding treatment effects. Likewise, participants understood the association of interviewers with the primary trial. Thus whilst participants were encouraged to speak freely and honestly about their experiences, it is possible that their responses were influenced by the perceived allegiance of the researchers to

1  
2  
3 the intervention being explored, and that they may have felt a sense of obligation to make  
4  
5 positive comments about MBCT-TS.  
6

7  
8 The researchers conducting data analysis, AT (BA Hons, Postgraduate Research  
9  
10 Assistant) and CC (DPhil, Senior Research Fellow), although not involved in the PREVENT  
11  
12 trial, had a knowledge of the programme under investigation. AT has undertaken mindfulness  
13  
14 training in other contexts, and is familiar with the MBCT curriculum. CC has significant  
15  
16 prior experience as a participant-observer in MBCT classes for people with recurrent  
17  
18 depression. JR (DPhil, Lecturer) is an experienced qualitative researcher who has theoretical  
19  
20 knowledge of mindfulness-based approaches. AT, CC and JR have all worked previously on  
21  
22 studies exploring mindfulness-based programmes in different contexts and AT and CC were  
23  
24 employed on a research grant exploring the effectiveness of mindfulness-based programmes  
25  
26 at the time this work was conducted. AT, CC, and JR were aware of the main outcomes of the  
27  
28 PREVENT trial (no superiority of MBCT-TS over maintenance antidepressants) at the time  
29  
30 the qualitative analysis commenced, and approached the data with an assumption of overall  
31  
32 equipoise between the two approaches, that was nevertheless likely to concealed marked  
33  
34 individual differences in response. WK (PhD, DClInPsy) was the Principal Investigator on  
35  
36 the PREVENT trial and is a mindfulness trainer and practitioner. He was not involved in  
37  
38 directly teaching mindfulness to any of the participants in the PREVENT trial, but did  
39  
40 supervise the mindfulness teachers who taught the MBCT-TS trial classes. He had no  
41  
42 personal knowledge of the individual participants and their treatment journeys.  
43  
44  
45  
46  
47  
48  
49  
50  
51  
52  
53  
54  
55  
56  
57  
58  
59  
60

## Consolidated criteria for reporting qualitative studies (COREQ): 32-item checklist

| No                                             | Item                    | Guide questions/description                                 | Responses and reference in manuscript if appropriate                                   |
|------------------------------------------------|-------------------------|-------------------------------------------------------------|----------------------------------------------------------------------------------------|
| <b>Domain 1: Research team and reflexivity</b> |                         |                                                             |                                                                                        |
| Personal Characteristics                       |                         |                                                             |                                                                                        |
| 1.                                             | Interviewer/facilitator | Which author/s conducted the interview or focus group?      | Contributor statement                                                                  |
| 2.                                             | Credentials             | What were the researcher's credentials? <i>E.g. PhD, MD</i> | AT, BSc; RB, MD; CC, PhD; FG, PhD; RH PhD; JC DClinPsy; AW DClinPsy; NM, PhD; WK, PhD. |
| 3.                                             | Occupation              | What was their occupation at the time of the study?         | All researchers. Title page, affiliation.                                              |

1  
2  
3  
4  
5  
6  
7  
8  
9  
10  
11  
12  
13  
14  
15  
16  
17  
18  
19  
20  
21  
22  
23  
24  
25  
26  
27  
28  
29  
30  
31  
32  
33  
34  
35  
36  
37  
38  
39  
40  
41  
42  
43  
44  
45  
46

| No | Item                    | Guide questions/description                          | Responses and reference in manuscript if appropriate                                                                                                                                                              |
|----|-------------------------|------------------------------------------------------|-------------------------------------------------------------------------------------------------------------------------------------------------------------------------------------------------------------------|
| 4. | Gender                  | Was the researcher male or female?                   | Female, AT, CC, RH, JC, AW, NM; Male RB, FG, WK.                                                                                                                                                                  |
| 5. | Experience and training | What experience or training did the researcher have? | Lead authors all had extensive research training, interviewers had interview training and RB, FG, NM and WK all had qualitative methods experience and training. See Methods and Statement Concerning Reflexivity |

| No                             | Item                                     | Guide questions/description                                                                                                                      | Responses and reference in manuscript if appropriate                                                |
|--------------------------------|------------------------------------------|--------------------------------------------------------------------------------------------------------------------------------------------------|-----------------------------------------------------------------------------------------------------|
| Relationship with participants |                                          |                                                                                                                                                  |                                                                                                     |
| 6.                             | Relationship established                 | Was a relationship established prior to study commencement?                                                                                      | Yes. Manuscript Pages 12-13 and Statement Concerning Reflexivity                                    |
| 7.                             | Participant knowledge of the interviewer | What did the participants know about the researcher? <i>e.g. personal goals, reasons for doing the research</i>                                  | Their role in the larger parent trial. See Interview Schedule and Statement Concerning Reflexivity. |
| 8.                             | Interviewer characteristics              | What characteristics were reported about the interviewer/facilitator? <i>e.g. Bias, assumptions, reasons and interests in the research topic</i> | See Interview Schedule and Statement                                                                |

1  
2  
3  
4  
5  
6  
7  
8  
9  
10  
11  
12  
13  
14  
15  
16  
17  
18  
19  
20  
21  
22  
23  
24  
25  
26  
27  
28  
29  
30  
31  
32  
33  
34  
35  
36  
37  
38  
39  
40  
41  
42  
43  
44  
45  
46

| No                            | Item                                  | Guide questions/description                                                                                                                                     | Responses and reference in manuscript if appropriate                        |
|-------------------------------|---------------------------------------|-----------------------------------------------------------------------------------------------------------------------------------------------------------------|-----------------------------------------------------------------------------|
|                               |                                       |                                                                                                                                                                 | Concerning Reflexivity.                                                     |
| <b>Domain 2: study design</b> |                                       |                                                                                                                                                                 |                                                                             |
| Theoretical framework         |                                       |                                                                                                                                                                 |                                                                             |
| 9.                            | Methodological orientation and Theory | What methodological orientation was stated to underpin the study? <i>e.g. grounded theory, discourse analysis, ethnography, phenomenology, content analysis</i> | Thematic analysis and case studies. Manuscript, Data Analysis) Pages 13-14) |
| Participant selection         |                                       |                                                                                                                                                                 |                                                                             |
| 10.                           | Sampling                              | How were participants selected? <i>e.g. purposive, convenience, consecutive, snowball</i>                                                                       | Purposive, see Manuscript, Methods, Participants, Pages 9-11.               |

| No      | Item                       | Guide questions/description                                                        | Responses and reference in manuscript if appropriate                 |
|---------|----------------------------|------------------------------------------------------------------------------------|----------------------------------------------------------------------|
| 11.     | Method of approach         | How were participants approached? <i>e.g. face-to-face, telephone, mail, email</i> | See Manuscript, Study Context and Participants, Pages 9-11.          |
| 12.     | Sample size                | How many participants were in the study?                                           | See Manuscript, Study Context and Participants, Pages 9-11.          |
| 13.     | Non-participation          | How many people refused to participate or dropped out? Reasons?                    | See Manuscript, Study Context and Participants, Pages 9-11.          |
| Setting |                            |                                                                                    |                                                                      |
| 14.     | Setting of data collection | Where was the data collected? <i>e.g. home, clinic, workplace</i>                  | See Manuscript, Study Methods, Pages 9-13 as well as published Study |

1  
2  
3  
4  
5  
6  
7  
8  
9  
10  
11  
12  
13  
14  
15  
16  
17  
18  
19  
20  
21  
22  
23  
24  
25  
26  
27  
28  
29  
30  
31  
32  
33  
34  
35  
36  
37  
38  
39  
40  
41  
42  
43  
44  
45  
46

| No              | Item                         | Guide questions/description                                                              | Responses and reference in manuscript if appropriate                                                                                   |
|-----------------|------------------------------|------------------------------------------------------------------------------------------|----------------------------------------------------------------------------------------------------------------------------------------|
|                 |                              |                                                                                          | Protocol and parent Trial.                                                                                                             |
| 15.             | Presence of non-participants | Was anyone else present besides the participants and researchers?                        | No                                                                                                                                     |
| 16.             | Description of sample        | What are the important characteristics of the sample? <i>e.g. demographic data, date</i> | See Manuscript, Study Context and Participants, Pages 9-11.                                                                            |
| Data collection |                              |                                                                                          |                                                                                                                                        |
|                 |                              |                                                                                          | See Manuscript, Study Methods, Qualitative Data Collection pages 12-13, as well as the Supplementary Materials which includes both the |
| 17.             | Interview guide              | Were questions, prompts, guides provided by the authors? Was it pilot tested?            |                                                                                                                                        |



| No  | Item                   | Guide questions/description                                             | Responses and reference in manuscript if appropriate |
|-----|------------------------|-------------------------------------------------------------------------|------------------------------------------------------|
|     |                        |                                                                         | Feedback<br>Booklets and<br>interview<br>Schedules.  |
| 18. | Repeat interviews      | Were repeat interviews carried out? If yes, how many?                   | No                                                   |
| 19. | Audio/visual recording | Did the research use audio or visual recording to collect the data?     | See Manuscript, Study Methods page 13                |
| 20. | Field notes            | Were field notes made during and/or after the interview or focus group? | No                                                   |
| 21. | Duration               | What was the duration of the interviews or focus group?                 | See Manuscript, Study Methods, Interviews, page 13   |
| 22. | Data saturation        | Was data saturation discussed?                                          | Yes, see Study Protocol                              |

| No                                     | Item                           | Guide questions/description                                              | Responses and reference in manuscript if appropriate |
|----------------------------------------|--------------------------------|--------------------------------------------------------------------------|------------------------------------------------------|
| 23.                                    | Transcripts returned           | Were transcripts returned to participants for comment and/or correction? | No                                                   |
| <b>Domain 3: analysis and findings</b> |                                |                                                                          |                                                      |
| Data analysis                          |                                |                                                                          |                                                      |
| 24.                                    | Number of data coders          | How many data coders coded the data?                                     | See Manuscript, Data Analysis, pages 13-14           |
| 25.                                    | Description of the coding tree | Did authors provide a description of the coding tree?                    | See Manuscript, Data Analysis, pages 13-14           |
| 26.                                    | Derivation of themes           | Were themes identified in advance or derived from the data?              | See Manuscript, Data Analysis, pages 13-14           |

| No        | Item                         | Guide questions/description                                                                                                              | Responses and reference in manuscript if appropriate         |
|-----------|------------------------------|------------------------------------------------------------------------------------------------------------------------------------------|--------------------------------------------------------------|
| 27.       | Software                     | What software, if applicable, was used to manage the data?                                                                               | See Manuscript, Data Analysis, pages 13-14                   |
| 28.       | Participant checking         | Did participants provide feedback on the findings?                                                                                       | No                                                           |
| Reporting |                              |                                                                                                                                          |                                                              |
| 29.       | Quotations presented         | Were participant quotations presented to illustrate the themes / findings? Was each quotation identified? <i>e.g. participant number</i> | See Manuscript, Results Pages 15-26 and Case Studies, Box 1. |
| 30.       | Data and findings consistent | Was there consistency between the data presented and the findings?                                                                       | See Manuscript, Results Pages 15-26 .                        |
| 31.       | Clarity of major themes      | Were major themes clearly presented in the findings?                                                                                     | See Manuscript, Results Pages 15-26.                         |

1  
2  
3  
4  
5  
6  
7  
8  
9  
10  
11  
12  
13  
14  
15  
16  
17  
18  
19  
20  
21  
22  
23  
24  
25  
26  
27  
28  
29  
30  
31  
32  
33  
34  
35  
36  
37  
38  
39  
40  
41  
42  
43  
44  
45  
46

| No  | Item                    | Guide questions/description                                            | Responses and reference in manuscript if appropriate |
|-----|-------------------------|------------------------------------------------------------------------|------------------------------------------------------|
| 32. | Clarity of minor themes | Is there a description of diverse cases or discussion of minor themes? | See Manuscript, Results Pages 15-26.                 |

For peer review only

1  
2  
3  
4  
5  
6  
7  
8  
9  
10  
11  
12  
13  
14  
15  
16  
17  
18  
19  
20  
21  
22  
23  
24  
25  
26  
27  
28  
29  
30  
31  
32  
33  
34  
35  
36  
37  
38  
39  
40  
41  
42  
43  
44  
45  
46  
47  
48  
49  
50  
51  
52  
53  
54  
55  
56  
57  
58  
59  
60

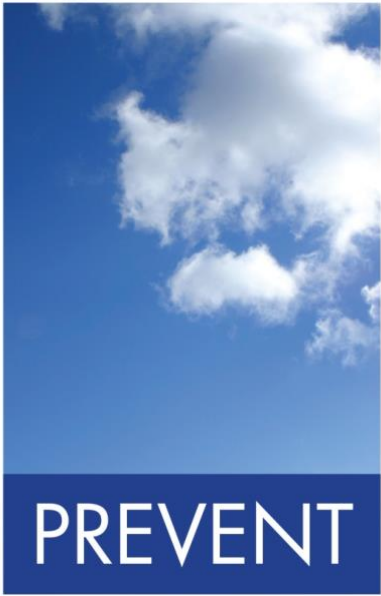

# 1-month Feedback Booklet

For peer review only

## PREVENT Feedback Booklet

As researchers, we are very aware that we are working with people. In this case, a specific group of people who have all suffered from depression at times in their lives. We are careful to never lose sight of the fact that each person is also an individual with their own personality, feelings, and experiences.

One of our aims is to find out about the thoughts, feelings and experiences of the people taking part in this research project at two time points: 4-6 weeks after your final session of MBCT, and again at the end of your involvement in the project. We want to hear your individual views because we think that we can learn a lot from them.

Please take time to think about the questions in this booklet and answer them in your own words. It might be useful to read through the questions before writing your answers, in order to become familiar with them. Tell us exactly what you think! We won't be offended if you didn't like some parts, or even all, of the project. If you found some or all of it useful, helpful or enjoyable, then tell us that too, and please tell us why.

There are 11 questions in the booklet. Write as much, or as little as you like. If you feel that you have more to say than there is space for then please call us on 01392 726102 and we'll provide you with a second booklet.

As we have said in the past, we guarantee your privacy and confidentiality. Nothing that you say here will be published or printed in any way that could identify you, and no unauthorised person will ever read this booklet.

Once you have completed the booklet, please return it to us in the envelope provided. The envelope has a freepost sticker on it, so you do not need to pay for postage.

Finally, many thanks for the effort you have put in to this project so far. Hopefully our research will enable us to develop new and better ways to help people stay well after depression.

The PREVENT Team

PREVENT Trial ID: \_\_\_\_\_  
PREVENT Feedback Booklet 1.1 v2. 02.10.10

## Reducing your antidepressants

The first set of questions aims to explore your **thoughts** towards, and **experiences** of, taking and reducing your antidepressant medication.

1. Please describe your experiences of using antidepressants before taking part in the MBCT course. For example, did you feel that antidepressants were having a positive impact upon your day-to-day life and functioning? Did you experience any difficulties taking antidepressants in the past? Please explain why.

.....

.....

.....

.....

.....

.....

.....

.....

2. During the MBCT course you were asked to try to reduce your use of antidepressants. Please can you describe what your **thoughts** were towards reducing your antidepressants directly before the MBCT course started and again during the MBCT course when you were asked to try reducing them?

Thoughts about reducing antidepressants *before* the MBCT course:

.....

.....

.....

.....

.....

.....

.....

Thoughts about reducing antidepressants *during* the MBCT course:

.....

.....

.....

.....

.....

.....

.....

1  
2 2. Can you please describe your **experiences** of reducing your use of antidepressants  
3 during the MBCT course up until this point now?

4 For example, have you started to reduce your antidepressants? (If YES, please  
5 continue below. If NO, please go to Question 3)  
6  
7

8 When did you start reducing your antidepressants? (Please be as specific as possible  
9 about the date)  
10  
11

12 .....  
13  
14  
15  
16 What positive impact, if any, has reducing your antidepressants had on your day-to-  
17 day life and functioning?  
18

19 .....  
20 .....  
21 .....  
22 .....  
23 .....  
24 .....  
25 .....  
26

27  
28  
29 What difficulties, if any, did you experience when reducing your antidepressants?  
30

31 .....  
32 .....  
33 .....  
34 .....  
35 .....  
36 .....  
37 .....  
38 .....  
39 .....  
40 .....  
41

42  
43  
44 Did you do anything in particular to overcome these difficulties?  
45

46 .....  
47 .....  
48 .....  
49 .....  
50 .....  
51 .....  
52 .....  
53 .....  
54 .....  
55 .....  
56



1  
2  
3  
4  
5  
6  
7  
8  
9  
10  
11  
12  
13  
14  
15  
16  
17  
18  
19  
20  
21  
22  
23  
24  
25  
26  
27  
28  
29  
30  
31  
32  
33  
34  
35  
36  
37  
38  
39  
40  
41  
42  
43  
44  
45  
46  
47  
48  
49  
50  
51  
52  
53  
54  
55  
56  
57  
58  
59  
60

If you have tried reducing your antidepressants in the past, please describe if your experiences of reducing your antidepressants recently has been different, and if so, in what ways. If there has been no difference, please let us know.

.....  
.....  
.....  
.....  
.....  
.....

3. It would be useful for us to know more about why people who take part in this research study do not reduce their antidepressants. Please could you describe why you have not reduced your antidepressant medication at this stage in the research study?

.....  
.....  
.....  
.....  
.....  
.....  
.....  
.....  
.....  
.....  
.....

For peer review only

## Taking part in MBCT

The questions in this section aim to find out more about your experiences of taking part in MBCT, and continuing the MBCT exercises after the course.

4. Out of the 8 week course, how many MBCT sessions did you attend?

..... out of 8 sessions.

5. Did you attend the first MBCT follow-up session? YES / NO

6. What, if any, MBCT exercises are you still practicing? Please tick the ones you are still practicing and in the space provided write how often you practice (e.g. per week or per month).

None

Body scan

.....

Sitting meditation

.....

10-min sit

.....

20-min sit

.....

Silence with bells

.....

Breathing space (regular, 3 times a day)

.....

Breathing space ('coping' space)

.....

Mindful walking

.....

Stretch and breath

.....

Mindful activities (please specify what, and how often per week or month)

.....

Other (please specify)

.....

.....

1  
2 7. Please describe anything that you may have found **helpful** about taking part in the  
3 MBCT course and practicing the mindfulness meditation exercises, **and why**.  
4  
5

6 Specific aspects of the MBCT course you found **helpful**, and why:  
7

8 .....  
9 .....  
10 .....  
11 .....  
12 .....  
13 .....  
14 .....  
15 .....  
16 .....  
17 .....  
18 .....  
19 .....  
20 .....  
21 .....  
22 .....  
23 .....

24  
25  
26  
27  
28  
29  
30  
31 Specific aspects of the meditation practices and teachings that you found **helpful**,  
32 and why:  
33

34 .....  
35 .....  
36 .....  
37 .....  
38 .....  
39 .....  
40 .....  
41 .....  
42 .....  
43 .....  
44 .....  
45 .....  
46 .....  
47 .....  
48 .....  
49 .....

1  
2 8. Please describe anything that you may have found **unhelpful** about taking part in  
3 the MBCT course and practicing the mindfulness meditation exercises, and **why**.  
4  
5

6  
7 Specific aspects of the MBCT course that you found **unhelpful**, and why:  
8

9 .....  
10 .....  
11 .....  
12 .....  
13 .....  
14 .....  
15 .....  
16 .....  
17 .....  
18 .....  
19 .....  
20 .....  
21 .....  
22 .....  
23 .....

24  
25  
26  
27  
28  
29  
30  
31 Specific aspects of the MBCT practices and teachings that you found **unhelpful**, and  
32 why:  
33

34 .....  
35 .....  
36 .....  
37 .....  
38 .....  
39 .....  
40 .....  
41 .....  
42 .....  
43 .....  
44 .....  
45 .....  
46 .....  
47 .....  
48 .....  
49 .....





1  
2  
3  
4  
5  
6  
7  
8  
9  
10  
11  
12  
13  
14  
15  
16  
17  
18  
19  
20  
21  
22  
23  
24  
25  
26  
27  
28  
29  
30  
31  
32  
33  
34  
35  
36  
37  
38  
39  
40  
41  
42  
43  
44  
45  
46  
47  
48  
49  
50  
51  
52  
53  
54  
55  
56  
57  
58  
59  
60

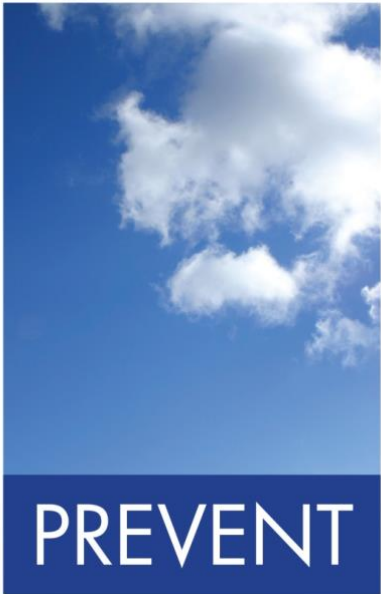

For peer review only

# 24-month Feedback Booklet

## PREVENT 24-month Feedback Booklet

As researchers, we are very aware that we are working with people. In this case, a specific group of people who have all suffered from depression at times in their lives. We are careful to never lose sight of the fact that each person is also an individual with their own personality, feelings, and experiences.

One of our aims is to find out about the thoughts, feelings and experiences of the people taking part in this research project. We asked you to complete a feedback booklet in the weeks after attending MBCT, and we would be really grateful if you could now complete a second feedback booklet to explore your experiences of taking part in the project over the past two years. We want to hear your individual views because we think that we can learn a lot from them.

Please take time to think about the questions in this booklet and answer them in your own words. It might be useful to read through the questions before writing your answers, in order to become familiar with them. Tell us exactly what you think! We won't be offended if you didn't like some parts, or even all, of the project. If you found some or all of it useful, helpful or enjoyable, then tell us that too, and please tell us why.

**There are 4 parts to this booklet and 27 questions in total, although not all of them will apply to you. Please read the instructions throughout the booklet to check which questions are relevant to you.**

Please write as much, or as little, as you like. If you feel that you have more to say than there is space for then please use the back sheet to write any additional feedback.

As we have said in the past, we guarantee your privacy and confidentiality. Nothing that you say here will be published or printed in any way that could identify you, and no unauthorised person will ever read this booklet.

Once you have completed the booklet please give it to your PREVENT researcher at the 24-month assessment.

Finally, many thanks for the effort you have put in to this project. Hopefully our research will enable us to develop new and better ways to help people stay well after depression.

The PREVENT Team

PREVENT Trial ID: \_\_\_\_\_



## Part I: Experiences of Reunions

Following your MBCT course you were invited to attend four MBCT reunion sessions.

1. How many did you attend? (Please circle)

None            1            2            3            4

2. Were there any specific reasons for attending this number of reunion sessions?

.....  
.....  
.....  
.....  
.....  
.....  
.....  
.....  
.....

**If you didn't attend any reunions, please go to Part II on page 4.**

**If you attended some or all reunion sessions, please continue below.**

3. Please describe what you found helpful and / or unhelpful about the reunion sessions?

.....  
.....  
.....  
.....  
.....  
.....  
.....

1  
2  
3  
4  
5  
6  
7  
8  
9  
10  
11  
12  
13  
14  
15  
16  
17  
18  
19  
20  
21  
22  
23  
24  
25  
26  
27  
28  
29  
30  
31  
32  
33  
34  
35  
36  
37  
38  
39  
40  
41  
42  
43  
44  
45  
46  
47  
48  
49  
50  
51  
52  
53  
54  
55  
56  
57  
58  
59  
60

4. Have you used any other support to maintain your mindfulness practice (for example, keeping in contact with anyone from your MBCT course, or joining local meditation groups)? Please describe how this has been helpful and / or unhelpful and why.

.....

.....

.....

.....

.....

.....

.....

.....

.....

For peer review only

## Part II: Doing Mindfulness Practices

Which of the following statements best describes your use of mindfulness techniques (both formal practices and other mindful activities) over the past two years? Please tick one box and then follow the instructions for which question to complete next:

- I've used mindfulness techniques regularly over the last 2 years (please continue to Question 5)
- I used mindfulness techniques for a while after the MBCT course but my practice has tailed off and I no longer practice (please continue to Question 5)
- I've used mindfulness techniques off and on during the last 2 years (please continue to Question 5)
- I have not used mindfulness techniques at all since the MBCT course (please go to Question 7)

5. Please complete the two tables below to tell us which techniques you have practiced over the past two years and what you are currently practicing.

The following table provides a list of mindfulness practices from the MBCT course.

|                                                          | Currently        | Over the past two years                                                                        |
|----------------------------------------------------------|------------------|------------------------------------------------------------------------------------------------|
| <b>Example: Body Scan</b>                                | 2 times per week | <i>Regularly for about 3 months after the course but then stopped. Restarted 2 months ago.</i> |
| <b>Body Scan</b>                                         | times per        |                                                                                                |
| <b>Sitting Meditation</b>                                | times per        |                                                                                                |
| <b>10-minute sit</b>                                     | times per        |                                                                                                |
| <b>20-minute sit</b>                                     | times per        |                                                                                                |
| <b>Silence with Bells</b>                                | times per        |                                                                                                |
| <b>Breathing Space<br/>(Regular, e.g. 3 times a day)</b> | times per        |                                                                                                |
| <b>Breathing Space<br/>(‘Coping’ space)</b>              | times per        |                                                                                                |
| <b>Mindful Walking</b>                                   | times per        |                                                                                                |
| <b>Mindful Movement / Yoga</b>                           | times per        |                                                                                                |

The following table gives you space to record any mindful activities you've practiced.

| Mindful Activities                        | Currently            | Over the past two years                                                         |
|-------------------------------------------|----------------------|---------------------------------------------------------------------------------|
| <i>E.g., being mindful when showering</i> | <i>Every morning</i> | <i>Every morning, although I stopped for roughly 3 months about a year ago.</i> |
|                                           |                      |                                                                                 |
|                                           |                      |                                                                                 |
|                                           |                      |                                                                                 |
|                                           |                      |                                                                                 |
|                                           |                      |                                                                                 |

6. Have you adapted any of the mindfulness exercises you learned in the MBCT course to suit you? If so, how? Why did you make these changes?

.....

.....

.....

.....

.....

.....

.....

.....

.....

.....

7. If you do not currently practice any mindfulness techniques, please describe why.

.....

.....

.....

.....

.....

.....

.....

.....

.....

.....

1  
2  
3 **Part III: The impact of MBCT and mindfulness practice**  
4  
5

6 8. Do you feel that MBCT “works” for you? If so, how do you think it works? If you  
7 would like to, please use examples from your life.  
8

9  
10 .....  
11 .....  
12 .....  
13 .....  
14 .....  
15 .....  
16 .....  
17 .....  
18 .....  
19 .....  
20 .....  
21

22  
23 9. What is the single most important thing that you’ve learned through attending the  
24 MBCT course or practicing mindfulness techniques? Please explain your answer.  
25

26 .....  
27 .....  
28 .....  
29 .....  
30 .....  
31 .....  
32 .....  
33 .....  
34 .....  
35 .....  
36 .....  
37 .....  
38

39  
40  
41 10. MBCT may not be the right treatment for everyone. If you feel that MBCT was  
42 not right for you, please tell us why.  
43

44 .....  
45 .....  
46 .....  
47 .....  
48 .....  
49 .....  
50 .....  
51 .....  
52 .....  
53 .....  
54 .....  
55 .....  
56 .....  
57



1  
2  
3  
4 **Part IV: Taking antidepressants**  
5

6 **We are interested in learning more about your experiences of taking and reducing**  
7 **antidepressants over the past two years.**  
8

9  
10  
11 12. Have your thoughts about reducing your antidepressants changed over the past  
12 two years? If so, in what ways?  
13

14 .....  
15 .....  
16 .....  
17 .....  
18 .....  
19 .....  
20 .....  
21 .....  
22 .....  
23 .....  
24

25  
26  
27 13. Does taking antidepressant medication “work” for you? If so, please tell us why. If  
28 taking antidepressants does not “work” for you, please also tell us why. If you would  
29 like to, please use examples from your life.  
30

31 .....  
32 .....  
33 .....  
34 .....  
35 .....  
36 .....  
37 .....  
38 .....  
39 .....  
40 .....  
41

42  
43  
44 14. What role has your GP had in your use of antidepressant medication over the past  
45 two years? How have you found this?  
46

47 .....  
48 .....  
49 .....  
50 .....  
51 .....  
52 .....  
53 .....  
54 .....  
55 .....  
56 .....  
57



1  
2  
3 15. Has anyone else been involved in your use of antidepressant medication over the  
4 past two years? (E.g., psychiatrist, family member, another practitioner). If so, in  
5 what ways?  
6  
7

8 .....  
9 .....  
10 .....  
11 .....  
12 .....  
13 .....  
14 .....  
15 .....  
16 .....  
17 .....

18  
19  
20  
21  
22  
23 Which of the following best describes your use of antidepressants over the last two  
24 years? Please tick one box and follow the instructions for which questions to  
25 complete next.  
26

- 27  
28  
29  I have continued using antidepressants and have not reduced my use at any  
30 point over the past two years that I've been involved in this study. (Tick this  
31 box even if you have changed to a different antidepressant, or increased the  
32 dosage of your antidepressant.)  
33

34 Please answer the questions in the  box on the following page.  
35  
36  
37  
38  
39

- 40  
41  I am in the process of reducing my antidepressants, or have reduced/stopped  
42 my use of antidepressants at some point over the past two years that I've  
43 been involved in this study. (Tick this box even if you restarted or increased  
44 your medication at a later date.)  
45

46 Please answer the questions in the  box on page 12  
47  
48  
49  
50  
51  
52  
53  
54  
55  
56  
57  
58  
59  
60

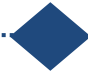

1  
2  
3  
4  
5 16. In your day-to-day life and functioning over the past two years, have you  
6 experienced any positive effects of continuing to use antidepressants? If so, please  
7 describe these.  
8  
9

10 .....  
11 .....  
12 .....  
13 .....  
14 .....  
15 .....  
16 .....  
17 .....

18  
19 17. In your day-to-day life and functioning over the past two years, have you  
20 experienced any negative effects or difficulties in continuing to use antidepressants?  
21 If so, please describe these.  
22  
23

24 .....  
25 .....  
26 .....  
27 .....  
28 .....  
29 .....  
30 .....  
31 .....  
32 .....

33  
34  
35 18. Have you done anything specific to overcome these negative effects or  
36 difficulties? If so, what have you done?  
37  
38

39 .....  
40 .....  
41 .....  
42 .....  
43 .....  
44 .....  
45 .....  
46 .....  
47 .....

48  
49 19. Please describe why you haven't reduced your antidepressant medication over the  
50 past two years.  
51  
52

53 .....  
54 .....  
55 .....  
56 .....  
57 .....  
58 .....  
59 .....  
60 .....

**Please now go to Question 27 on page 11.**

1  
2  
3  
4  
5  
6  
7  
8  
9  
10  
11  
12  
13  
14  
15  
16  
17  
18  
19  
20  
21  
22  
23  
24  
25  
26  
27  
28  
29  
30  
31  
32  
33  
34  
35  
36  
37  
38  
39  
40  
41  
42  
43  
44  
45  
46  
47  
48  
49  
50  
51  
52  
53  
54  
55  
56  
57  
58  
59  
60

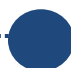

20. Has reducing your use of antidepressants had any positive effects on your day-to-day life and functioning over the past two years? If so, please describe how.

.....  
.....  
.....  
.....  
.....

21. Have you experienced any negative effects or difficulties associated with reducing your antidepressants over the past two years? If so, please describe them.

.....  
.....  
.....  
.....  
.....

22. Have you done anything specific to overcome these negative effects or difficulties? If so, what have you done?

.....  
.....  
.....  
.....  
.....

23. Has practicing mindfulness techniques helped with these negative effects or difficulties? If so, in what ways?

.....  
.....  
.....  
.....  
.....

Continued...

Continued...

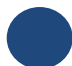

1  
2  
3  
4  
5  
6 24. Have you stopped using antidepressant medication completely, now or at any  
7 point in the last two years? Please describe your experiences of this.  
8  
9

10 .....  
11 .....  
12 .....  
13 .....  
14 .....  
15 .....  
16 .....  
17 .....

18  
19 25. Have you tried reducing your antidepressants at any point before this study? If so,  
20 please tell us of any ways that reducing your antidepressants over the past two years  
21 been different? If there has been no difference, why do you think this is the case?  
22  
23

24 .....  
25 .....  
26 .....  
27 .....  
28 .....  
29 .....  
30 .....  
31 .....

32  
33 26. Have you reduced or stopped your antidepressants over the past two years and  
34 then restarted or increased them again? If so, please tell us about this, and how you  
35 felt about this?  
36  
37

38 .....  
39 .....  
40 .....  
41 .....  
42 .....  
43 .....  
44 .....  
45 .....  
46 .....

47  
48  
49 Please go to Question 27 on the following page.  
50  
51

1  
2  
3 **Any other comments?**  
4

5 **27. Thank you for taking the time to complete this booklet - your participation is**  
6 **greatly appreciated!** If you have any other comments that you would like to share  
7 about your experiences of taking part in this project which did not fit into any of the  
8 answer spaces above, please use the space below.  
9

10  
11  
12 .....  
13 .....  
14 .....  
15 .....  
16 .....  
17 .....  
18 .....  
19 .....  
20 .....  
21 .....  
22 .....  
23 .....  
24 .....  
25 .....  
26 .....  
27 .....  
28 .....  
29 .....  
30 .....  
31 .....  
32 .....  
33 .....  
34 .....  
35 .....

For peer review only

## PREVENT: End of Trial Interviews Guidance for Interviewers

### Aims

Researchers will conduct interviews with 42 purposively sampled participants in the MBCT arm of the trial at the end of the trial. The research topic we are targeting here is: Participants' experiences during the follow-up period of the PREVENT trial of use of ADMs and MBCT-based techniques in relation to each other, during periods of wellness, depressive relapse, and transitions between these two.

### Interview Preparation

Before conducting any of the interviews researchers read the key qualitative papers (Malpass et al., 2012; Allen et al., 2009). Before each interview researcher to read the participant's file to (re-) familiarise themselves with participant characteristics (e.g., relationship status) and obtain timeline populated with info on borderline or actual relapses and ADM usage. They should also review, and have to hand in the interview, the end of treatment and 24-month feedback booklets to get a sense of the profile of each participant during the follow-up period in terms of the following variables: full or partial attendance of MBCT course; use of mindfulness techniques; use of ADMs; and any significant life events. This will shape the interview in terms of: i) which sub-sections of the interview are relevant; ii) issues for particular participants that may need to be probed in more detail. Make sure you are as clear as possible about which sections of the interview and questions are relevant to your respondent BEFORE YOU START. Where possible, **choose specific/representative/salient episodes or junctures** in timeline for targeted probing using the schedule (possibly match them onto wellness, wobbles, and depressive sections). **Print out two copies of timeline**, one for yourself and one for the interviewee to draw upon.

### Conducting the Interview

The interview is semi-structured. In each section, questions and follow-up questions are suggested. However, researchers should use their judgment in drawing out participants in relation to the research topic. Interviewers ask open-ended questions and follow participants' "leads" while keeping in mind the research question. The aim is to enable participants to give their "story" around the main topics of investigation.

Researchers should be strategic in use of time in the interview to ensure the topic guide/respondent covers material that answers the research questions; especially in Section 1, it is important to keep the interview focused. If the interviewer feels respondents are being unclear or opaque help the respondent unpack what they mean or agree with the participant that the issue is unclear. Interviewers should ensure *that all the interview questions that are relevant to the participants' particular profile are covered*. Consider a temporal order to do the interview allocating/planning pre-set time windows for each consecutive episode/junction so as not to exceed a **maximum of 60 minutes** for the overall interview.

Participants may feel the need to please researchers or give the "right" answers. This is particularly likely around ADM tapering where the trial has consistently communicated that we want participants to taper and discontinue their ADM. It is important that researchers communicate explicitly and non-

1  
2  
3 verbally that there are no right and wrong answers to any of the questions and we want to know  
4 people's experiences in relation to MBCT and ADM.

5 Use of particular terms (e.g., "wobble," "relapse") can be adapted in the light of language used by  
6 participants. Follow-up questions should be asked for clarification and elaboration, *and this should be*  
7 *driven by the research aim for each section of the interview.* As far as possible interviewers should  
8 cover all the suggested topics and questions and behave with the minimum of variation between  
9 interviews. Instructions to interviewers and suggested wordings for introductions to each section are  
10 given in italics below. The key issues for each question are in bold.  
11  
12

### 13 14 **Interview Opening / Introduction**

15  
16 Open the interview with something like:

17  
18  
19 *"Thank you for agreeing to do this interview with me. The interview is about hearing from you how*  
20 *things have been in the trial and checking that we have your story right. It will be collaborative and*  
21 *semi-structured which means I have some topics I'd like to cover, but the questions will be quite open*  
22 *so as to give you, as an expert of your own lived experience, a chance to express your own views and*  
23 *tell me about your experiences and what seems important to you. Everyone will have had different*  
24 *experiences and we are interested in hearing about these from your point of view – both the good and*  
25 *the not-so-good experiences – so that we can learn about and develop our treatments further. Please*  
26 *tell us exactly how you feel!*

27  
28 *Just to let you know that I am un-blinded and know that you have participated in the MBCT group, so*  
29 *it is ok to talk freely about this. I would like to record this interview, and the recording will be*  
30 *transcribed word for word and analysed as part of the research for the PREVENT trial. All*  
31 *identifying information will be removed at this point. Your name will never appear on the*  
32 *transcription or any other documents or files that result from this interview (such as the audio file).*  
33 *Do you have any questions before we begin?"*  
34  
35

### 36 37 **Section 1: Overview of the follow-up period using the timeline**

38  
39 The aim of this section is to obtain a brief overview of how the participant has experienced the  
40 follow-up period in terms of three areas: 1. Periods of wellness and depression; 2. Antidepressant  
41 medication; 3. Life events. Subsequent interview sections follow up on each of these in more detail  
42 and the profile of experiences here can be used to tailor subsequent interview questions. Information  
43 on the first two areas should be available in advance and summarised on the prepared timeline.  
44 Information on life events might be found in the research files and database but will need to be  
45 obtained here. Preparation by thoroughly reading the file, and possibly even some of the audio  
46 recordings, in advance will help a lot here.

47  
48 Use the timeline in whatever way feels most comfortable and guided by the respondent's preference.  
49 The participant can add life events him/herself; or the researcher can do this; or it can simply be used  
50 as a guide. Show the timeline and say something like:  
51  
52

53  
54 *"I'd like to start with a brief overview of how life has been for you in the trial. In preparing for our*  
55 *meeting today, we have put together this timeline. It summarises the information you have given us as*  
56 *part of the research study about any periods of depression or wobbles, and your use of antidepressant*  
57 *medication during the trial. It also includes the date of your most recent episode of depression*  
58 *before taking part in the trial, based upon what you told us during your first assessment. I've also*  
59  
60

1  
2  
3 *looked through your comments in the Feedback Booklets you completed one month after the end of*  
4 *the mindfulness course and again recently. These were very helpful and I'll use some of what you*  
5 *wrote there to guide what we talk about today."*  
6  
7

8 Interview Question

Probes/Examples/Directions

9 ***1.1. Do you think the information we have here on the timeline***  
10 ***looks about right? Is there anything you would like to change?***

If we know from previous assessments that the person has had a significant life event ensure this is acknowledged here. Mark – or get the respondent to mark – any life events on the time-line / graph.

11  
12  
13  
14  
15  
16  
17  
18 ***1.2. Have there been any important events in your life during***  
19 ***your time in the trial that have affected you either positively or***  
20 ***negatively that we can add to the timeline?***

Keep the discussion focused and brief to allow as much time for later sections as possible.

21 ***1.3. Can we check that I have your use of antidepressant***  
22 ***medication right these last two years?***

Work through timeline for any tapering/discontinuation, dosage, resumption etc.

23  
24  
25 ***1.4. How have things been between the last time we spoke and***  
26 ***today?***

Informally extend timeline with relevant depressive episodes/ADM use/life events up until current interview date; Where necessary, establish current symptomatic status (informally) and make sure they are ok to continue.

27  
28  
29  
30  
31  
32  
33  
34  
35 *"The remaining questions in this interview will focus upon your experiences with the aid of this*  
36 *timeline."*  
37

38  
39  
40  
41  
42  
43  
44  
45  
46  
47  
48  
49  
50  
51  
52  
53  
54  
55  
56  
57  
58  
59  
60  
Keep the time-line / graph in view to refer back to / use further in later parts of the interview. Use the timeline to keep the interview contained with regard to the different episodes/junctures identified prior to interview. Allow and encourage the participant to use a pen to put down details in their copy of the timeline.

**Section 2: Questions on wellness (for all)**

Comment on Section 2-4: Particularly in the wobbles section it is important to go for depth rather than breadth with regards to potential issues around these time points (e.g. what happened in days before, relationships, sleep etc.). As a general principle, interviewers should encourage interviewees to focus on prototypical or most memorable junctures in timeline. In order to keep interview contained, agree on a timeframe for each episode/juncture and keep questions focused on this.

*"I'd like to ask about any times when you were well during the trial – when you weren't feeling low or experiencing an episode of depression"*



| Interview Question                                                                                                                | Probes/Examples/Directions                                                                                                             |
|-----------------------------------------------------------------------------------------------------------------------------------|----------------------------------------------------------------------------------------------------------------------------------------|
| <i>2.1. Has anything from the mindfulness course played a part in staying well during the trial? If so, can you describe how?</i> | Examples: any techniques, ideas; response plan<br>Prompts: How / why / why not?;<br>Therapist/Group/Researcher Role                    |
| <i>2.2 Did your use of antidepressants play a part in staying well during the trial? If so, can you describe how?</i>             | Prompts: How / why / why not? ;<br>GP Role                                                                                             |
| <i>2.3 What about the combination of xxx from the mindfulness course and use of antidepressants in periods of wellness?</i>       | [ask this additional question if respondent says that both MBCT and ADM have had some value in questions 2.2 and 2.3., otherwise skip] |

### Section 3: Question on wobbles / early signs of depression (for all)

*“I’d like to ask about any times when you were well, but you felt yourself starting to ‘wobble’ or feel low. So any times when you might have felt that your mood was dipping or you were starting to have more of the negative thoughts that were around when you were depressed”*

| Interview Question                                                                                                                                              | Probes/Examples/Directions                                                                                                                                                                   |
|-----------------------------------------------------------------------------------------------------------------------------------------------------------------|----------------------------------------------------------------------------------------------------------------------------------------------------------------------------------------------|
| <i>3.1. How did these experiences of ‘wobbles’ or starting to feel low compare to previous experiences of wobbles?</i>                                          | Use timeline to go right into the situation shortly before, during and directly after episode.<br>Probe: What happened, how was it different? What did you do?<br>How did you get out of it? |
| <i>3.2. Was anything from the mindfulness course useful at the time of wobbling or when starting to feel low during the trial? If so, can you describe how?</i> | Probe: before/during/after wobble<br>Examples: any techniques, ideas; response plan, self-compassion etc.<br>Prompts: How / why / why not?                                                   |
| <i>3.3 Did your use of antidepressants during the trial play a part in wobbling or starting to feel low during the trial? If so, can you describe how?</i>      | Prompts: How / why / why not?                                                                                                                                                                |
| <i>3.4 What about the combination of xxx from the mindfulness course and use of antidepressants in periods of wobbling or when starting to feel low?</i>        | [ask this additional question if respondent says that both MBCT and ADM have had some value, otherwise skip as appropriate]                                                                  |

#### Section 4: Experiences of depressive relapse (for those who have relapsed)

Use the timeline to guide question choices in relation to experiences of relapse.

Say: "I'd like to ask you about your experiences this / these episode of depression..."

| Interview Question                                                                                                                   | Probes/Examples/Directions                                                                                                                                                                          |
|--------------------------------------------------------------------------------------------------------------------------------------|-----------------------------------------------------------------------------------------------------------------------------------------------------------------------------------------------------|
| <b>4.1. How did this episode of depression compare to previous episodes of depression?</b>                                           | Use timeline to take them right into the situation shortly before, during and directly after episode.<br>Probe: What happened, how was it different? What did you do?<br>How did you get out of it? |
| <b>4.2. Was anything from the mindfulness course useful at the time of depression? If so, can you describe how?</b>                  | Examples: any techniques, ideas; response plan<br>Prompts: How / why / why not?                                                                                                                     |
| <b>4.3. Did your use of antidepressants during the trial play a part in this episode of depression? If so, can you describe how?</b> | Prompts: How / why / why not?                                                                                                                                                                       |
| <b>4.4 What about the combination of xxx from the mindfulness course and use of antidepressants in periods of depression?</b>        | [ask this additional question if respondent says that both MBCT and ADM have had some value, otherwise skip as appropriate]                                                                         |

#### Section 5: MBCT and ADMs combined

"I'd like to end with some open questions about your experiences of taking part in this study."

For sakes of time keeping and for keeping this section contained it is critical how the questions are set up. Encourage people to step back from and reflect critically on their own experience rather than letting them share their raw experience. Use formulations like the following: 'I am sure that this was an intensive time for you. If you took yourself away from the experience today and were to reflect on this, what may I ask are the key elements/thoughts that you would have with regards to staying well etc.?'

| Interview Question                                                                                                 | Probes/Examples/Directions                                                                                                             |
|--------------------------------------------------------------------------------------------------------------------|----------------------------------------------------------------------------------------------------------------------------------------|
| <b>5.1. Has taking part in the trial changed the way you think about depression? If so, could you tell me how?</b> | Probe: How/why /why not?<br>Probe: Has it changed the way you think about the causes/consequences of depression? Role of GP.           |
| <b>5.2. Has taking part in the trial changed how you think about yourself? If so, could you tell me how?</b>       | Probe: how identity was before the trial if person describes a sense of change.<br>Examples: Role of group, immediate and wider social |

|                                                                                                                                                        |                                                                                                                                                                |
|--------------------------------------------------------------------------------------------------------------------------------------------------------|----------------------------------------------------------------------------------------------------------------------------------------------------------------|
|                                                                                                                                                        | environment                                                                                                                                                    |
| <b>5.3. Now that you have had experiences of both mindfulness and antidepressants, what do you think of each of them as treatments for depression?</b> | Probes: do you favour one over the other? In combination? At different points e.g. in wellness, wobbles and depressive episodes? For prevention? For recovery? |
| <b>5.4. Apart from depression, has taking part in the trial had any impact on other psychological or physical health problems you may have?</b>        | Examples: Anxieties/phobias, Chronic health conditions like pain, diabetes etc.                                                                                |

## Section 6: Ending

*“I’ve covered all the questions we have, but before we end, is there anything you would like to add?”*

| Interview Question                                                                                                                  | Probes/Examples/Directions |
|-------------------------------------------------------------------------------------------------------------------------------------|----------------------------|
| <b>6.1. ...about any of the topics we have discussed?</b>                                                                           |                            |
| <b>6.2. ...about any of your experiences of depression, mindfulness or antidepressant medication that we have not talked about?</b> |                            |
| <b>6.3. ...about anything else you think is relevant to this project on MBCT, antidepressants, and depression?</b>                  |                            |

End by thanking the respondent for their time and for sharing their views and experiences. Reiterate how valuable this is for research trying to develop treatments for depression. Inform them about further dissemination of PREVENT findings.

## COREQ (COnsolidated criteria for REporting Qualitative research) Checklist

A checklist of items that should be included in reports of qualitative research. You must report the page number in your manuscript where you consider each of the items listed in this checklist. If you have not included this information, either revise your manuscript accordingly before submitting or note N/A.

| Topic                                          | Item No. | Guide Questions/Description                                                                                                                              | Reported on Page No. |
|------------------------------------------------|----------|----------------------------------------------------------------------------------------------------------------------------------------------------------|----------------------|
| <b>Domain 1: Research team and reflexivity</b> |          |                                                                                                                                                          |                      |
| <i>Personal characteristics</i>                |          |                                                                                                                                                          |                      |
| Interviewer/facilitator                        | 1        | Which author/s conducted the interview or focus group?                                                                                                   |                      |
| Credentials                                    | 2        | What were the researcher's credentials? E.g. PhD, MD                                                                                                     |                      |
| Occupation                                     | 3        | What was their occupation at the time of the study?                                                                                                      |                      |
| Gender                                         | 4        | Was the researcher male or female?                                                                                                                       |                      |
| Experience and training                        | 5        | What experience or training did the researcher have?                                                                                                     |                      |
| <i>Relationship with participants</i>          |          |                                                                                                                                                          |                      |
| Relationship established                       | 6        | Was a relationship established prior to study commencement?                                                                                              |                      |
| Participant knowledge of the interviewer       | 7        | What did the participants know about the researcher? e.g. personal goals, reasons for doing the research                                                 |                      |
| Interviewer characteristics                    | 8        | What characteristics were reported about the interviewer/facilitator? e.g. Bias, assumptions, reasons and interests in the research topic                |                      |
| <b>Domain 2: Study design</b>                  |          |                                                                                                                                                          |                      |
| <i>Theoretical framework</i>                   |          |                                                                                                                                                          |                      |
| Methodological orientation and Theory          | 9        | What methodological orientation was stated to underpin the study? e.g. grounded theory, discourse analysis, ethnography, phenomenology, content analysis |                      |
| <i>Participant selection</i>                   |          |                                                                                                                                                          |                      |
| Sampling                                       | 10       | How were participants selected? e.g. purposive, convenience, consecutive, snowball                                                                       |                      |
| Method of approach                             | 11       | How were participants approached? e.g. face-to-face, telephone, mail, email                                                                              |                      |
| Sample size                                    | 12       | How many participants were in the study?                                                                                                                 |                      |
| Non-participation                              | 13       | How many people refused to participate or dropped out? Reasons?                                                                                          |                      |
| <i>Setting</i>                                 |          |                                                                                                                                                          |                      |
| Setting of data collection                     | 14       | Where was the data collected? e.g. home, clinic, workplace                                                                                               |                      |
| Presence of non-participants                   | 15       | Was anyone else present besides the participants and researchers?                                                                                        |                      |
| Description of sample                          | 16       | What are the important characteristics of the sample? e.g. demographic data, date                                                                        |                      |
| <i>Data collection</i>                         |          |                                                                                                                                                          |                      |
| Interview guide                                | 17       | Were questions, prompts, guides provided by the authors? Was it pilot tested?                                                                            |                      |
| Repeat interviews                              | 18       | Were repeat interviews carried out? If yes, how many?                                                                                                    |                      |
| Audio/visual recording                         | 19       | Did the research use audio or visual recording to collect the data?                                                                                      |                      |
| Field notes                                    | 20       | Were field notes made during and/or after the interview or focus group?                                                                                  |                      |
| Duration                                       | 21       | What was the duration of the interviews or focus group?                                                                                                  |                      |
| Data saturation                                | 22       | Was data saturation discussed?                                                                                                                           |                      |
| Transcripts returned                           | 23       | Were transcripts returned to participants for comment and/or                                                                                             |                      |

| Topic                                  | Item No. | Guide Questions/Description                                                                                                        | Reported on Page No. |
|----------------------------------------|----------|------------------------------------------------------------------------------------------------------------------------------------|----------------------|
|                                        |          | correction?                                                                                                                        |                      |
| <b>Domain 3: analysis and findings</b> |          |                                                                                                                                    |                      |
| <i>Data analysis</i>                   |          |                                                                                                                                    |                      |
| Number of data coders                  | 24       | How many data coders coded the data?                                                                                               |                      |
| Description of the coding tree         | 25       | Did authors provide a description of the coding tree?                                                                              |                      |
| Derivation of themes                   | 26       | Were themes identified in advance or derived from the data?                                                                        |                      |
| Software                               | 27       | What software, if applicable, was used to manage the data?                                                                         |                      |
| Participant checking                   | 28       | Did participants provide feedback on the findings?                                                                                 |                      |
| <i>Reporting</i>                       |          |                                                                                                                                    |                      |
| Quotations presented                   | 29       | Were participant quotations presented to illustrate the themes/findings?<br>Was each quotation identified? e.g. participant number |                      |
| Data and findings consistent           | 30       | Was there consistency between the data presented and the findings?                                                                 |                      |
| Clarity of major themes                | 31       | Were major themes clearly presented in the findings?                                                                               |                      |
| Clarity of minor themes                | 32       | Is there a description of diverse cases or discussion of minor themes?                                                             |                      |

Developed from: Tong A, Sainsbury P, Craig J. Consolidated criteria for reporting qualitative research (COREQ): a 32-item checklist for interviews and focus groups. *International Journal for Quality in Health Care*. 2007. Volume 19, Number 6: pp. 349 – 357

**Once you have completed this checklist, please save a copy and upload it as part of your submission. DO NOT include this checklist as part of the main manuscript document. It must be uploaded as a separate file.**
