# Supplementary material for: Recovery from recurrent depression with mindfulness-based cognitive therapy and antidepressants: a qualitative study with illustrative case studies
Source: PubMed Central journal article supplement (PMC7044862; doi:10.1136/bmjopen-2019-033892), 2020-02-18
Supplement: bmjopen-2019-033892supp002.pdf [file bmjopen-2019-033892supp002.pdf]

## Consolidated criteria for reporting qualitative studies (COREQ): 32-item checklist

| No                                             | Item                    | Guide questions/description                                 | Responses and reference in manuscript if appropriate                                   |
|------------------------------------------------|-------------------------|-------------------------------------------------------------|----------------------------------------------------------------------------------------|
| <b>Domain 1: Research team and reflexivity</b> |                         |                                                             |                                                                                        |
| Personal Characteristics                       |                         |                                                             |                                                                                        |
| 1.                                             | Interviewer/facilitator | Which author/s conducted the interview or focus group?      | Contributor statement                                                                  |
| 2.                                             | Credentials             | What were the researcher's credentials? <i>E.g. PhD, MD</i> | AT, BSc; RB, MD; CC, PhD; FG, PhD; RH PhD; JC DClinPsy; AW DClinPsy; NM, PhD; WK, PhD. |
| 3.                                             | Occupation              | What was their occupation at the time of the study?         | All researchers. Title page, affiliation.                                              |

| No | Item                    | Guide questions/description                          | Responses and reference in manuscript if appropriate                                                                                                                                                              |
|----|-------------------------|------------------------------------------------------|-------------------------------------------------------------------------------------------------------------------------------------------------------------------------------------------------------------------|
| 4. | Gender                  | Was the researcher male or female?                   | Female, AT, CC, RH, JC, AW, NM; Male RB, FG, WK.                                                                                                                                                                  |
| 5. | Experience and training | What experience or training did the researcher have? | Lead authors all had extensive research training, interviewers had interview training and RB, FG, NM and WK all had qualitative methods experience and training. See Methods and Statement Concerning Reflexivity |

| No | Item                                     | Guide questions/description                                                                                                                      | Responses and reference in manuscript if appropriate                                                |
|----|------------------------------------------|--------------------------------------------------------------------------------------------------------------------------------------------------|-----------------------------------------------------------------------------------------------------|
|    | Relationship with participants           |                                                                                                                                                  |                                                                                                     |
| 6. | Relationship established                 | Was a relationship established prior to study commencement?                                                                                      | Yes. Manuscript Pages 12-13 and Statement Concerning Reflexivity                                    |
| 7. | Participant knowledge of the interviewer | What did the participants know about the researcher?<br><i>e.g. personal goals, reasons for doing the research</i>                               | Their role in the larger parent trial. See Interview Schedule and Statement Concerning Reflexivity. |
| 8. | Interviewer characteristics              | What characteristics were reported about the interviewer/facilitator? <i>e.g. Bias, assumptions, reasons and interests in the research topic</i> | See Interview Schedule and Statement                                                                |

| No                            | Item                                  | Guide questions/description                                                                                                                                     | Responses and reference in manuscript if appropriate                        |
|-------------------------------|---------------------------------------|-----------------------------------------------------------------------------------------------------------------------------------------------------------------|-----------------------------------------------------------------------------|
|                               |                                       |                                                                                                                                                                 | Concerning Reflexivity.                                                     |
| <b>Domain 2: study design</b> |                                       |                                                                                                                                                                 |                                                                             |
| Theoretical framework         |                                       |                                                                                                                                                                 |                                                                             |
| 9.                            | Methodological orientation and Theory | What methodological orientation was stated to underpin the study? <i>e.g. grounded theory, discourse analysis, ethnography, phenomenology, content analysis</i> | Thematic analysis and case studies. Manuscript, Data Analysis) Pages 13-14) |
| Participant selection         |                                       |                                                                                                                                                                 |                                                                             |
| 10.                           | Sampling                              | How were participants selected? <i>e.g. purposive, convenience, consecutive, snowball</i>                                                                       | Purposive, see Manuscript, Methods, Participants, Pages 9-11.               |

| No      | Item                       | Guide questions/description                                                        | Responses and reference in manuscript if appropriate                 |
|---------|----------------------------|------------------------------------------------------------------------------------|----------------------------------------------------------------------|
| 11.     | Method of approach         | How were participants approached? <i>e.g. face-to-face, telephone, mail, email</i> | See Manuscript, Study Context and Participants, Pages 9-11.          |
| 12.     | Sample size                | How many participants were in the study?                                           | See Manuscript, Study Context and Participants, Pages 9-11.          |
| 13.     | Non-participation          | How many people refused to participate or dropped out? Reasons?                    | See Manuscript, Study Context and Participants, Pages 9-11.          |
| Setting |                            |                                                                                    |                                                                      |
| 14.     | Setting of data collection | Where was the data collected? <i>e.g. home, clinic, workplace</i>                  | See Manuscript, Study Methods, Pages 9-13 as well as published Study |

| No              | Item                         | Guide questions/description                                                              | Responses and reference in manuscript if appropriate                                                                                   |
|-----------------|------------------------------|------------------------------------------------------------------------------------------|----------------------------------------------------------------------------------------------------------------------------------------|
|                 |                              |                                                                                          | Protocol and parent Trial.                                                                                                             |
| 15.             | Presence of non-participants | Was anyone else present besides the participants and researchers?                        | No                                                                                                                                     |
| 16.             | Description of sample        | What are the important characteristics of the sample? <i>e.g. demographic data, date</i> | See Manuscript, Study Context and Participants, Pages 9-11.                                                                            |
| Data collection |                              |                                                                                          |                                                                                                                                        |
| 17.             | Interview guide              | Were questions, prompts, guides provided by the authors? Was it pilot tested?            | See Manuscript, Study Methods, Qualitative Data Collection pages 12-13, as well as the Supplementary Materials which includes both the |

| No  | Item                   | Guide questions/description                                             | Responses and reference in manuscript if appropriate |
|-----|------------------------|-------------------------------------------------------------------------|------------------------------------------------------|
|     |                        |                                                                         | Feedback<br>Booklets and interview<br>Schedules.     |
| 18. | Repeat interviews      | Were repeat interviews carried out? If yes, how many?                   | No                                                   |
| 19. | Audio/visual recording | Did the research use audio or visual recording to collect the data?     | See Manuscript, Study Methods page 13                |
| 20. | Field notes            | Were field notes made during and/or after the interview or focus group? | No                                                   |
| 21. | Duration               | What was the duration of the interviews or focus group?                 | See Manuscript, Study Methods, Interviews, page 13   |
| 22. | Data saturation        | Was data saturation discussed?                                          | Yes, see Study Protocol                              |

| No                                     | Item                           | Guide questions/description                                              | Responses and reference in manuscript if appropriate |
|----------------------------------------|--------------------------------|--------------------------------------------------------------------------|------------------------------------------------------|
| 23.                                    | Transcripts returned           | Were transcripts returned to participants for comment and/or correction? | No                                                   |
| <b>Domain 3: analysis and findings</b> |                                |                                                                          |                                                      |
| Data analysis                          |                                |                                                                          |                                                      |
| 24.                                    | Number of data coders          | How many data coders coded the data?                                     | See Manuscript, Data Analysis, pages 13-14           |
| 25.                                    | Description of the coding tree | Did authors provide a description of the coding tree?                    | See Manuscript, Data Analysis, pages 13-14           |
| 26.                                    | Derivation of themes           | Were themes identified in advance or derived from the data?              | See Manuscript, Data Analysis, pages 13-14           |



| No        | Item                         | Guide questions/description                                                                                                              | Responses and reference in manuscript if appropriate         |
|-----------|------------------------------|------------------------------------------------------------------------------------------------------------------------------------------|--------------------------------------------------------------|
| 27.       | Software                     | What software, if applicable, was used to manage the data?                                                                               | See Manuscript, Data Analysis, pages 13-14                   |
| 28.       | Participant checking         | Did participants provide feedback on the findings?                                                                                       | No                                                           |
| Reporting |                              |                                                                                                                                          |                                                              |
| 29.       | Quotations presented         | Were participant quotations presented to illustrate the themes / findings? Was each quotation identified? <i>e.g. participant number</i> | See Manuscript, Results Pages 15-26 and Case Studies, Box 1. |
| 30.       | Data and findings consistent | Was there consistency between the data presented and the findings?                                                                       | See Manuscript, Results Pages 15-26 .                        |
| 31.       | Clarity of major themes      | Were major themes clearly presented in the findings?                                                                                     | See Manuscript, Results Pages 15-26.                         |

| No  | Item                    | Guide questions/description                                            | Responses and reference in manuscript if appropriate |
|-----|-------------------------|------------------------------------------------------------------------|------------------------------------------------------|
| 32. | Clarity of minor themes | Is there a description of diverse cases or discussion of minor themes? | See Manuscript, Results Pages 15-26.                 |
